# Supplementary material
Source: publisher figshare collection journal article supplement (https://gsajournals.figshare.com/articles/dataset/_/6205691)
Supplement: Supplementary file 1 [file 1]

## Sheet: Complete Data Set
				YHE1609	YHE1608	YHE1609	YHE1609
1: Exon Counts Sequence Reads No Introns				[URE3] -Ade	[ure-o]	[URE3]	[URE3]
2: Exon Counts Unique Insertions No Introns	Systematic	Standard	Gene	-Ade		+Ade 1st	+Ade 2nd
3: Intron Counts Sequence Reads	Name	Name	length	Counts	Counts	Counts	Counts
4: Intron Counts Unique Insertions										start	end
1	YAL001C	TFC3	3573	385	518	200	171	Subunit of RNA polymerase III transcription initiation factor complex; part of the TauB domain of TFIIIC that binds DNA at the BoxB promoter sites of tRNA and similar genes; cooperates with Tfc6p in DNA binding; largest of six subunits of the RNA polymerase III transcription initiation factor complex (TFIIIC)	chrI	147594	151166
2				2	12	13	5
3				0	0	1	0
4				0	0	1	0
1	YAL002W	VPS8	3825	6125	9311	4750	21103	Membrane-binding component of the CORVET complex; involved in endosomal vesicle tethering and fusion in the endosome to vacuole protein targeting pathway; interacts with Vps21p; contains RING finger motif	chrI	143707	147531
2				17	36	36	28
1	YAL003W	EFB1	987	0	51	33	0	Translation elongation factor 1 beta; stimulates nucleotide exchange to regenerate EF-1 alpha-GTP for the next elongation cycle; part of the EF-1 complex, which facilitates binding of aminoacyl-tRNA to the ribosomal A site; human homolog EEF1B2 can complement yeast efb1 mutants	chrI	142174	143160
2				0	2	1	0
3				0	14	0	0
4				0	2	0	0
1	YAL004W		648	62	4414	21640	21428	Dubious open reading frame; unlikely to encode a functional protein, based on available experimental and comparative sequence data; completely overlaps verified gene SSA1/YAL005C	chrI	140760	141407
2				4	83	76	56
1	YAL005C	SSA1	1929	176	8562	46571	59862	ATPase involved in protein folding and NLS-directed nuclear transport; member of HSP70 family; required for ubiquitin-dependent degradation of short-lived proteins; forms chaperone complex with Ydj1p; localized to nucleus, cytoplasm, cell wall; 98% identical to paralog Ssa2p with different functional specificity in propagation of yeast [URE3] prions, vacuolar-mediated degradations of gluconeogene…	chrI	139503	141431
2				11	219	203	162
1	YAL007C	ERP2	648	158	797	588	780	Member of the p24 family involved in ER to Golgi transport; similar to Emp24p and Erv25p; role in misfolded protein quality control; forms a heterotrimeric complex with Erp1p, Emp24p, and Erv25p; localized to COPII-coated vesicles; ERP2 has a paralog, ERP4, that arose from the whole genome duplication	chrI	137698	138345
2				4	12	9	11
1	YAL008W	FUN14	597	5656	1559	1669	395	Integral mitochondrial outer membrane (MOM) protein; dosage suppressor of an MDM10 null that reduces ERMES-related phenotypes, such as alterations in mitochondrial morphology, protein complex assembly, and lipid profile; dosage suppressor of MDM12, MDM34, and MMM1 null mutant growth defects; novel mechanism of MOM import involving Tom70p, the TOM complex, and the TIM23 complex, requiring mitochon…	chrI	136914	137510
2				15	19	22	12
1	YAL009W	SPO7	780	2	19	99	47	Putative regulatory subunit of Nem1p-Spo7p phosphatase holoenzyme; regulates nuclear growth by controlling phospholipid biosynthesis, required for normal nuclear envelope morphology, premeiotic replication, and sporulation	chrI	135854	136633
2				1	4	9	2
1	YAL010C	MDM10	1482	21	141	12	0	Subunit of both the ERMES and the SAM complex; component of ERMES complex which acts as a molecular tether between the mitochondria and the ER, necessary for efficient phospholipid exchange between organelles and for mitophagy; SAM/TOB complex component that functions in the assembly of outer membrane beta-barrel proteins; involved in mitochondrial inheritance and morphology; ERMES complex is oft…	chrI	134184	135665
2				1	5	1	0
1	YAL011W	SWC3	1878	387	1831	869	3646	Protein of unknown function; component of the SWR1 complex, which exchanges histone variant H2AZ (Htz1p) for chromatin-bound histone H2A; required for formation of nuclear-associated array of smooth endoplasmic reticulum known as karmellae	chrI	132199	134076
2				5	44	32	28
1	YAL012W	CYS3	1185	1	70	56	0	Cystathionine gamma-lyase; catalyzes one of the two reactions involved in the transsulfuration pathway that yields cysteine from homocysteine with the intermediary formation of cystathionine; protein abundance increases in response to DNA replication stress	chrI	130799	131983
2				1	2	4	0
1	YAL013W	DEP1	1218	0	384	281	81	Component of the Rpd3L histone deacetylase complex; required for diauxic shift-induced histone H2B deposition onto rDNA genes; transcriptional modulator involved in regulation of structural phospholipid biosynthesis genes and metabolically unrelated genes, as well as maintenance of telomeres, mating efficiency, and sporulation	chrI	129270	130487
2				0	17	10	8
1	YAL014C	SYN8	768	20	358	253	447	Endosomal SNARE related to mammalian syntaxin 8	chrI	128252	129019
2				2	15	15	9
1	YAL015C	NTG1	1200	3150	2509	2677	1961	DNA N-glycosylase and apurinic/apyrimidinic (AP) lyase; involved in base excision repair; acts in both nucleus and mitochondrion; creates a double-strand break at mtDNA origins that stimulates replication in response to oxidative stress; required for maintaining mitochondrial genome integrity; NTG1 has a paralog, NTG2, that arose from the whole genome duplication	chrI	126903	128102
2				13	57	47	11
1	YAL016C-A		315	0	2	0	0	Dubious open reading frame; unlikely to encode a functional protein, based on available experimental and comparative sequence data; partially overlaps ORF TPD3/YAL016W	chrI	124755	125069
2				0	1	0	0
1	YAL016C-B		186	276	91	42	39	Dubious open reading frame; unlikely to encode a functional protein, based on available experimental and comparative sequence data	chrI	124307	124492
2				3	3	3	5
1	YAL016W	TPD3	1908	0	22	21	49	Regulatory subunit A of the heterotrimeric PP2A complex; the heterotrimeric protein phosphatase 2A (PP2A) complex also contains regulatory subunit Cdc55p and either catalytic subunit Pph21p or Pph22p; required for cell morphogenesis and transcription by RNA polymerase III	chrI	124879	126786
2				0	3	4	2
1	YAL017W	PSK1	4071	5005	5095	4460	4395	PAS domain-containing serine/threonine protein kinase; coordinately regulates protein synthesis and carbohydrate metabolism and storage in response to a unknown metabolite that reflects nutritional status; PSK1 has a paralog, PSK2, that arose from the whole genome duplication	chrI	120225	124295
2				23	93	74	51
1	YAL018C	LDS1	978	3031	3612	1725	937	Protein Involved in spore wall assembly; localizes to lipid droplets found on or outside of the prospore membrane; shares similarity with Lds2p and Rrt8p, and a strain mutant for all 3 genes exhibits reduced dityrosine fluorescence relative to the single mutants	chrI	118564	119541
2				11	33	28	15
1	YAL019W	FUN30	3396	536	2360	4455	1191	Snf2p family member with ATP-dependent chromatin remodeling activity; has a role in silencing at the mating type locus, telomeres and centromeres; enriched at centromeres and is required for correct chromatin structure around centromeres, as well as at the boundary element of the silent HMR; recruited to DNA double-strand breaks (DSBs) where it promotes 5' strand resection of DSBs; potential Cdc2…	chrI	114919	118314
2				12	50	50	24
1	YAL019W-A		570	399	1243	547	840	Dubious open reading frame; unlikely to encode a functional protein, based on available experimental and comparative sequence data; partially overlaps ORF ATS1/YAL020C	chrI	114250	114819
2				14	42	28	21
1	YAL020C	ATS1	1002	243	938	307	242	Protein required for modification of wobble nucleosides in tRNA; acts with Elongator complex, Kti11p, and Kti12p; has a potential role in regulatory interactions between microtubules and the cell cycle; forms a stable heterodimer with Kti11p	chrI	113614	114615
2				7	41	12	17
1	YAL021C	CCR4	2514	23	109	43	346	Component of the CCR4-NOT transcriptional complex; CCR4-NOT is involved in regulation of gene expression; component of the major cytoplasmic deadenylase, which is involved in mRNA poly(A) tail shortening	chrI	110846	113359
2				2	3	6	7
1	YAL022C	FUN26	1554	4637	2569	2948	2371	High affinity, broad selectivity, nucleoside/nucleobase transporter; vacuolar membrane localized transporter which may regulate the balance of nicotinamide riboside (NmR) levels between the cytosol and vacuole, contributing to salvage of NmR for use in cytosolic NAD+ synthesis; equilibrative nucleoside transporter (ENT) family member	chrI	108877	110430
2				27	73	75	40
1	YAL023C	PMT2	2280	0	39	418	52	Protein O-mannosyltransferase of the ER membrane; transfers mannose residues from dolichyl phosphate-D-mannose to protein serine/threonine residues; involved in ER quality control; acts in a complex with Pmt1p, can instead interact with Pmt5p; antifungal drug target; PMT2 has a paralog, PMT3, that arose from the whole genome duplication	chrI	106272	108551
2				0	6	6	5
1	YAL024C	LTE1	4308	906	2707	410	332	Protein similar to GDP/GTP exchange factors; without detectable GEF activity; required for asymmetric localization of Bfa1p at daughter-directed spindle pole bodies and for mitotic exit at low temperatures	chrI	101565	105872
2				21	59	21	19
1	YAL025C	MAK16	921	0	0	39	0	Essential nuclear protein; constituent of 66S pre-ribosomal particles; required for maturation of 25S and 5.8S rRNAs; required for maintenance of M1 satellite double-stranded RNA of the L-A virus	chrI	100225	101145
2				0	0	2	0
1	YAL026C	DRS2	4068	378	606	1042	3056	Trans-golgi network aminophospholipid translocase (flippase); maintains membrane lipid asymmetry in post-Golgi secretory vesicles; contributes to clathrin-coated vesicle formation, endocytosis, protein trafficking between the Golgi and endosomal system and the cellular response to mating pheromone; autoinhibited by its C-terminal tail; localizes to the trans-Golgi network; mutations in human homo…	chrI	95630	99697
2				11	32	19	14
1	YAL026C-A		438	20684	4980	4212	1815	Dubious open reading frame; unlikely to encode a functional protein, based on available experimental and comparative sequence data; partially overlaps the uncharacterized ORF YAL027W and the verified gene DRS2	chrI	95386	95823
2				9	22	16	14
1	YAL027W	SAW1	786	23275	5854	4742	2871	5'- and 3'-flap DNA binding protein; recruits Rad1p-Rad10p to single-strand annealing intermediates with 3' non-homologous tails for removal during double-strand break repair; complexes with Rad1p-Rad10p and stimulates its endonuclease activity; green fluorescent protein (GFP)-fusion protein localizes to the nucleus	chrI	94687	95472
2				17	38	29	16
1	YAL028W	FRT2	1587	2732	2690	1441	2795	Tail-anchored ER membrane protein of unknown function; interacts with homolog Frt1p; promotes growth in conditions of high Na+, alkaline pH, or cell wall stress, possibly via a role in posttranslational translocation; potential Cdc28p substrate; FRT2 has a paralog, FRT1, that arose from the whole genome duplication	chrI	92900	94486
2				12	32	28	19
1	YAL029C	MYO4	4416	1766	5003	1928	1586	Type V myosin motor involved in actin-based transport of cargos; required for mRNA transport, including ASH1 mRNA, and facilitating the growth and movement of ER tubules into the growing bud along with She3p; MYO4 has a paralog, MYO2, that arose from the whole genome duplication	chrI	87855	92270
2				22	82	69	34
1	YAL030W	SNC1	467	1181	530	721	774	Vesicle membrane receptor protein (v-SNARE); involved in the fusion between Golgi-derived secretory vesicles with the plasma membrane; proposed to be involved in endocytosis; member of the synaptobrevin/VAMP family of R-type v-SNARE proteins; SNC1 has a paralog, SNC2, that arose from the whole genome duplication	chrI	87286	87752
2				6	17	15	7
3				111	375	353	42
4				1	6	8	2
1	YAL031C	GIP4	2283	10053	4921	3148	2505	Cytoplasmic protein that regulates protein phosphatase 1 Glc7p; protein overexpression relocalizes Glc7p from the nucleus and prevents chromosome segregation; potential Cdc28p substrate	chrI	84749	87031
2				20	65	44	27
1	YAL031W-A		309	445	718	335	487	Dubious open reading frame; unlikely to encode a functional protein, based on available experimental and comparative sequence data; partially overlaps ORF GIP4/YAL031C	chrI	84669	84977
2				2	15	5	9
1	YAL032C	PRP45	1140	1373	2216	2614	1249	Protein required for pre-mRNA splicing; associates with the spliceosome and interacts with splicing factors Prp22p and Prp46p; orthologous to human transcriptional coactivator SKIP and can activate transcription of a reporter gene	chrI	83335	84474
2				3	27	21	12
1	YAL033W	POP5	522	0	0	0	0	Subunit of both RNase MRP and nuclear RNase P; RNase MRP cleaves pre-rRNA, while nuclear RNase P cleaves tRNA precursors to generate mature 5' ends and facilitates turnover of nuclear RNAs	chrI	82706	83227
2				0	0	0	0
1	YAL034C	FUN19	1242	6141	4343	5236	2760	Non-essential protein of unknown function; expression induced in response to heat stress; FUN19 has a paralog, YOR338W, that arose from the whole genome duplication	chrI	80710	81951
2				20	50	50	24
1	YAL034C-B		354	206	130	269	359	Dubious open reading frame; unlikely to encode a functional protein, based on available experimental and comparative sequence data	chrI	79489	79842
2				1	4	6	4
1	YAL034W-A	MTW1	870	510	594	339	119	Essential component of the MIND kinetochore complex; joins kinetochore subunits contacting DNA to those contacting microtubules; critical to kinetochore assembly; complex consists of Mtw1p Including Nnf1p-Nsl1p-Dsn1p (MIND)	chrI	79718	80587
2				5	6	8	4
1	YAL035W	FUN12	3009	294	49	56	0	Translation initiation factor eIF5B; GTPase that promotes Met-tRNAiMet binding to ribosomes and ribosomal subunit joining; promotes GTP-dependent maturation of 18S rRNA by Nob1p; protein abundance increases in response to DNA replication stress; homolog of bacterial IF2	chrI	76427	79435
2				3	2	3	0
1	YAL036C	RBG1	1110	8105	4245	6255	3023	Member of the DRG family of GTP-binding proteins; associates with translating ribosomes; interacts with Tma46p, Ygr250cp, Gir2p and Yap1p via two-hybrid	chrI	75043	76152
2				23	49	58	29
1	YAL037C-A		93	727	310	370	140	Putative protein of unknown function	chrI	73426	73518
2				5	7	4	4
1	YAL037C-B		975	2	0	3	0	Dubious open reading frame; unlikely to encode a functional protein, based on available experimental and comparative sequence data; identified by gene-trapping, microarray-based expression analysis, and genome-wide homology searching	chrI	72326	73300
2				1	0	1	0
1	YAL037W		804	12576	6792	3648	3378	Putative protein of unknown function; YAL037W has a paralog, YOR342C, that arose from the whole genome duplication	chrI	74020	74823
2				25	71	49	36
1	YAL038W	CDC19	1503	2	8	4	0	Pyruvate kinase; functions as a homotetramer in glycolysis to convert phosphoenolpyruvate to pyruvate, the input for aerobic (TCA cycle) or anaerobic (glucose fermentation) respiration; regulated via allosteric activation by fructose bisphosphate; CDC19 has a paralog, PYK2, that arose from the whole genome duplication	chrI	71786	73288
2				1	1	2	0
1	YAL039C	CYC3	810	11035	1365	1380	449	Cytochrome c heme lyase (holocytochrome c synthase); attaches heme to apo-cytochrome c (Cyc1p or Cyc7p) in mitochondrial intermembrane space; human homolog HCCS implicated in microphthalmia with linear skin defects (MLS), and can complement yeast null mutant	chrI	68716	69525
2				87	35	14	27
1	YAL040C	CLN3	1743	3886	1600	502	648	G1 cyclin involved in cell cycle progression; activates Cdc28p kinase to promote G1 to S phase transition; plays a role in regulating transcription of other G1 cyclins, CLN1 and CLN2; regulated by phosphorylation and proteolysis; acetyl-CoA induces CLN3 transcription in response to nutrient repletion to promote cell-cycle entry; cell cycle arrest phenotype of the cln1 cln2 cln3 triple null mutant…	chrI	65778	67520
2				6	14	19	13
1	YAL041W	CDC24	2565	56	81	17	36	Guanine nucleotide exchange factor (GEF) for Cdc42p; required for polarity establishment and maintenance, and mutants have morphological defects in bud formation and shmooing; relocalizes from nucleus to cytoplasm upon DNA replication stress; thermosensitivity of the cdc24-4 mutant in the presence of sorbitol is functionally complemented by human CDC42	chrI	62840	65404
2				2	1	2	3
1	YAL042C-A		378	34	614	543	138	Dubious open reading frame; unlikely to encode a functional protein, based on available experimental and comparative sequence data; partially overlaps verified ORF ERV46/YAL042W; YAL042C-A is a non-essential gene	chrI	61231	61608
2				2	19	21	8
1	YAL042W	ERV46	1248	80	747	893	149	Protein localized to COPII-coated vesicles; forms a complex with Erv41p; involved in the membrane fusion stage of transport	chrI	61316	62563
2				5	26	29	11
1	YAL043C	PTA1	2358	4	31	36	0	Subunit of holo-CPF; holo-CPF is a multiprotein complex and functional homolog of mammalian CPSF, required for the cleavage and polyadenylation of mRNA and snoRNA 3' ends; involved in pre-tRNA processing; binds to the phosphorylated CTD of RNAPII	chrI	58695	61052
2				1	5	3	0
1	YAL044C	GCV3	513	517	142	27	57	H subunit of the mitochondrial glycine decarboxylase complex; glycine decarboxylase is required for the catabolism of glycine to 5,10-methylene-THF; also required for all protein lipoylation; expression is regulated by levels of 5,10-methylene-THF	chrI	57950	58462
2				2	1	5	8
1	YAL044W-A	BOL1	333	2558	3487	1432	1725	Mitochondrial matrix protein involved in Fe-S cluster biogenesis; facilitates [4Fe-2S] cluster inception into mitochondrial proteins such as lipoate synthase and succinate dehydrogenase; interacts and may function with Grx5p at an early step in Fe-S cluster biosynthesis; forms dimeric complexes with Grx5p and Nfu1p that alter the stability of shared Fe/S clusters; sequence similarity to human BOL…	chrI	57518	57850
2				13	33	26	10
1	YAL045C		309	1720	2765	1111	2039	Dubious open reading frame; unlikely to encode a functional protein, based on available experimental and comparative sequence data; almost completely overlaps YAL044W-A	chrI	57488	57796
2				10	26	22	9
1	YAL046C	BOL3	357	0	816	141	534	Protein involved in Fe-S cluster transfer to mitochondrial clients; protects [4Fe-4S] clusters from damage due to oxidative stress by acting along with Nfu1p at a late step in the transfer of [4Fe-4S] clusters from the ISA complex to mitochondrial client proteins like lipoate synthase and succinate dehydrogenase; sequence similarity to human BOLA family member, BOLA3, mutations of which are assoc…	chrI	57029	57385
2				0	8	10	5
1	YAL047C	SPC72	1869	445	296	15	33	Gamma-tubulin small complex (gamma-TuSC) receptor; recruits the gamma-TuSC complex to the cytoplasmic side of the SPB, connecting nuclear microtubules to the SPB; involved in astral microtubule formation, stabilization, and with Stu2p, anchoring astral MTs at the cytoplasmic face of the SPB, and regulating plus-end MT dynamics; regulated by Cdc5 kinase	chrI	54989	56857
2				2	2	4	4
1	YAL047W-A		330	2033	999	1337	1065	Dubious open reading frame; unlikely to encode a functional protein, based on available experimental and comparative sequence data; partially overlaps ORF GEM1/YAL048C	chrI	54584	54913
2				8	25	20	12
1	YAL048C	GEM1	1989	4728	2104	5702	2938	Outer mitochondrial membrane GTPase, subunit of the ERMES complex; potential regulatory subunit of the ERMES complex that links the ER to mitochondria and may promote inter-organellar calcium and phospholipid exchange as well as coordinating mitochondrial DNA replication and growth; cells lacking Gem1p contain collapsed, globular, or grape-like mitochondria; ortholog of metazoan Miro GTPases	chrI	52801	54789
2				30	72	55	43
1	YAL049C	AIM2	741	2103	2924	3428	3055	Cytoplasmic protein involved in mitochondrial function or organization; null mutant displays reduced frequency of mitochondrial genome loss; potential Hsp82p interactor	chrI	51855	52595
2				6	32	27	19
1	YAL051W	OAF1	3144	8605	6014	6233	6245	Oleate-activated transcription factor; subunit of a heterodimeric complex with Pip2p, which binds to oleate-response elements (ORE) in the promoter of genes involved in beta-oxidation of fatty acids, peroxisome organization and biogenesis, activating transcription in the presence of oleate; regulates chromatin silencing at telomeres; involved in diauxic shift; OAF1 has a paralog, PIP2, that arose…	chrI	48564	51707
2				40	96	90	60
1	YAL053W	FLC2	2352	3169	3007	4192	1402	Putative calcium channel involved in calcium release under hypotonic stress; required for uptake of FAD into endoplasmic reticulum; involved in cell wall maintenance; FLC2 has a paralog, YOR365C, that arose from the whole genome duplication	chrI	45899	48250
2				26	42	96	35
1	YAL054C	ACS1	2142	24275	23908	18402	14945	Acetyl-coA synthetase isoform; along with Acs2p, acetyl-coA synthetase isoform is the nuclear source of acetyl-coA for histone acetylation; expressed during growth on nonfermentable carbon sources and under aerobic conditions	chrI	42881	45022
2				47	124	120	71
1	YAL055W	PEX22	543	4203	3637	1422	1031	Putative peroxisomal membrane protein; required for import of peroxisomal proteins; functionally complements a Pichia pastoris pex22 mutation	chrI	42177	42719
2				16	32	25	15
1	YAL056C-A		351	96	258	397	108	Dubious open reading frame; unlikely to encode a functional protein, based on available experimental and comparative sequence data	chrI	38696	39046
2				4	13	10	5
1	YAL056W	GPB2	2643	232	4359	2912	3680	Multistep regulator of cAMP-PKA signaling; inhibits PKA downstream of Gpa2p and Cyr1p, thereby increasing cAMP dependency; inhibits Ras activity through direct interactions with Ira1p/2p; regulated by G-alpha protein Gpa2p; GPB2 has a paralog, GPB1, that arose from the whole genome duplication	chrI	39259	41901
2				14	93	77	59
1	YAL058W	CNE1	1509	2141	2030	2532	2709	Calnexin; integral membrane ER chaperone involved in folding and quality control of glycoproteins; chaperone activity is inhibited by Mpd1p, with which Cne1p interacts; 24% identical to mammalian calnexin; Ca+ binding not yet shown in yeast	chrI	37464	38972
2				22	61	56	30
1	YAL059C-A		423	399	882	443	363	Dubious open reading frame; unlikely to encode a functional protein, based on available experimental and comparative sequence data; partially overlaps verified gene ECM1/YAL059W	chrI	36496	36918
2				2	13	8	8
1	YAL059W	ECM1	639	1738	1004	1921	985	Pre-ribosomal factor involved in 60S ribosomal protein subunit export; associates with the pre-60S particle; shuttles between the nucleus and cytoplasm	chrI	36509	37147
2				6	20	16	15
1	YAL060W	BDH1	1149	22471	12883	22647	12608	NAD-dependent (R,R)-butanediol dehydrogenase; catalyzes oxidation of (R,R)-2,3-butanediol to (3R)-acetoin, oxidation of meso-butanediol to (3S)-acetoin, and reduction of acetoin; enhances use of 2,3-butanediol as an aerobic carbon source	chrI	35155	36303
2				55	87	97	62
1	YAL061W	BDH2	1254	112201	28340	38247	16405	Putative medium-chain alcohol dehydrogenase with similarity to BDH1; transcription induced by constitutively active PDR1 and PDR3	chrI	33448	34701
2				121	163	170	84
1	YAL062W	GDH3	1374	20595	38039	18548	11607	NADP(+)-dependent glutamate dehydrogenase; synthesizes glutamate from ammonia and alpha-ketoglutarate; rate of alpha-ketoglutarate utilization differs from Gdh1p; expression regulated by nitrogen and carbon sources; GDH3 has a paralog, GDH1, that arose from the whole genome duplication	chrI	31567	32940
2				65	242	153	84
1	YAL063C	FLO9	3969	43923	26347	25241	18270	Lectin-like protein with similarity to Flo1p; thought to be expressed and involved in flocculation	chrI	24000	27968
2				110	243	226	132
1	YAL063C-A		291	272	592	126	111	Putative protein of unknown function; identified by expression profiling and mass spectrometry	chrI	22395	22685
2				5	11	7	9
1	YAL064C-A	TDA8	381	904	1482	1240	681	Putative protein of unknown function; null mutant is sensitive to expression of the top1-T722A allele; not an essential gene	chrI	13363	13743
2				5	14	9	8
1	YAL064W		285	3574	1985	3104	73	Protein of unknown function; may interact with ribosomes, based on co-purification experiments	chrI	21566	21850
2				11	16	13	5
1	YAL064W-B		381	690	1836	1934	4414	Fungal-specific protein of unknown function	chrI	12046	12426
2				10	32	32	12
1	YAL065C		387	4962	2731	4380	2647	Putative protein of unknown function; shows sequence similarity to FLO1 and other flocculins	chrI	11565	11951
2				10	33	38	22
1	YAL066W		309	724	947	771	86	Dubious open reading frame; unlikely to encode a functional protein, based on available experimental and comparative sequence data	chrI	10091	10399
2				4	19	18	4
1	YAL067C	SEO1	1782	3698	8242	6217	4618	Putative permease; member of the allantoate transporter subfamily of the major facilitator superfamily; mutation confers resistance to ethionine sulfoxide	chrI	7235	9016
2				19	71	68	39
1	YAL067W-A		228	46081	41787	40874	29916	Putative protein of unknown function; identified by gene-trapping, microarray-based expression analysis, and genome-wide homology searching	chrI	2480	2707
2				29	40	35	27
1	YAL068C	PAU8	363	5867	7926	6390	7092	Protein of unknown function; member of the seripauperin multigene family encoded mainly in subtelomeric regions	chrI	1807	2169
2				14	26	21	22
1	YAL068W-A		255	4236	13303	7869	6729	Dubious open reading frame; unlikely to encode a functional protein, based on available experimental and comparative sequence data; identified by gene-trapping, microarray-based expression analysis, and genome-wide homology searching	chrI	538	792
2				14	35	26	18
1	YAL069W		315	11149	24376	16732	17912	Dubious open reading frame; unlikely to encode a functional protein, based on available experimental and comparative sequence data	chrI	335	649
2				25	56	50	47
1	YAR002C-A	ERP1	660	549	1584	4732	2371	Member of the p24 family involved in ER to Golgi transport; role in misfolded protein quality control; forms heterotrimeric complex with Erp2p, Emp24p, and Erv25p; localized to COPII-coated vesicles; ERP1 has a paralog, ERP6, that arose from the whole genome duplication	chrI	154065	154724
2				11	33	26	24
1	YAR002W	NUP60	1620	322	1367	2303	3585	FG-nucleoporin component of central core of the nuclear pore complex; contributes directly to nucleocytoplasmic transport and maintenance of the nuclear pore complex (NPC) permeability barrier and is involved in gene tethering at the nuclear periphery; relocalizes to the cytosol in response to hypoxia; both NUP1 and NUP60 are homologous to human NUP153	chrI	152257	153876
2				12	67	70	52
1	YAR003W	SWD1	1281	35	41	309	235	Subunit of the COMPASS (Set1C) complex; COMPASS methylates histone H3 on lysine 4 and is required in transcriptional silencing near telomeres; WD40 beta propeller superfamily member with similarity to mammalian Rbbp7	chrI	155005	156285
2				2	12	28	27
1	YAR007C	RFA1	1866	0	149	143	71	Subunit of heterotrimeric Replication Protein A (RPA); RPA is a highly conserved single-stranded DNA binding protein involved in DNA replication, repair, and recombination; RPA protects against inappropriate telomere recombination, and upon telomere uncapping, prevents cell proliferation by a checkpoint-independent pathway; role in DNA catenation/decatenation pathway of chromosome disentangling; …	chrI	156754	158619
2				0	2	6	3
1	YAR008W	SEN34	828	0	15	3	0	Subunit of the tRNA splicing endonuclease; tRNA splicing endonuclease (Sen complex) is composed of Sen2p, Sen15p, Sen34p, and Sen54p; Sen complex also cleaves the CBP1 mRNA at the mitochondrial surface; Sen34p contains the active site for tRNA 3' splice site cleavage and has similarity to Sen2p and to Archaeal tRNA splicing endonuclease	chrI	158966	159793
2				0	1	2	0
1	YAR014C	BUD14	2130	41768	28162	30894	19717	Protein involved in bud-site selection; Bud14p-Glc7p complex is a cortical regulator of dynein; forms a complex with Kel1p and Kel2p that regulates Bnr1p (formin) to affect actin cable assembly, cytokinesis, and polarized growth; diploid mutants display a random budding pattern instead of the wild-type bipolar pattern; relative distribution to the nucleus increases upon DNA replication stress	chrI	166742	168871
2				173	295	287	182
1	YAR015W	ADE1	921	45028	60987	73531	22160	N-succinyl-5-aminoimidazole-4-carboxamide ribotide synthetase; required for 'de novo' purine nucleotide biosynthesis; red pigment accumulates in mutant cells deprived of adenine; protein abundance increases in response to DNA replication stress	chrI	169375	170295
2				73	128	113	70
1	YAR018C	KIN3	1308	2934	2932	7824	2299	Nonessential serine/threonine protein kinase; possible role in DNA damage response; influences tolerance to high levels of ethanol	chrI	170396	171703
2				17	47	40	21
1	YAR019C	CDC15	2925	2	2012	1483	463	Protein kinase of the Mitotic Exit Network; localized to the spindle pole bodies at late anaphase; promotes mitotic exit by directly switching on the kinase activity of Dbf2p; required for spindle disassembly after meiosis II; relocalizes to the cytoplasm upon DNA replication stress	chrI	172211	175135
2				2	25	27	12
1	YAR019W-A		333	5677	1775	4008	3629	Dubious open reading frame; unlikely to encode a functional protein, based on available experimental and comparative sequence data; partially overlaps ORF CDC15/YAR019C	chrI	174998	175330
2				19	53	47	24
1	YAR020C	PAU7	168	366	112	270	253	Member of the seripauperin multigene family; active during alcoholic fermentation, regulated by anaerobiosis, inhibited by oxygen, repressed by heme	chrI	176856	177023
2				3	8	16	3
1	YAR023C		540	72	388	302	232	Putative integral membrane protein; member of DUP240 gene family	chrI	179281	179820
2				1	8	5	3
1	YAR027W	UIP3	708	1365	134	896	165	Putative integral membrane protein of unknown function; interacts with Ulp1p at the nuclear periphery; member of DUP240 gene family	chrI	183770	184477
2				1	7	2	1
1	YAR028W		705	1217	2274	2603	1903	Putative integral membrane protein; member of DUP240 gene family; GFP-fusion protein is induced in response to the DNA-damaging agent MMS	chrI	184892	185596
2				5	28	18	13
1	YAR029W		225	1058	1317	1104	375	Member of DUP240 gene family but contains no transmembrane domains; green fluorescent protein (GFP)-fusion protein localizes to the cytoplasm in a punctate pattern	chrI	186321	186545
2				12	31	23	8
1	YAR030C		342	3353	3164	3669	855	Dubious open reading frame; unlikely to encode a functional protein, based on available experimental and comparative sequence data; partially overlaps the uncharacterized ORF YAR029W and the verified gene PRM9	chrI	186512	186853
2				11	39	26	14
1	YAR031W	PRM9	897	1459	645	210	0	Pheromone-regulated protein; contains 3 predicted transmembrane segments and an FF sequence, a motif involved in COPII binding; member of DUP240 gene family; PRM9 has a paralog, PRM8, that arose from a segmental duplication	chrI	186836	187732
2				2	7	5	0
1	YAR033W	MST28	705	2273	498	519	248	Putative integral membrane protein, involved in vesicle formation; forms complex with Mst27p; member of DUP240 gene family; binds COPI and COPII vesicles; MST28 has a paralog, MST27, that arose from a segmental duplication	chrI	188107	188811
2				7	7	10	5
1	YAR035C-A		81	6728	1242	1612	1075	Putative protein of unknown function; identified by gene-trapping, microarray-based expression analysis, and genome-wide homology searching; predicted to have a role in cell budding based on computational "guilt by association" analysis	chrI	192337	192417
2				14	29	27	12
1	YAR035W	YAT1	2064	1332	2855	2096	1377	Outer mitochondrial carnitine acetyltransferase; minor ethanol-inducible enzyme involved in transport of activated acyl groups from the cytoplasm into the mitochondrial matrix; phosphorylated	chrI	190193	192256
2				11	30	28	14
1	YAR042W	SWH1	3567	944	274	172	346	Protein similar to mammalian oxysterol-binding protein; contains ankyrin repeats and FFAT motif; interacts with ER anchor Scs2p at the nucleus-vacuole junction; regulated by sterol binding; SWH1 has a paralog, OSH2, that arose from the whole genome duplication	chrI	192619	196185
2				2	7	6	5
1	YAR043C		321	65769	99669	61569	54180	Deleted ORF; does not encode a protein; included in the original annotation of Chromosome I but later withdrawn	chrI	192928	193248
2				154	420	297	244
1	YAR044W		2580	4137	4501	4560	2538	Merged open reading frame; does not encode a discrete protein; YAR044W was originally annotated as an independent ORF, but as a result of a sequence change, it was merged with an adjacent ORF into a single reading frame, designated YAR042W	chrI	193600	196179
2				23	96	92	38
1	YAR047C		321	818	826	33	64	Dubious open reading frame; unlikely to encode a functional protein, based on available experimental and comparative sequence data	chrI	201467	201787
2				2	8	4	5
1	YAR050W	FLO1	4614	32244	23258	18841	18384	Lectin-like protein involved in flocculation; cell wall protein that binds mannose chains on the surface of other cells, confers floc-forming ability that is chymotrypsin sensitive and heat resistant; important for co-flocculation with other yeasts, mediating interaction with specific species; FLO1 has a paralog, FLO5, that arose from a segmental duplication	chrI	203403	208016
2				105	239	225	133
1	YAR052C		381	5177	5161	1520	2031	Deleted ORF; does not encode a protein; included in the original annotation of Chromosome I but later withdrawn	chrI	207122	207502
2				4	16	11	13
1	YAR053W		297	7744	7729	4594	1884	Dubious open reading frame; unlikely to encode a functional protein, based on available experimental and comparative sequence data	chrI	208367	208663
2				15	45	32	19
1	YAR060C		336	3679	7185	7596	6847	Dubious open reading frame; unlikely to encode a functional protein, based on available experimental and comparative sequence data; YAR060C has a paralog, YHR212C, that arose from a segmental duplication	chrI	217157	217492
2				22	52	44	34
1	YAR064W		300	4332	2917	3267	1905	Pseudogenic fragment with similarity to flocculins; YAR064W has a paralog, YHR213W-B, that arose from a segmental duplication	chrI	220198	220497
2				9	38	41	30
1	YAR066W		612	3845	6157	4410	1627	Putative GPI protein; SWAT-GFP and mCherry fusion proteins localize to the endoplasmic reticulum and vacuole respectively; YAR066W has a paralog, YHR214W, that arose from a segmental duplication	chrI	221049	221660
2				17	52	48	29
1	YAR068W		486	3402	3575	3048	1173	Fungal-specific protein of unknown function; induced in respiratory-deficient cells; YAR068W has a paralog, YHR214W-A, that arose from a segmental duplication	chrI	222406	222891
2				9	21	16	12
1	YAR069C		294	5059	6709	6542	2791	Dubious open reading frame; unlikely to encode a protein, based on available experimental and comparative sequence data; YAR069C has a paralog, YHR214C-D, that arose from a segmental duplication	chrI	224011	224304
2				12	32	30	15
1	YAR070C		300	23806	15807	13314	9270	Dubious open reading frame; unlikely to encode a protein, based on available experimental and comparative sequence data; YAR070C has a paralog, YHR214C-B, that arose from a segmental duplication	chrI	224563	224862
2				48	109	114	73
1	YAR071W	PHO11	1404	4775	7667	6353	5139	One of three repressible acid phosphatases; glycoprotein that is transported to the cell surface by the secretory pathway; induced by phosphate starvation and coordinately regulated by PHO4 and PHO2; PHO11 has a paralog, PHO12, that arose from a segmental duplication	chrI	225460	226863
2				31	65	59	43
1	YAR073W	IMD1	1212	3585	4020	3036	2446	Nonfunctional protein with homology to IMP dehydrogenase; blocked reading frame, located close to the telomere; not expressed at detectable levels; YAR073W and YAR075W comprise a continuous reading frame in most strains of S. cerevisiae; YAR073W/YAR075W together have a paralog, IMD2, that arose from a segmental duplication	chrI	227742	228953
2				11	25	24	15
1	YAR074C		327	25057	14345	9626	11268	Deleted ORF; does not encode a protein; included in the original annotation of Chromosome I but later withdrawn	chrI	228529	228855
2				34	50	47	42
1	YAR075W		474	4926	3807	4200	2670	Non-functional protein with homology IMP dehydrogenase; YAR073W/IMD1 and YAR075W comprise a continuous reading frame in most strains of S. cerevisiae; YAR073W/YAR075W together have a paralog, IMD2, that arose from a segmental duplication	chrI	228844	229317
2				25	55	49	24
1	YBL001C	ECM15	315	4084	4657	6413	15844	Non-essential protein of unknown function; likely exists as tetramer, may be regulated by the binding of small-molecule ligands (possibly sulfate ions), may have a role in yeast cell-wall biogenesis	chrII	237153	237467
2				17	44	33	32
1	YBL002W	HTB2	396	11	12	18	1	Histone H2B; core histone protein required for chromatin assembly and chromosome function; nearly identical to HTB1; Rad6p-Bre1p-Lge1p mediated ubiquitination regulates reassembly after DNA replication, transcriptional activation, meiotic DSB formation and H3 methylation	chrII	236492	236887
2				2	6	11	1
1	YBL003C	HTA2	399	4574	7436	4600	2884	Histone H2A; core histone protein required for chromatin assembly and chromosome function; one of two nearly identical (see also HTA1) subtypes; DNA damage-dependent phosphorylation by Mec1p facilitates DNA repair; acetylated by Nat4p	chrII	235394	235792
2				31	86	61	38
1	YBL004W	UTP20	7482	93273	20817	60526	23558	Component of the small-subunit (SSU) processome; SSU processome is involved in the biogenesis of the 18S rRNA	chrII	227636	235117
2				131	133	200	92
1	YBL005W	PDR3	2931	123797	38664	83062	33655	Transcriptional activator of the pleiotropic drug resistance network; regulates expression of ATP-binding cassette (ABC) transporters through binding to cis-acting PDRE sites (PDR responsive elements); has a role in response to drugs and organic solvents; post-translationally up-regulated in cells lacking functional mitochondrial genome; involved in diauxic shift; relative distribution to nucleus…	chrII	217470	220400
2				257	338	440	212
1	YBL006C	LDB7	543	696	908	1649	869	Component of the RSC chromatin remodeling complex; interacts with Rsc3p, Rsc30p, Npl6p, and Htl1p to form a module important for a broad range of RSC functions	chrII	216587	217129
2				6	27	31	12
1	YBL006W-A		150	457	661	1147	687	Dubious open reading frame; unlikely to encode a functional protein, based on available experimental and comparative sequence data; completely overlaps the verified gene LDB7/YBL006C	chrII	216711	216860
2				4	15	9	7
1	YBL007C	SLA1	3735	46	804	737	124	Cytoskeletal protein binding protein; required for assembly of the cortical actin cytoskeleton; interacts with proteins regulating actin dynamics and proteins required for endocytosis; found in the nucleus and cell cortex; has 3 SH3 domains	chrII	212632	216366
2				2	20	20	7
1	YBL008W	HIR1	2523	20	393	608	4332	Subunit of the HIR complex; HIR is a nucleosome assembly complex involved in regulation of histone gene transcription; contributes to nucleosome formation, heterochromatic gene silencing, and formation of functional kinetochores	chrII	209653	212175
2				1	38	36	18
1	YBL008W-A		240	44	360	318	19	Putative protein of unknown function; identified by fungal homology and RT-PCR	chrII	209409	209648
2				1	20	12	2
1	YBL009W	ALK2	2031	4896	4303	2438	935	Protein kinase; along with its paralog, ALK1, required for proper spindle positioning and nuclear segregation following mitotic arrest, proper organization of cell polarity factors in mitosis, proper localization of formins and polarity factors, and survival in cells that activate spindle assembly checkpoint; phosphorylated in response to DNA damage; ALK2 has a paralog, ALK1, that arose from the …	chrII	207194	209224
2				13	53	49	23
1	YBL010C		843	426	204	192	69	Putative protein of unknown function; green fluorescent protein (GFP)-fusion protein colocalizes with clathrin-coated vesicles	chrII	206107	206949
2				4	15	11	8
1	YBL011W	SCT1	2280	5905	3790	5431	6337	Glycerol 3-phosphate/dihydroxyacetone phosphate sn-1 acyltransferase; dual substrate-specific acyltransferase of the glycerolipid biosynthesis pathway; prefers 16-carbon fatty acids; similar to Gpt2p; gene is constitutively transcribed	chrII	203538	205817
2				22	69	66	41
1	YBL012C		402	8854	1677	1906	1857	Dubious open reading frame; unlikely to encode a functional protein, based on available experimental and comparative sequence data	chrII	203406	203807
2				15	32	28	23
1	YBL013W	FMT1	1206	6327	4101	28	489	Methionyl-tRNA formyltransferase; catalyzes the formylation of initiator Met-tRNA in mitochondria; potential Cdc28p substrate	chrII	202056	203261
2				52	84	9	37
1	YBL014C	RRN6	2685	2263	641	625	575	Component of the core factor (CF) rDNA transcription factor complex; CF is required for transcription of 35S rRNA genes by RNA polymerase I and is composed of Rrn6p, Rrn7p, and Rrn11p	chrII	199064	201748
2				3	9	11	3
1	YBL015W	ACH1	1581	9644	19180	23336	7804	Protein with CoA transferase activity; particularly for CoASH transfer from succinyl-CoA to acetate; has minor acetyl-CoA-hydrolase activity; phosphorylated; required for acetate utilization and for diploid pseudohyphal growth	chrII	194122	195702
2				34	86	82	52
1	YBL016W	FUS3	1062	6858	12908	7131	3488	Mitogen-activated serine/threonine protein kinase involved in mating; phosphoactivated by Ste7p; substrates include Ste12p, Far1p, Bni1p, Sst2p; inhibits invasive growth during mating by phosphorylating Tec1p, promoting its; inhibits recruitment of Ste5p, Cdc42p-mediated asymmetry and mating morphogenesis	chrII	192451	193512
2				24	95	62	41
1	YBL017C	PEP1	4740	361	3368	1009	1680	Type I transmembrane sorting receptor for multiple vacuolar hydrolases; cycles between the late-Golgi and prevacuolar endosome-like compartments	chrII	186844	191583
2				7	102	67	39
1	YBL018C	POP8	477	2	19	17	4	Subunit of both RNase MRP and nuclear RNase P; RNase MRP cleaves pre-rRNA, while nuclear RNase P cleaves tRNA precursors to generate mature 5' ends and facilitates turnover of nuclear RNAs; relocalizes to the cytosol in response to hypoxia	chrII	185998	186474
2				1	2	2	1
3				0	6	0	3
4				0	1	0	1
1	YBL019W	APN2	1563	500	4027	3118	965	Class II abasic (AP) endonuclease involved in repair of DNA damage; homolog of human HAP1 and E. coli exoIII	chrII	184353	185915
2				11	67	47	19
1	YBL020W	RFT1	1725	44	576	45	51	Membrane protein required for translocation of Man5GlcNac2-PP-Dol; required for translocation of Man5GlcNac2-PP-Dol from the cytoplasmic side to the lumenal side of the ER membrane but is not the flippase; mutation is suppressed by expression of human p53 protein; essential gene	chrII	182401	184125
2				2	4	4	4
1	YBL021C	HAP3	435	436	852	12	8	Subunit of the Hap2p/3p/4p/5p CCAAT-binding complex; complex is heme-activated and glucose-repressed; complex is a transcriptional activator and global regulator of respiratory gene expression; contains sequences contributing to both complex assembly and DNA binding	chrII	181660	182094
2				8	22	1	3
1	YBL022C	PIM1	3402	808	394	376	47	ATP-dependent Lon protease; involved in degradation of misfolded proteins in mitochondria; required for biogenesis and maintenance of mitochondria	chrII	177874	181275
2				13	14	7	6
1	YBL023C	MCM2	2607	121	57	25	14	Protein involved in DNA replication; component of the Mcm2-7 hexameric helicase complex that binds chromatin as a part of the pre-replicative complex; relative distribution to the nucleus increases upon DNA replication stress	chrII	174920	177526
2				1	5	4	2
1	YBL024W	NCL1	2055	4471	7428	2126	4755	S-adenosyl-L-methionine-dependent tRNA: m5C-methyltransferase; methylates cytosine to m5C at several positions in tRNAs and intron-containing pre-tRNAs; increases proportion of tRNALeu(CAA) with m5C at wobble position in response to hydrogen peroxide, causing selective translation of mRNA from genes enriched in TTG codon; loss of NCL1 confers hypersensitivity to oxidative stress; similar to Nop2p…	chrII	172534	174588
2				18	61	50	39
1	YBL025W	RRN10	438	0	18	161	465	Protein involved in promoting high level transcription of rDNA; subunit of UAF (upstream activation factor) for RNA polymerase I	chrII	171481	171918
2				0	3	4	3
1	YBL026W	LSM2	416	5	69	13	0	Lsm (Like Sm) protein; part of heteroheptameric complexes (Lsm2p-7p and either Lsm1p or 8p): cytoplasmic Lsm1p complex involved in mRNA decay; nuclear Lsm8p complex part of U6 snRNP and possibly involved in processing tRNA, snoRNA, and rRNA; relocalizes from nucleus to cytoplasmic foci upon DNA replication stress	chrII	170623	171038
2				1	2	3	0
3				0	0	0	0
4				0	0	0	0
1	YBL027W	RPL19B	954	2479	1119	1271	3138	Ribosomal 60S subunit protein L19B; rpl19a and rpl19b single null mutations result in slow growth, while the double null mutation is lethal; homologous to mammalian ribosomal protein L19, no bacterial homolog; RPL19B has a paralog, RPL19A, that arose from the whole genome duplication	chrII	168423	169376
2				13	21	35	27
3				1605	808	765	1478
4				15	16	23	12
1	YBL028C		321	3808	3361	3269	1946	Protein of unknown function that may interact with ribosomes; green fluorescent protein (GFP)-fusion protein localizes to the nucleolus; predicted to be involved in ribosome biogenesis	chrII	167518	167838
2				6	21	11	8
1	YBL029C-A		285	7376	9386	12406	4318	Protein of unknown function; green fluorescent protein (GFP)-fusion protein localizes to the cell periphery; protein abundance increases in response to DNA replication stress; has potential orthologs in Saccharomyces species and in Yarrowia lipolytica	chrII	164488	164772
2				20	51	40	27
1	YBL029W		1131	56054	21023	15805	9287	Non-essential protein of unknown function	chrII	166134	167264
2				54	125	73	65
1	YBL030C	PET9	957	0	40	33	0	Major ADP/ATP carrier of the mitochondrial inner membrane; exchanges cytosolic ADP for mitochondrially synthesized ATP; also imports heme and ATP; required for viability in many lab strains that carry a sal1 mutation; PET9 has a paralog, AAC3, that arose from the whole genome duplication; human homolog SLC25A4 implicated in progressive external ophthalmoplegia can complement yeast null mutant	chrII	163041	163997
2				0	1	1	0
1	YBL031W	SHE1	1017	2224	2696	2956	1471	Mitotic spindle protein; interacts with components of the Dam1 (DASH) complex, its effector Sli15p, and microtubule-associated protein Bim1p; also localizes to nuclear microtubules and to the bud neck in a ring-shaped structure; inhibits dynein function	chrII	161699	162715
2				15	50	41	23
1	YBL032W	HEK2	1146	183	2170	2937	1757	RNA binding protein involved in asymmetric localization of ASH1 mRNA; represses translation of ASH1 mRNA, an effect reversed by Yck1p-dependent phosphoryation; regulates telomere position effect and length; similarity to hnRNP-K	chrII	160184	161329
2				7	38	33	21
1	YBL033C	RIB1	1038	1052	1503	1752	141	GTP cyclohydrolase II; catalyzes the first step of the riboflavin biosynthesis pathway	chrII	158656	159693
2				6	10	9	6
1	YBL034C	STU1	4542	60	22	16	35	Component of the mitotic spindle; binds to interpolar microtubules via its association with beta-tubulin (Tub2p); required for interpolar microtubules to provide an outward force on the spindle poles	chrII	153848	158389
2				4	1	4	4
1	YBL035C	POL12	2118	225	479	342	469	B subunit of DNA polymerase alpha-primase complex; required for initiation of DNA replication during mitotic and premeiotic DNA synthesis; also functions in telomere capping and length regulation	chrII	151493	153610
2				2	5	2	3
1	YBL036C		774	1967	540	395	308	Putative non-specific single-domain racemase; based on structural similarity; binds pyridoxal 5'-phosphate; expression of GFP-fusion protein induced in response to the DNA-damaging agent MMS	chrII	150447	151220
2				11	20	14	7
1	YBL037W	APL3	3078	1297	2825	2990	1907	Alpha-adaptin; large subunit of the clathrin associated protein complex (AP-2); involved in vesicle mediated transport	chrII	147209	150286
2				17	85	68	49
1	YBL038W	MRPL16	699	1104	13	26	28	Mitochondrial ribosomal protein of the large subunit; homologous to bacterial L16 ribosomal protein; synthetic lethality with hac1 mutation suggests a possible role in synthesis of precursors for protein glycosylation	chrII	146187	146885
2				14	6	4	6
1	YBL039C	URA7	1740	4997	5383	2899	4002	Major CTP synthase isozyme (see also URA8); catalyzes the ATP-dependent transfer of the amide nitrogen from glutamine to UTP, forming CTP, the final step in de novo biosynthesis of pyrimidines; involved in phospholipid biosynthesis; capable of forming cytoplasmic filaments termed cytoophidium, especially during conditions of glucose depletion; URA7 has a paralog, URA8, that arose from the whole g…	chrII	143989	145728
2				19	68	57	39
1	YBL039C-A		84	0	14	9	0	Dubious open reading frame; unlikely to encode a functional protein, based on available experimental and comparative sequence data; completely overlaps the verified ORF URA7; identified by expression profiling and mass spectrometry	chrII	144948	145031
2				0	1	2	0
1	YBL039W-B		180	417	280	337	27	Putative protein of unknown function; mCherry fusion protein localizes to the vacuole	chrII	143393	143572
2				1	6	6	4
1	YBL040C	ERD2	757	2810	1137	1634	1479	HDEL receptor; an integral membrane protein that binds to the HDEL motif in proteins destined for retention in the endoplasmic reticulum; has a role in maintenance of normal levels of ER-resident proteins	chrII	142112	142868
2				2	3	5	5
3				0	0	0	0
4				0	0	0	0
1	YBL041W	PRE7	726	13	33	70	0	Beta 6 subunit of the 20S proteasome	chrII	141247	141972
2				1	1	3	0
1	YBL042C	FUI1	1920	14593	16641	10458	11229	High affinity uridine permease, localizes to the plasma membrane; also mediates low but significant transport of the cytotoxic nucleoside analog 5-fluorouridine; not involved in uracil transport; relative distribution to the vacuole increases upon DNA replication stress	chrII	138341	140260
2				46	157	114	85
1	YBL043W	ECM13	774	1969	9289	7970	3100	Non-essential protein of unknown function; induced by treatment with 8-methoxypsoralen and UVA irradiation; ECM13 has a paralog, YJR115W, that arose from the whole genome duplication	chrII	136688	137461
2				25	86	76	40
1	YBL044W		369	16684	34562	24772	13330	Putative protein of unknown function; YBL044W is not an essential protein	chrII	135998	136366
2				42	75	73	51
1	YBL045C	COR1	1374	4538	65	24	84	Core subunit of the ubiquinol-cytochrome c reductase complex; the ubiquinol-cytochrome c reductase complex (bc1 complex) is a component of the mitochondrial inner membrane electron transport chain	chrII	134143	135516
2				28	3	6	11
1	YBL046W	PSY4	1326	1012	2137	1455	1156	Regulatory subunit of protein phosphatase PP4; presence of Psy4p in the PP4 complex (along with catalytic subunit Pph3p and Psy2p) is required for dephosphorylation of the histone variant H2AX, but not for dephosphorylation of Rad53p, during recovery from the DNA damage checkpoint; localization is cell-cycle dependent and regulated by Cdc28p phosphorylation; required for cisplatin resistance; hom…	chrII	132424	133749
2				14	46	44	21
1	YBL047C	EDE1	4146	57	2784	2201	1230	Scaffold protein involved in the formation of early endocytic sites; putative regulator of cytokinesis; homo-oligomerization is required for localization to and organization of endocytic sites; has a network of interactions with other endocytic proteins; binds membranes in a ubiquitin-dependent manner; may also bind ubiquitinated membrane-associated proteins; interacts with Cmk2 and functions ups…	chrII	127895	132040
2				7	102	78	36
1	YBL048W	RRT1	312	385	645	326	867	Putative protein of unknown function; conserved across S. cerevisiae strains; identified in a screen for mutants with increased levels of rDNA transcription	chrII	127299	127610
2				7	13	8	5
1	YBL049W	MOH1	417	88	830	626	246	Protein of unknown function, essential for stationary phase survival; not required for growth on nonfermentable carbon sources; possibly linked with vacuolar transport	chrII	126828	127244
2				7	17	15	7
1	YBL050W	SEC17	995	442	154	91	183	Alpha-SNAP cochaperone; SNARE-complex adaptor for Sec18 (NSF) during the disassembly of postfusion cis-SNARE complexes; stimulates the ATPase activity of Sec18p; peripheral membrane protein required for vesicular transport between ER and Golgi, the 'priming' step in homotypic vacuole fusion, and autophagy; similar to mammalian alpha-SNAP	chrII	125125	126119
2				1	3	3	2
3				0	0	0	0
4				0	0	0	0
1	YBL051C	PIN4	2007	343	2768	31	94	Protein involved in G2/M phase progression and response to DNA damage; interacts with Rad53p; contains an RNA recognition motif, a nuclear localization signal, and several SQ/TQ cluster domains; hyperphosphorylated in response to DNA damage	chrII	122753	124759
2				12	37	6	7
1	YBL052C	SAS3	2496	15314	8868	12161	6521	Histone acetyltransferase catalytic subunit of NuA3 complex; acetylates histone H3, involved in transcriptional silencing; homolog of the mammalian MOZ proto-oncogene; mutant has aneuploidy tolerance; sas3gcn5 double mutation is lethal	chrII	119379	121874
2				32	73	68	48
1	YBL053W		375	1695	1051	740	527	Dubious open reading frame; unlikely to encode a functional protein, based on available experimental and comparative sequence data	chrII	119335	119709
2				11	21	17	11
1	YBL054W	TOD6	1578	2593	7213	7738	6617	PAC motif binding protein involved in rRNA and ribosome biogenesis; subunit of the RPD3L histone deacetylase complex; Myb-like HTH transcription factor; hypophosphorylated by rapamycin treatment in a Sch9p-dependent manner; activated in stochastic pulses of nuclear localization	chrII	117589	119166
2				17	62	46	32
1	YBL055C		1257	4440	2745	9415	1144	3'-->5' exonuclease and endonuclease with a possible role in apoptosis; has similarity to mammalian and C. elegans apoptotic nucleases	chrII	115573	116829
2				16	36	36	16
1	YBL056W	PTC3	1407	629	963	2404	1300	Type 2C protein phosphatase (PP2C); dephosphorylates Hog1p (see also Ptc2p) to limit maximal kinase activity induced by osmotic stress; dephosphorylates T169 phosphorylated Cdc28p (see also Ptc2p); role in DNA damage checkpoint inactivation; PTC3 has a paralog, PTC2, that arose from the whole genome duplication	chrII	113762	115168
2				13	39	37	14
1	YBL057C	PTH2	627	5351	1083	4176	971	One of two mitochondrially-localized peptidyl-tRNA hydrolases; negatively regulates the ubiquitin-proteasome pathway via interactions with ubiquitin-like ubiquitin-associated proteins; dispensable for cell growth; see also PTH1	chrII	112801	113427
2				13	24	24	12
1	YBL058W	SHP1	1272	2803	594	429	2576	UBX domain-containing substrate adaptor for Cdc48p; ubiquitin regulatory X domain-containing protein that acts as a substrate recruiting cofactor for Cdc48p; positively regulates Glc7p PPase activity to promote growth and mitotic progression in complex with Cdc48p; ubiquitinated protein interactor involved in ER-associated degradation (ERAD); regulated by nuclear Ub-dependent degradation (INMAD p…	chrII	111437	112708
2				16	35	33	33
1	YBL059C-A	CMC2	415	2427	1	213	37	Protein involved in respiratory chain complex assembly or maintenance; protein of the mitochondrial intermembrane space; contains twin Cx9C motifs that can form coiled coil-helix-coiled-coil helix fold	chrII	110125	110539
2				7	1	3	2
3				0	1	0	4
4				0	1	0	1
1	YBL059W		651	3688	2187	1250	475	Putative protein of unknown function; the authentic, non-tagged protein is detected in highly purified mitochondria in high-throughput studies; YBL059W has a paralog, YER093C-A, that arose from the whole genome duplication	chrII	110594	111244
2				8	27	23	16
3				2634	209	9	24
4				2	5	2	1
1	YBL060W	YEL1	2064	3869	2325	2260	4175	Guanine nucleotide exchange factor specific for Arf3p; localized to the bud neck and tip; required for localization of Arf3p to the bud neck and tip	chrII	107932	109995
2				21	54	53	35
1	YBL061C	SKT5	2091	742	3787	2431	4679	Activator of Chs3p (chitin synthase III) during vegetative growth; recruits Chs3p to the bud neck via interaction with Bni4p; SKT5 has a paralog, SHC1, that arose from the whole genome duplication	chrII	105316	107406
2				5	62	49	61
1	YBL062W		381	541	832	1580	2006	Dubious open reading frame; unlikely to encode a functional protein, based on available experimental and comparative sequence data	chrII	105308	105688
2				4	16	11	11
1	YBL063W	KIP1	3336	6305	11887	7007	9955	Kinesin-related motor protein; required for mitotic spindle assembly, chromosome segregation, and 2 micron plasmid partitioning; functionally redundant with Cin8p for chromosomal but not plasmid functions	chrII	101886	105221
2				24	91	66	49
1	YBL064C	PRX1	786	4660	3214	3358	2044	Mitochondrial peroxiredoxin with thioredoxin peroxidase activity; has a role in reduction of hydroperoxides; reactivation requires Trr2p and glutathione; induced during respiratory growth and oxidative stress; phosphorylated; protein abundance increases in response to DNA replication stress	chrII	100371	101156
2				12	32	33	22
1	YBL065W		345	1611	3313	1422	321	Dubious open reading frame; unlikely to encode a functional protein, based on available experimental and comparative sequence data; partially overlaps verified ORF SEF1/YBL066C; YBL065W is a non-essential gene	chrII	99963	100307
2				21	42	30	10
1	YBL066C	SEF1	3447	4528	6400	3902	1814	Putative transcription factor; has homolog in Kluyveromyces lactis	chrII	96669	100115
2				31	124	110	52
1	YBL067C	UBP13	2244	6697	2583	3006	6283	Ubiquitin-specific protease that cleaves Ub-protein fusions; UBP13 has a paralog, UBP9, that arose from the whole genome duplication	chrII	93639	95882
2				21	52	43	30
1	YBL068W	PRS4	981	1281	2238	1616	319	5-phospho-ribosyl-1(alpha)-pyrophosphate synthetase, synthesizes PRPP; which is required for nucleotide, histidine, and tryptophan biosynthesis; one of five related enzymes, which are active as heteromultimeric complexes; PRS4 has a paralog, PRS2, that arose from the whole genome duplication; a missense mutation in the conserved residue R196 of its human homolog PRPS1 is pathogenic	chrII	92414	93394
2				14	34	27	10
1	YBL068W-A		237	2478	1455	420	198	Dubious open reading frame; unlikely to encode a functional protein, based on available experimental and comparative sequence data; identified by fungal homology and RT-PCR	chrII	91794	92030
2				6	12	6	5
1	YBL069W	AST1	1290	18483	6139	4279	2708	Lipid raft associated protein; interacts with the plasma membrane ATPase Pma1p and has a role in its targeting to the plasma membrane by influencing its incorporation into lipid rafts; sometimes classified in the medium-chain dehydrogenase/reductases (MDRs) superfamily; AST1 has a paralog, AST2, that arose from the whole genome duplication	chrII	90741	92030
2				24	60	40	35
1	YBL070C		321	2719	997	581	629	Dubious open reading frame; unlikely to encode a functional protein, based on available experimental and comparative sequence data	chrII	90605	90925
2				6	14	11	10
1	YBL071C		309	872	601	874	287	Putative protein of unknown function; conserved among S. cerevisiae strains; YBL071C is not an essential gene	chrII	90223	90531
2				5	12	15	5
1	YBL071C-B		99	65	95	47	3	Putative protein of unknown function; identified by gene-trapping, microarray-based expression analysis, and genome-wide homology searching	chrII	89458	89556
2				4	10	4	1
1	YBL071W-A	KTI11	249	93	106	56	49	Zn-ribbon protein that co-purifies with Dph1 and Dph2; in a complex required for synthesis of diphthamide on translation factor eEF2 and with Elongator subunits Iki3p, Elp2p, and Elp3p; involved in modification of wobble nucleosides in tRNAs; forms a stable heterodimer with Ats1p	chrII	89978	90226
2				3	4	2	2
1	YBL072C	RPS8A	603	31	557	193	91	Protein component of the small (40S) ribosomal subunit; homologous to mammalian ribosomal protein S8, no bacterial homolog; RPS8A has a paralog, RPS8B, that arose from the whole genome duplication	chrII	88523	89125
2				2	18	17	7
1	YBL073W		312	1205	3561	5788	2754	Dubious open reading frame; unlikely to encode a functional protein, based on available experimental and comparative sequence data; partially overlaps the essential gene AAR2/YBL074C	chrII	87646	87957
2				11	27	24	17
1	YBL074C	AAR2	1068	2438	1208	1179	1050	Component of the U5 snRNP complex; required for splicing of U3 precursors; originally described as a splicing factor specifically required for splicing pre-mRNA of the MATa1 cistron	chrII	86722	87789
2				3	12	13	8
1	YBL075C	SSA3	1950	1291	3342	3178	1832	ATPase involved in protein folding and the response to stress; plays a role in SRP-dependent cotranslational protein-membrane targeting and translocation; member of the heat shock protein 70 (HSP70) family; localized to the cytoplasm; SSA3 has a paralog, SSA4, that arose from the whole genome duplication	chrII	84499	86448
2				15	68	55	32
1	YBL076C	ILS1	3219	21	43	10	1	Cytoplasmic isoleucine-tRNA synthetase; target of the G1-specific inhibitor reveromycin A	chrII	81043	84261
2				2	9	4	1
1	YBL077W		432	5133	3259	3961	2573	Dubious open reading frame; unlikely to encode a functional protein, based on available experimental and comparative sequence data; partially overlaps the verified gene ILS1/YBL076C	chrII	80897	81328
2				13	26	28	15
1	YBL078C	ATG8	354	85	17	528	0	Component of autophagosomes and Cvt vesicles; regulator of Atg1p, targets it to autophagosomes; binds the Atg1p-Atg13p complex, triggering its vacuolar degradation; unique ubiquitin-like protein whose conjugation target is lipid phosphatidylethanolamine (PE); Atg8p-PE is anchored to membranes, is involved in phagophore expansion, and may mediate membrane fusion during autophagosome formation; dec…	chrII	80378	80731
2				4	8	7	0
1	YBL079W	NUP170	4509	200	3184	1228	241	Subunit of inner ring of nuclear pore complex (NPC); contributes to NPC assembly and nucleocytoplasmic transport; interacts with genomic regions that contain ribosomal protein and subtelomeric genes, where it functions in nucleosome positioning and as a repressor of transcription; both Nup170p and NUP157p are similar to human Nup155p; NUP170 has a paralog, NUP157, that arose from the whole genome…	chrII	75259	79767
2				3	66	49	14
1	YBL080C	PET112	1626	572	24	13	58	Subunit of the trimeric GatFAB AmidoTransferase(AdT) complex; involved in the formation of Q-tRNAQ; mutation is functionally complemented by the bacterial GatB ortholog	chrII	73070	74695
2				6	5	5	5
1	YBL081W		1107	29	3434	4290	16338	Non-essential protein of unknown function; null mutation results in a decrease in plasma membrane electron transport	chrII	71866	72972
2				1	46	45	45
1	YBL082C	ALG3	1377	403	1533	2650	3373	Dolichol-P-Man dependent alpha(1-3) mannosyltransferase; involved in synthesis of dolichol-linked oligosaccharide donor for N-linked glycosylation of proteins; G353A missense mutation in human ortholog ALG3 implicated in carbohydrate deficient glycoprotein syndrome type IV, which is characterized by microcephaly, severe epilepsy, minimal psychomotor development, partial deficiency of sialic acids…	chrII	69751	71127
2				2	8	7	5
1	YBL083C		426	38	295	235	9	Dubious open reading frame; unlikely to encode a functional protein, based on available experimental and comparative sequence data; overlaps verified ORF ALG3	chrII	69713	70138
2				1	3	4	3
1	YBL084C	CDC27	2277	37	82	264	57	Subunit of the Anaphase-Promoting Complex/Cyclosome (APC/C); APC/C is a ubiquitin-protein ligase required for degradation of anaphase inhibitors, including mitotic cyclins, during the metaphase/anaphase transition	chrII	67169	69445
2				1	6	7	6
1	YBL085W	BOI1	2943	3393	6249	10506	3150	Protein implicated in polar growth; functionally redundant with Boi2p; interacts with bud-emergence protein Bem1p; contains an SH3 (src homology 3) domain and a PH (pleckstrin homology) domain; relocalizes from bud neck to cytoplasm upon DNA replication stress; BOI1 has a paralog, BOI2, that arose from the whole genome duplication	chrII	63876	66818
2				18	81	65	33
1	YBL086C		1401	10325	4543	3257	1882	Protein of unknown function; green fluorescent protein (GFP)-fusion protein localizes to the cell periphery	chrII	61202	62602
2				13	36	30	19
1	YBL087C	RPL23A	918	3311	1960	4317	5875	Ribosomal 60S subunit protein L23A; homologous to mammalian ribosomal protein L23 and bacterial L14; RPL23A has a paralog, RPL23B, that arose from the whole genome duplication	chrII	59822	60739
2				17	37	48	31
3				2589	5558	3164	13730
4				10	42	29	33
1	YBL088C	TEL1	8364	7361	13814	12307	13803	Protein kinase primarily involved in telomere length regulation; contributes to cell cycle checkpoint control in response to DNA damage; acts with Red1p and Mec1p to promote interhomolog recombination by phosphorylation of Hop1; functionally redundant with Mec1p; regulates P-body formation induced by replication stress; homolog of human ataxia-telangiectasia mutated (ATM) gene	chrII	51019	59382
2				51	200	159	104
1	YBL089W	AVT5	1380	13658	6456	5795	4143	Putative transporter; member of a family of seven S. cerevisiae genes (AVT1-7) related to vesicular GABA-glycine transporters; AVT5 has a paralog, AVT6, that arose from the whole genome duplication	chrII	49574	50953
2				25	86	74	25
1	YBL090W	MRP21	534	0	0	24	60	Mitochondrial ribosomal protein of the small subunit; MRP21 exhibits genetic interactions with mutations in the COX2 and COX3 mRNA 5'-untranslated leader sequences	chrII	48825	49358
2				0	0	1	2
1	YBL091C	MAP2	1266	16804	3832	1024	1499	Methionine aminopeptidase; catalyzes the cotranslational removal of N-terminal methionine from nascent polypeptides; function is partially redundant with that of Map1p	chrII	47363	48628
2				18	38	30	26
1	YBL091C-A	SCS22	616	1633	2201	2210	1443	Protein involved in regulation of phospholipid metabolism; one of 6 proteins (Ist2p, Scs2p, Scs22p, Tcb1p, Tcb2p, Tcb3p) that connect the ER and plasma membrane (PM); regulates PM PI4P levels by controlling access of the Sac1p phosphatase to its substrate, PI4P; human VAP homolog; similar to D. melanogaster inturned protein; SWAT-GFP and mCherry fusion proteins localize to the cytosol; SCS22 has …	chrII	46565	47180
2				12	40	28	17
3				582	131	5	65
4				2	3	1	3
1	YBL092W	RPL32	393	33	0	0	12	Ribosomal 60S subunit protein L32; overexpression disrupts telomeric silencing; homologous to mammalian ribosomal protein L32, no bacterial homolog	chrII	45978	46370
2				1	0	0	1
1	YBL093C	ROX3	663	0	590	4306	4434	Subunit of the RNA polymerase II mediator complex; associates with core polymerase subunits to form the RNA polymerase II holoenzyme	chrII	44256	44918
2				0	15	20	10
1	YBL094C		333	557	1081	1215	1103	Dubious open reading frame; unlikely to encode a functional protein, based on available experimental and comparative sequence data; partially overlaps uncharacterized ORF YBL095W	chrII	43765	44097
2				4	10	9	5
1	YBL095W	MRX3	813	1160	3290	3281	1337	Protein that associates with mitochondrial ribosome; likely functions in cristae junction formation; the authentic, non-tagged protein is detected in highly purified mitochondria in high-throughput studies	chrII	43277	44089
2				12	41	41	13
1	YBL096C		309	1511	2945	2248	1105	Non-essential protein of unknown function	chrII	43174	43482
2				16	31	31	10
1	YBL097W	BRN1	2265	851	1714	1308	480	Subunit of the condensin complex; required for chromosome condensation and for clustering of tRNA genes at the nucleolus; may influence multiple aspects of chromosome transmission	chrII	40831	43095
2				3	9	9	3
1	YBL098W	BNA4	1383	4009	4409	4171	1856	Kynurenine 3-monooxygenase; required for the de novo biosynthesis of NAD from tryptophan via kynurenine; expression regulated by Hst1p; putative therapeutic target for Huntington disease	chrII	39145	40527
2				17	50	56	30
1	YBL099W	ATP1	1638	163	469	426	101	Alpha subunit of the F1 sector of mitochondrial F1F0 ATP synthase; which is a large, evolutionarily conserved enzyme complex required for ATP synthesis; F1 translationally regulates ATP6 and ATP8 expression to achieve a balanced output of ATP synthase genes encoded in nucleus and mitochondria; phosphorylated; N-terminally propionylated in vivo	chrII	37053	38690
2				4	5	3	4
1	YBL100C		315	0	0	0	0	Dubious open reading frame; unlikely to encode a functional protein, based on available experimental and comparative sequence data; almost completely overlaps the 5' end of ATP1	chrII	36989	37303
2				0	0	0	0
1	YBL100W-A		1317	80665	95246	73524	53446	Retrotransposon TYA Gag gene co-transcribed with TYB Pol; translated as TYA or TYA-TYB polyprotein; Gag is a nucleocapsid protein that is the structural constituent of virus-like particles (VLPs); similar to retroviral Gag	chrII	29935	31251
2				179	360	297	233
1	YBL100W-B		5314	205004	179175	169756	92108	Retrotransposon TYA Gag and TYB Pol genes; transcribed/translated as one unit; polyprotein is processed to make a nucleocapsid-like protein (Gag), reverse transcriptase (RT), protease (PR), and integrase (IN); similar to retroviral genes	chrII	29935	35248
2				441	951	829	580
1	YBL100W-C		120	1903	3614	4669	2946	Putative protein of unknown function; identified by gene-trapping, microarray-based expression analysis, and genome-wide homology searching	chrII	28427	28546
2				4	18	18	10
1	YBL101C	ECM21	3354	12283	22909	20986	14069	Protein involved in regulating endocytosis of plasma membrane proteins; identified as a substrate for ubiquitination by Rsp5p and deubiquitination by Ubp2p; promoter contains several Gcn4p binding elements; ECM21 has a paralog, CSR2, that arose from the whole genome duplication	chrII	24946	28299
2				41	166	150	86
1	YBL102W	SFT2	648	7079	14961	11533	3487	Tetra-spanning membrane protein found mostly in the late Golgi; non-essential; can suppress some sed5 alleles; may be part of the transport machinery, but precise function is unknown; similar to mammalian syntaxin 5	chrII	24098	24745
2				22	73	56	19
1	YBL103C	RTG3	1461	124	1846	1132	288	bHLH/Zip transcription factor for retrograde (RTG) and TOR pathways; forms a complex with another bHLH/Zip protein, Rtg1p, to activate the pathways; target of Hog1p	chrII	22076	23536
2				6	37	40	13
1	YBL104C	SEA4	3117	17811	14836	11943	4514	Subunit of SEACAT, a subcomplex of the SEA complex; Sea4p, along with Rtc1p and Mtc5p, redundantly inhibit the TORC1 inhibitory role of the Iml1p/SEACIT (Iml1p-Npr2p-Npr3p) subcomplex, a GAP for GTPase Gtr1p (EGOC subunit) in response to amino acid limitation, thereby resulting in activation of TORC1 signaling; SEA is a coatomer-related complex that associates dynamically with the vacuole; contai…	chrII	18177	21293
2				41	117	74	58
1	YBL105C	PKC1	3456	0	195	24	0	Protein serine/threonine kinase; essential for cell wall remodeling during growth; localized to sites of polarized growth and the mother-daughter bud neck; homolog of the alpha, beta, and gamma isoforms of mammalian protein kinase C (PKC)	chrII	14241	17696
2				0	5	8	0
1	YBL106C	SRO77	3033	3179	10034	10031	8803	Protein with roles in exocytosis and cation homeostasis; functions in docking and fusion of post-Golgi vesicles with plasma membrane; regulates cell proliferation and colony development via the Rho1-Tor1 pathway; interacts with SNARE protein Sec9p; homolog of Drosophila lethal giant larvae tumor suppressor; SRO77 has a paralog, SRO7, that arose from the whole genome duplication	chrII	10847	13879
2				17	79	67	59
1	YBL107C	MIX23	591	2557	4524	2163	2878	Mitochondrial intermembrane space protein of unknown function; imported via the MIA import machinery; contains an unusual twin cysteine motif (CX13C CX14C)	chrII	9961	10551
2				19	37	30	23
1	YBL107W-A		105	3505	3688	1852	1742	Dubious open reading frame; unlikely to encode a functional protein, based on available experimental and comparative sequence data; completely overlaps the Ty2 LTR YBLWdelta2; YBL107W-A has a paralog, YER138W-A, that arose from a single-locus duplication	chrII	9268	9372
2				7	10	9	8
1	YBL108C-A	PAU9	129	6037	6389	6706	6281	Protein of unknown function; member of the seripauperin multigene family encoded mainly in subtelomeric regions; SWAT-GFP and mCherry fusion proteins localize to the endoplasmic reticulum and vacuole respectively	chrII	7605	7733
2				9	15	13	11
1	YBL108W		306	52801	99751	61942	32958	Dubious open reading frame; unlikely to encode a functional protein, based on available experimental and comparative sequence data	chrII	8177	8482
2				35	76	69	47
1	YBL109W		336	79671	55772	46620	27086	Dubious open reading frame; unlikely to encode a functional protein, based on available experimental and comparative sequence data	chrII	5790	6125
2				74	124	121	89
1	YBL111C		2103	251545	233251	213079	149732	Helicase-like protein encoded within the telomeric Y' element; relocalizes from mitochondrion to cytoplasm upon DNA replication stress	chrII	2907	5009
2				166	324	294	202
3				3227	3038	2866	1431
4				8	20	16	8
1	YBL112C		318	4160	1864	3306	1966	Putative protein of unknown function; YBL112C is contained within TEL02L	chrII	2582	2899
2				12	26	21	27
1	YBL113C		2379	41609	36560	25536	18783	Helicase-like protein encoded within the telomeric Y' element	chrII	280	2658
2				152	261	234	164
1	YBL113W-A		483	4878	7810	2896	1530	Dubious open reading frame; unlikely to encode a functional protein, based on available experimental and comparative sequence data; identified by gene-trapping, microarray-based expression analysis, and genome-wide homology searching	chrII	646	1128
2				23	38	38	19
1	YBR001C	NTH2	2343	32155	16881	16103	11754	Putative neutral trehalase, required for thermotolerance; may mediate resistance to other cellular stresses; NTH2 has a paralog, NTH1, that arose from the whole genome duplication	chrII	238941	241283
2				80	158	162	124
1	YBR002C	RER2	861	3478	1398	1551	2100	Forms the dehydrodolichyl diphosphate syntase (DDS) complex with NUS1; major enzyme of polyprenol synthesis in both the endoplasmic reticulum (ER) and in lipid droplets; participates in ER protein sorting; human ortholog DHDDS functionally complements the heat sensitive growth defect of a ts allele, and is associated with retinitis pigmentosa	chrII	241708	242568
2				5	9	9	12
1	YBR003W	COQ1	1422	793	598	2	83	Hexaprenyl pyrophosphate synthetase; catalyzes the first step in ubiquinone (coenzyme Q) biosynthesis	chrII	242809	244230
2				22	6	1	5
1	YBR004C	GPI18	1302	0	12	106	0	Functional ortholog of human PIG-V; PIG-V is a mannosyltransferase that transfers the second mannose in glycosylphosphatidylinositol biosynthesis; the authentic, non-tagged protein was localized to mitochondria	chrII	244366	245667
2				0	2	1	0
1	YBR005W	RCR1	642	3682	2249	2185	1443	Protein of the ER membrane involved in cell wall chitin deposition; may function in the endosomal-vacuolar trafficking pathway, helping determine whether plasma membrane proteins are degraded or routed to the plasma membrane; RCR1 has a paralog, RCR2, that arose from the whole genome duplication	chrII	245906	246547
2				12	29	30	17
1	YBR006W	UGA2	1494	9873	8128	8931	7365	Succinate semialdehyde dehydrogenase; involved in the utilization of gamma-aminobutyrate (GABA) as a nitrogen source; part of the 4-aminobutyrate and glutamate degradation pathways; localized to the cytoplasm	chrII	247010	248503
2				50	104	88	70
1	YBR007C	DSF2	2211	28632	7224	8073	2385	Deletion suppressor of mpt5 mutation; relocalizes from bud neck to cytoplasm upon DNA replication stress	chrII	248806	251016
2				33	69	69	39
1	YBR008C	FLR1	1647	14770	8078	6652	17525	Plasma membrane transporter of the major facilitator superfamily; member of the 12-spanner drug:H(+) antiporter DHA1 family; involved in efflux of fluconazole, diazaborine, benomyl, methotrexate, and other drugs; expression induced in cells treated with the mycotoxin patulin; relocalizes from nucleus to plasma membrane upon DNA replication stress	chrII	252563	254209
2				34	74	67	47
1	YBR009C	HHF1	312	236	824	1234	565	Histone H4; core histone protein required for chromatin assembly and chromosome function; one of two identical histone proteins (see also HHF2); contributes to telomeric silencing; N-terminal domain involved in maintaining genomic integrity	chrII	255373	255684
2				6	21	19	15
1	YBR010W	HHT1	411	2173	1769	1564	710	Histone H3; core histone protein required for chromatin assembly, part of heterochromatin-mediated telomeric and HM silencing; one of two identical histone H3 proteins (see HHT2); regulated by acetylation, methylation, and phosphorylation; H3K14 acetylation plays an important role in the unfolding of strongly positioned nucleosomes during repair of UV damage	chrII	256331	256741
2				19	38	29	22
1	YBR011C	IPP1	864	21	39	4	38	Cytoplasmic inorganic pyrophosphatase (PPase); homodimer that catalyzes the rapid exchange of oxygens from Pi with water, highly expressed and essential for viability, active-site residues show identity to those from E. coli PPase	chrII	257112	257975
2				1	3	2	2
1	YBR012C		420	0	0	0	0	Dubious open reading frame; unlikely to encode a functional protein, based on available experimental and comparative sequence data; expression induced by iron-regulated transcriptional activator Aft2p	chrII	259147	259566
2				0	0	0	0
1	YBR012W-A		1323	27499	23772	30621	11454	Retrotransposon TYA Gag gene co-transcribed with TYB Pol; translated as TYA or TYA-TYB polyprotein; Gag is a nucleocapsid protein that is the structural constituent of virus-like particles (VLPs); similar to retroviral Gag	chrII	259869	261191
2				92	113	119	68
1	YBR012W-B		5272	50134	35389	46373	19753	Retrotransposon TYA Gag and TYB Pol genes; transcribed/translated as one unit; polyprotein is processed to make a nucleocapsid-like protein (Gag), reverse transcriptase (RT), protease (PR), and integrase (IN); similar to retroviral genes	chrII	259869	265140
2				196	290	311	166
1	YBR013C		390	0	0	1	0	Putative protein of unknown function; haploid deletion mutant exhibits synthetic phenotype with alpha-synuclein; SWAT-GFP fusion protein localizes to the endoplasmic reticulum while mCherry fusion protein localizes to both the endoplasmic reticulum and vacuole	chrII	265492	265881
2				0	0	1	0
1	YBR014C	GRX7	612	1685	1267	258	510	Cis-golgi localized monothiol glutaredoxin; more similar in activity to dithiol than other monothiol glutaredoxins; involved in the oxidative stress response; does not bind metal ions; GRX7 has a paralog, GRX6, that arose from the whole genome duplication	chrII	266725	267336
2				7	26	9	10
1	YBR015C	MNN2	1794	6060	2326	2109	2417	Alpha-1,2-mannosyltransferase; responsible for addition of the first alpha-1,2-linked mannose to form the branches on the mannan backbone of oligosaccharides, localizes to an early Golgi compartment	chrII	267710	269503
2				26	48	42	26
1	YBR016W		387	2926	2923	2073	1459	Tail-anchored plasma membrane protein with a conserved CYSTM module; predicted to be palmitoylated; has similarity to hydrophilins, which are involved in the adaptive response to hyperosmotic conditions; YBR016W has a paralog, YDL012C, that arose from the whole genome duplication	chrII	270247	270633
2				11	28	23	19
1	YBR017C	KAP104	2757	0	978	632	129	Transportin or cytosolic karyopherin beta 2; functions in the rg-nuclear localization signal-mediated nuclear import/reimport of mRNA-binding proteins Nab2p and Hrp1p; regulates asymmetric protein synthesis in daughter cells during mitosis	chrII	270947	273703
2				0	9	5	2
1	YBR018C	GAL7	1101	146	139	1412	66	Galactose-1-phosphate uridyl transferase; synthesizes glucose-1-phosphate and UDP-galactose from UDP-D-glucose and alpha-D-galactose-1-phosphate in the second step of galactose catabolism; human homolog UGP2 can complement yeast null mutant	chrII	274427	275527
2				1	6	9	2
1	YBR019C	GAL10	2100	280	1692	9212	13014	UDP-glucose-4-epimerase; catalyzes interconversion of UDP-galactose and UDP-D-glucose in galactose metabolism; also catalyzes conversion of alpha-D-glucose or alpha-D-galactose to their beta-anomers; human homolog GALE implicated in galactosemia, can complement yeast null mutant	chrII	276253	278352
2				9	35	52	39
1	YBR020W	GAL1	1587	8071	21655	47185	11449	Galactokinase; phosphorylates alpha-D-galactose to alpha-D-galactose-1-phosphate in the first step of galactose catabolism; expression regulated by Gal4p; human homolog GALK2 complements yeast null mutant; GAL1 has a paralog, GAL3, that arose from the whole genome duplication	chrII	279021	280607
2				62	224	260	107
1	YBR021W	FUR4	1902	30	40	550	0	Plasma membrane localized uracil permease; expression is tightly regulated by uracil levels and environmental cues; conformational alterations induced by unfolding or substrate binding result in Rsp5p-mediated ubiquitination and degradation	chrII	281443	283344
2				1	5	6	0
1	YBR022W	POA1	534	722	2147	1369	3848	Phosphatase that is highly specific for ADP-ribose 1''-phosphate; a tRNA splicing metabolite; may have a role in regulation of tRNA splicing	chrII	283738	284271
2				11	35	29	19
1	YBR023C	CHS3	3498	24	9180	1018	3150	Chitin synthase III; catalyzes the transfer of N-acetylglucosamine (GlcNAc) to chitin; required for synthesis of the majority of cell wall chitin, the chitin ring during bud emergence, and spore wall chitosan; contains overlapping di-leucine and di-acidic signals that mediate, respectively, intracellular trafficking by AP-1 and trafficking to plasma membrane by exomer complex; requires AP-3 compl…	chrII	284428	287925
2				3	121	75	73
1	YBR024W	SCO2	906	2746	2374	923	1881	Protein anchored to mitochondrial inner membrane; may have a redundant function with Sco1p in delivery of copper to cytochrome c oxidase; interacts with Cox2p; SCO2 has a paralog, SCO1, that arose from the whole genome duplication	chrII	289445	290350
2				15	34	31	22
1	YBR025C	OLA1	1185	2658	680	1690	459	P-loop ATPase with similarity to human OLA1 and bacterial YchF; identified as specifically interacting with the proteasome; null mutant displays increased translation rate and increased readthrough of premature stop codons; protein abundance increases in response to hydrogen peroxide and to DNA replication stress	chrII	290681	291865
2				25	41	41	15
1	YBR026C	ETR1	1143	22	21	47	72	2-enoyl thioester reductase; member of the medium chain dehydrogenase/reductase family; localized to mitochondria, where it has a probable role in fatty acid synthesis; human MECR functionally complements the respiratory growth defect of the null mutant	chrII	292877	294019
2				4	4	17	11
1	YBR027C		333	4796	10427	6134	7074	Putative protein of unknown function; conserved among S. cerevisiae strains; YBR027C is not an essential gene	chrII	294024	294356
2				27	61	44	37
1	YBR028C	YPK3	1578	11254	3940	1358	1937	AGC kinase; phosphorylated by cAMP-dependent protein kinase (PKA) in a TORC1-dependent manner; directly phosphorylated by TORC1; phosphorylates ribosomal protein Rps6a/b (S6), in a TORC-dependent manner; undergoes autophosphorylation	chrII	294425	296002
2				19	61	43	32
1	YBR029C	CDS1	1374	200	145	311	403	Phosphatidate cytidylyltransferase (CDP-diglyceride synthetase); an enzyme that catalyzes that conversion of CTP + phosphate into diphosphate + CDP-diaclglyerol, a critical step in the synthesis of all major yeast phospholipids; human homolog CDS1 can complement yeast cds1 null mutant	chrII	296369	297742
2				1	10	2	4
1	YBR030W	RKM3	1659	7701	5687	9044	13247	Ribosomal lysine methyltransferase; specific for monomethylation of Rpl42ap and Rpl42bp (lysine 40); nuclear SET domain containing protein; relocalizes to the cytosol in response to hypoxia	chrII	298292	299950
2				21	78	58	37
1	YBR031W	RPL4A	1089	22041	15082	21905	16216	Ribosomal 60S subunit protein L4A; N-terminally acetylated; homologous to mammalian ribosomal protein L4 and bacterial L4; RPL4A has a paralog, RPL4B, that arose from the whole genome duplication	chrII	300166	301254
2				64	106	112	79
1	YBR032W		303	40164	23703	27969	27933	Putative protein of unknown function; conserved among S. cerevisiae strains; YBR032W is not an essential gene	chrII	301519	301821
2				61	101	91	69
1	YBR033W	EDS1	2760	12053	15854	11441	6934	Putative zinc cluster protein, predicted to be a transcription factor; not an essential gene; EDS1 has a paralog, RGT1, that arose from the whole genome duplication	chrII	301944	304703
2				57	139	126	84
1	YBR034C	HMT1	1047	1608	7717	27245	52611	Nuclear SAM-dependent mono- and asymmetric methyltransferase; modifies hnRNPs, including Npl3p and Hrp1p, affecting their activity and nuclear export; methylates U1 snRNP protein Snp1p, ribosomal protein Rps2p, and histones H3 and H4; interacts genetically with genes encoding components of Rpd3(L) and this interaction is important for Rpd3 recruitment to the subtelomeric region	chrII	304930	305976
2				22	66	70	63
1	YBR035C	PDX3	687	0	3	0	0	Pyridoxine (pyridoxamine) phosphate oxidase; has homologs in E. coli and Myxococcus xanthus; transcription is under the general control of nitrogen metabolism	chrII	306269	306955
2				0	1	0	0
1	YBR036C	CSG2	1233	0	29	54	0	Endoplasmic reticulum membrane protein; required for mannosylation of inositolphosphorylceramide and for growth at high calcium concentrations; protein abundance increases in response to DNA replication stress	chrII	309081	310313
2				0	1	2	0
1	YBR037C	SCO1	888	3113	331	4	56	Copper-binding protein of mitochondrial inner membrane; required for cytochrome c oxidase activity and respiration; may function to deliver copper to cytochrome c oxidase; similar to thioredoxins; SCO1 has a paralog, SCO2, that arose from the whole genome duplication	chrII	310565	311452
2				7	5	2	1
1	YBR038W	CHS2	2892	0	71	333	15	Chitin synthase II; catalyzes transfer of N-acetylglucosamine (GlcNAc) to chitin upon activation of zymogenic form; required for chitin synthesis in the primary septum during cytokinesis; localization regulated by Cdk1p during mitosis; phosphorylation by Dbf2p kinase regulates its dynamics and chitin synthesis during cytokinesis	chrII	311898	314789
2				0	4	3	3
1	YBR039W	ATP3	936	0	0	0	0	Gamma subunit of the F1 sector of mitochondrial F1F0 ATP synthase; F1F0 ATP synthase is a large, evolutionarily conserved enzyme complex required for ATP synthesis	chrII	315575	316510
2				0	0	0	0
1	YBR040W	FIG1	897	415	743	326	556	Integral membrane protein required for efficient mating; may participate in or regulate the low affinity Ca2+ influx system, which affects intracellular signaling and cell-cell fusion during mating	chrII	316968	317864
2				3	18	12	8
1	YBR041W	FAT1	2010	268	71	816	102	Very long chain fatty acyl-CoA synthetase and fatty acid transporter; activates imported fatty acids with a preference for very long lengths (C20-C26); has a separate function in the transport of long chain fatty acids	chrII	318266	320275
2				10	13	34	7
1	YBR042C	CST26	1194	2214	2282	1421	667	Acyltransferase; enzyme mainly responsible for the introduction of saturated very long chain fatty acids into neo-synthesized molecules of phosphatidylinositol; required for incorporation of stearic acid into phosphatidylinositol; affects chromosome stability when overexpressed; CST26 has a paralog, YDR018C, that arose from the whole genome duplication	chrII	320416	321609
2				16	55	35	13
1	YBR043C	QDR3	2070	2388	2958	6448	3135	Multidrug transporter of the major facilitator superfamily; member of the 12-spanner drug:H(+) antiporter DHA1 family; has a role in polyamine homeostasis; involved in spore wall asembly; sequence similarity to DTR1 and QDR1, and the triple mutant dtr1 qdr1 qdr3 exhibits reduced dityrosine fluorescence relative to the single mutants; expression is upregulated under polyamine stress; required for …	chrII	321876	323945
2				28	69	73	46
1	YBR044C	TCM62	1719	52072	16964	45531	138022	Protein involved in assembly of the succinate dehydrogenase complex; mitochondrial; putative chaperone	chrII	324341	326059
2				60	128	142	120
1	YBR045C	GIP1	1920	5115	5240	2757	1549	Meiosis-specific regulatory subunit of the Glc7p protein phosphatase; regulates spore wall formation and septin organization, required for expression of some late meiotic genes and for normal localization of Glc7p	chrII	328173	330092
2				18	57	40	27
1	YBR046C	ZTA1	1005	2833	6446	4499	1433	NADPH-dependent quinone reductase; GFP-tagged protein localizes to the cytoplasm and nucleus; has similarity to E. coli quinone oxidoreductase and to human zeta-crystallin	chrII	330507	331511
2				21	46	36	30
1	YBR047W	FMP23	528	3373	5020	5584	872	Putative protein of unknown function; proposed to be involved in iron or copper homeostasis; the authentic, non-tagged protein is detected in highly purified mitochondria in high-throughput studies	chrII	331833	332360
2				22	60	57	21
1	YBR048W	RPS11B	982	207	524	187	140	Protein component of the small (40S) ribosomal subunit; homologous to mammalian ribosomal protein S11 and bacterial S17; RPS11B has a paralog, RPS11A, that arose from the whole genome duplication	chrII	332831	333812
2				8	27	23	11
3				70	260	155	145
4				2	14	8	8
1	YBR049C	REB1	2433	0	11	37	8	RNA polymerase I enhancer binding protein; DNA binding protein that binds to genes transcribed by both RNA polymerase I and RNA polymerase II; required for termination of RNA polymerase I transcription; Reb1p bound to DNA acts to block RNA polymerase II readthrough transcription	chrII	334386	336818
2				0	3	3	1
1	YBR050C	REG2	1017	853	2414	1304	1484	Regulatory subunit of the Glc7p type-1 protein phosphatase; involved with Reg1p, Glc7p, and Snf1p in regulation of glucose-repressible genes, also involved in glucose-induced proteolysis of maltose permease; REG2 has a paralog, REG1, that arose from the whole genome duplication	chrII	337183	338199
2				12	33	31	20
1	YBR051W		351	1875	2909	2102	1961	Dubious open reading frame; unlikely to encode a functional protein, based on available experimental and comparative sequence data; partially overlaps the REG2/YBR050C regulatory subunit of the Glc7p type-1 protein phosphatase	chrII	337988	338338
2				12	35	32	27
1	YBR052C	RFS1	633	4934	3857	4399	2273	Protein of unknown function; member of a flavodoxin-like fold protein family that includes Pst2p and Ycp4p; green fluorescent protein (GFP)-fusion protein localizes to the cytoplasm in a punctate pattern; RFS1 has a paralog, PST2, that arose from the whole genome duplication	chrII	338720	339352
2				23	50	47	23
1	YBR053C		1077	6600	3760	2834	1908	Putative protein of unknown function; induced by cell wall perturbation	chrII	339675	340751
2				17	50	37	24
1	YBR054W	YRO2	1035	33945	11841	13124	2460	Protein with a putative role in response to acid stress; null mutant is sensitive to acetic acid; transcription is regulated by Haa1p and induced in the presence of acetic acid; protein observed in plasma membrane foci in the presence of acetic acid; the authentic, non-tagged protein is detected in a phosphorylated state in highly purified mitochondria in high-throughput studies	chrII	343101	344135
2				22	97	95	30
1	YBR055C	PRP6	2700	266	2445	1312	606	Splicing factor; component of the U4/U6-U5 snRNP complex	chrII	344602	347301
2				5	30	20	10
1	YBR056C-B		159	227	161	402	44	Dubious open reading frame; unlikely to encode a functional protein, based on available experimental and comparative sequence data; almost completely overlaps the dubious ORF YBR056W-A	chrII	351293	351451
2				4	11	11	2
1	YBR056W		1506	890	300	159	766	Putative glycoside hydrolase of the mitochondrial intermembrane space	chrII	347879	349384
2				16	21	23	16
1	YBR056W-A		201	379	620	430	115	Protein of unknown function; mRNA identified as translated by ribosome profiling data; partially overlaps dubious ORF YBR056C-B; YBR056W-A has a paralog, YDR034W-B, that arose from the whole genome duplication	chrII	351255	351455
2				6	16	14	4
1	YBR057C	MUM2	1101	901	1784	1079	1095	Protein essential for meiotic DNA replication and sporulation; cytoplasmic protein; subunit of the MIS complex which controls mRNA methylation during during the induction of sporulation; also interacts with Orc2p, which is a component of the origin recognition complex	chrII	352193	353293
2				8	33	21	15
1	YBR058C	UBP14	2346	0	501	19	259	Ubiquitin-specific protease; specifically disassembles unanchored ubiquitin chains; involved in fructose-1,6-bisphosphatase (Fbp1p) degradation; similar to human isopeptidase T	chrII	353672	356017
2				0	32	7	12
1	YBR058C-A	TSC3	243	255	3	13	11	Protein that stimulates the activity of serine palmitoyltransferase; involved in sphingolipid biosynthesis; Lcb1p and Lcb2p are the two components of serine palmitoyltransferase	chrII	356324	356566
2				1	1	1	1
1	YBR059C	AKL1	3327	20453	3021	5957	6450	Ser-Thr protein kinase; member (with Ark1p and Prk1p) of the Ark kinase family; involved in endocytosis and actin cytoskeleton organization	chrII	356861	360187
2				31	90	113	62
1	YBR060C	ORC2	1863	41	80	231	38	Subunit of the origin recognition complex (ORC); ORC directs DNA replication by binding to replication origins and is also involved in transcriptional silencing; interacts with Spp1p and with trimethylated histone H3; phosphorylated by Cdc28p	chrII	360652	362514
2				1	5	6	3
1	YBR061C	TRM7	933	1469	1273	467	491	2'-O-ribose methyltransferase; methylates the 2'-O-ribose of tRNA-Phe, tRNA-Trp, and tRNA-Leu at positions C32 and N34 of tRNA anticodon loop; crucial biological role likely modification of tRNA-Phe; interacts with Trm732p and Rtt10p in 2'-O-methylation of C32 and N34 substrate tRNAs, respectively; yeast null mutant can be functionally complemented by human FTSJ1, mutations in which have been imp…	chrII	364787	365719
2				10	42	22	13
1	YBR062C		625	7480	1973	3046	1416	Protein of unknown function that interacts with Msb2p; may play a role in activation of the filamentous growth pathway	chrII	365976	366600
2				11	21	16	16
3				5	13	0	27
4				1	3	0	2
1	YBR063C		1215	3328	960	955	1605	Putative protein of unknown function; YBR063C is not an essential gene	chrII	366970	368184
2				8	22	16	17
1	YBR064W		429	3250	409	235	565	Dubious open reading frame; unlikely to encode a functional protein, based on available experimental and comparative sequence data; partially overlaps the uncharacterized ORF YBR063C	chrII	367763	368191
2				4	9	7	7
1	YBR065C	ECM2	1095	5630	4103	4681	4207	Pre-mRNA splicing factor; facilitates the cooperative formation of U2/U6 helix II in association with stem II in the spliceosome, function may be regulated by Slu7p	chrII	368584	369678
2				16	34	27	20
1	YBR066C	NRG2	663	2666	4869	4539	6322	Transcriptional repressor; mediates glucose repression and negatively regulates filamentous growth; activated in stochastic pulses of nuclear localization in response to low glucose	chrII	370037	370699
2				28	58	51	39
1	YBR067C	TIP1	633	4245	3703	14126	768	Major cell wall mannoprotein with possible lipase activity; transcription is induced by heat- and cold-shock; member of the Srp1p/Tip1p family of serine-alanine-rich proteins	chrII	372103	372735
2				15	29	30	14
1	YBR068C	BAP2	1830	2059	4499	5064	1483	High-affinity leucine permease; functions as a branched-chain amino acid permease involved in uptake of leucine, isoleucine and valine; contains 12 predicted transmembrane domains; BAP2 has a paralog, BAP3, that arose from the whole genome duplication	chrII	373861	375690
2				5	14	15	8
1	YBR069C	TAT1	1860	4803	10861	13069	4450	Amino acid transporter for valine, leucine, isoleucine, and tyrosine; low-affinity tryptophan and histidine transporter; overexpression confers FK506 and FTY720 resistance; protein abundance increases in response to DNA replication stress	chrII	376574	378433
2				42	127	90	61
1	YBR070C	ALG14	714	120	50	6	28	Component of UDP-GlcNAc transferase; required for second step of dolichyl-linked oligosaccharide synthesis; anchors catalytic subunit Alg13p to ER membrane; similar to bacterial and human glycosyltransferases; both human homologs ALG13 and ALG14 are required to complement yeast alg14 mutant	chrII	379221	379934
2				2	3	3	1
1	YBR071W		636	601	2860	2245	1606	Protein of unknown function found in the cytoplasm and bud neck; mRNA expression may be regulated by the cell cycle and/or cell wall stress; overexpression of YBR071W affects endocytic protein trafficking	chrII	380411	381046
2				7	38	32	10
1	YBR072C-A		162	42818	32512	26339	17237	Putative protein of unknown function; identified by fungal homology and RT-PCR	chrII	382860	383021
2				21	56	50	37
1	YBR072W	HSP26	645	3630	9741	5921	4134	Small heat shock protein (sHSP) with chaperone activity; forms hollow, sphere-shaped oligomers that suppress unfolded proteins aggregation; long-lived protein that is preferentially retained in mother cells and forms cytoplasmic foci; oligomer activation requires heat-induced conformational change; also has mRNA binding activity	chrII	382030	382674
2				10	59	28	17
1	YBR073W	RDH54	2877	3110	5356	3651	2512	DNA-dependent ATPase; DNA recombination/repair translocase, supercoils DNA and promotes DNA strand opening; stimulates strand exchange by modifying dsDNA topology; involved in recombinational repair of DNA double-strand breaks (DSBs) during mitosis and meiosis; phosphorylated in Mec1p-, Rad53p-dependent way in response to one DSB; contributes to remodelling of nucleosomes; proposed to be involved…	chrII	383112	385988
2				25	101	78	57
1	YBR074W	PFF1	2931	16148	11458	11726	7883	Multi-spanning vacuolar membrane protease; glycosylated transmembrane protein bearing homology to the M28 family of metalloproteases; has a lumenal-facing protease domain; proposed role in vacuole physiology	chrII	386286	389216
2				32	97	98	60
1	YBR076C-A		267	8460	8958	9096	2592	Dubious open reading frame; unlikely to encode a functional protein, based on available experimental and comparative sequence data; partially overlaps verified gene ECM8; identified by fungal homology and RT-PCR	chrII	391351	391617
2				24	57	46	27
1	YBR076W	ECM8	1065	27617	11831	17947	10729	Non-essential protein of unknown function	chrII	390227	391291
2				26	64	53	31
1	YBR077C	SLM4	489	12960	4016	774	1706	Component of the EGO and GSE complexes; essential for integrity and function of EGO; EGO is involved in the regulation of microautophagy and GSE is required for proper sorting of amino acid permease Gap1p; gene exhibits synthetic genetic interaction with MSS4	chrII	391805	392293
2				47	70	54	39
1	YBR078W	ECM33	1620	0	7	0	10	GPI-anchored protein of unknown function; possible role in apical bud growth; GPI-anchoring on the plasma membrane crucial to function; phosphorylated in mitochondria; similar to Sps2p; ECM33 has a paralog, PST1, that arose from the whole genome duplication	chrII	393123	394742
2				0	1	0	2
3				0	2	5	36
4				0	1	2	6
1	YBR079C	RPG1	2895	0	200	389	520	eIF3a subunit of the eukaryotic translation initiation factor 3 (eIF3); subunit of the core complex of eIF3; essential for translation; part of a Prt1p-Rpg1p-Nip1p subcomplex that stimulates binding of mRNA and tRNA(i)Met to ribosomes; involved in translation reinitiation; eIF3 is also involved in programmed stop codon readthrough	chrII	395383	398277
2				0	14	16	7
1	YBR080C	SEC18	2277	123	126	226	15	AAA ATPase and SNARE disassembly chaperone; required for vesicular transport between ER and Golgi, the 'priming' step in homotypic vacuole fusion, autophagy, and protein secretion; releases Sec17p from SNAP complexes; has similarity to mammalian N-ethylmaleimide-sensitive factor (NSF)	chrII	398614	400890
2				1	4	7	3
1	YBR081C	SPT7	3999	763	1131	437	122	Subunit of the SAGA transcriptional regulatory complex; involved in proper assembly of the complex; also present as a C-terminally truncated form in the SLIK/SALSA transcriptional regulatory complex	chrII	401253	405251
2				4	11	11	5
1	YBR082C	UBC4	542	656	13683	6964	4265	Ubiquitin-conjugating enzyme (E2); key E2 partner with Ubc1p for the anaphase-promoting complex (APC); mediates degradation of abnormal or excess proteins, including calmodulin and histone H3; regulates levels of DNA Polymerase-{alpha} to promote efficient and accurate DNA replication; interacts with many SCF ubiquitin protein ligases; component of the cellular stress response; UBC4 has a paralog…	chrII	406628	407169
2				11	49	40	25
3				0	650	161	169
4				0	9	5	5
1	YBR083W	TEC1	1461	38285	15978	12016	5124	Transcription factor targeting filamentation genes and Ty1 expression; Ste12p activation of most filamentation gene promoters depends on Tec1p and Tec1p transcriptional activity is dependent on its association with Ste12p; binds to TCS elements upstream of filamentation genes, which are regulated by Tec1p/Ste12p/Dig1p complex; competes with Dig2p for binding to Ste12p/Dig1p; positive regulator of…	chrII	409169	410629
2				36	105	98	42
1	YBR084C-A	RPL19A	1076	9566	4323	6349	7707	Ribosomal 60S subunit protein L19A; rpl19a and rpl19b single null mutations result in slow growth, while the double null mutation is lethal; homologous to mammalian ribosomal protein L19, no bacterial homolog; RPL19A has a paralog, RPL19B, that arose from the whole genome duplication	chrII	414186	415261
2				23	46	41	34
3				3304	2201	2726	4747
4				7	26	25	18
1	YBR084W	MIS1	2928	5121	5811	307	1538	Mitochondrial C1-tetrahydrofolate synthase; involved in interconversion between different oxidation states of tetrahydrofolate (THF); provides activities of formyl-THF synthetase, methenyl-THF cyclohydrolase, and methylene-THF dehydrogenase	chrII	411054	413981
2				25	96	20	42
1	YBR085C-A		258	248	981	2351	315	Protein of unknown function; green fluorescent protein (GFP)-fusion protein localizes to the cytoplasm and to the nucleus; protein abundance increases in response to DNA replication stress	chrII	418907	419164
2				5	20	17	9
1	YBR085W	AAC3	924	1239	634	760	273	Mitochondrial inner membrane ADP/ATP translocator; exchanges cytosolic ADP for mitochondrially synthesized ATP; expressed under anaerobic conditions; similar to Aac1p; has roles in maintenance of viability and in respiration; AAC3 has a paralog, PET9, that arose from the whole genome duplication	chrII	415983	416906
2				9	23	20	10
1	YBR086C	IST2	2841	68	1562	3417	1017	Cortical ER protein involved in ER-plasma membrane tethering; one of 6 proteins (Ist2p, Scs2p, Scs22p, Tcb1p, Tcb2p, Tcb3p) that connect ER to the plasma membrane (PM) and regulate PM phosphatidylinositol-4-phosphate (PI4P) levels by controlling access of Sac1p phosphatase to its substrate PI4P in the PM; localizes to the mother cell in small-budded cells and to the bud in medium- and large-budde…	chrII	420201	423041
2				5	74	87	43
1	YBR087W	RFC5	1065	0	17	87	41	Subunit of heteropentameric Replication factor C (RF-C); RF-C is a DNA binding protein and ATPase that acts as a clamp loader of the proliferating cell nuclear antigen (PCNA) processivity factor for DNA polymerases delta and epsilon	chrII	423765	424829
2				0	2	3	3
1	YBR088C	POL30	777	0	1	0	0	Proliferating cell nuclear antigen (PCNA); functions as the sliding replication clamp for DNA polymerase delta; may function as a docking site for other proteins required for mitotic and meiotic chromosomal DNA replication and for DNA repair; PCNA ubiquitination at K164 plays a crucial role during Okazaki fragment processing	chrII	424990	425766
2				0	1	0	0
1	YBR089C-A	NHP6B	300	340	999	982	644	High-mobility group (HMG) protein; binds to and remodels nucleosomes; involved in recruiting FACT and other chromatin remodelling complexes to the chromosomes; functionally redundant with Nhp6Ap; required for transcriptional initiation fidelity of some tRNA genes; homologous to mammalian HMGB1 and HMGB2; NHP6B has a paralog, NHP6A, that arose from the whole genome duplication	chrII	426190	426489
2				7	21	14	11
1	YBR089W		600	0	1	0	0	Dubious open reading frame; unlikely to encode a functional protein, based on available experimental and comparative sequence data; almost completely overlaps the verified gene POL30	chrII	425183	425782
2				0	1	0	0
1	YBR090C		726	27428	25773	37173	25262	Putative protein of unknown function; green fluorescent protein (GFP)-fusion protein localizes to the cytoplasm and nucleus	chrII	426333	427058
2				50	94	85	65
3				12682	19773	27749	15871
4				31	69	61	48
1	YBR091C	TIM12	330	10	296	633	150	Essential protein of the inner mitochondrial membrane; peripherally localized; component of the TIM22 complex, which is a twin-pore translocase that mediates insertion of numerous multispanning inner membrane proteins	chrII	427155	427484
2				2	4	3	2
1	YBR092C	PHO3	1404	11468	16888	15208	17503	Constitutively expressed acid phosphatase similar to Pho5p; brought to the cell surface by transport vesicles; hydrolyzes thiamin phosphates in the periplasmic space, increasing cellular thiamin uptake; expression is repressed by thiamin	chrII	427698	429101
2				43	114	95	83
1	YBR093C	PHO5	1404	19655	12986	12164	9922	Repressible acid phosphatase; 1 of 3 repressible acid phosphatases that also mediates extracellular nucleotide-derived phosphate hydrolysis; secretory pathway derived cell surface glycoprotein; induced by phosphate starvation and coordinately regulated by PHO4 and PHO2	chrII	429548	430951
2				53	123	107	62
1	YBR094W	PBY1	2262	3752	6879	2442	5209	Putative tubulin tyrosine ligase associated with P-bodies; may have a role in mRNA metabolism; yeast knockout collection strain identified as a pby1 null mutant is actually wild-type for PBY1 and deleted for mms4	chrII	432036	434297
2				23	74	71	46
1	YBR095C	RXT2	1293	142	700	429	129	Component of the histone deacetylase Rpd3L complex; possibly involved in cell fusion and invasive growth; relocalizes to the cytosol in response to hypoxia	chrII	434406	435698
2				2	8	6	6
1	YBR096W		693	332	1783	1047	647	Putative protein of unknown function; green fluorescent protein (GFP)-fusion protein localizes to the ER	chrII	436021	436713
2				3	29	22	12
1	YBR097W	VPS15	4365	89	612	1324	144	Serine/threonine protein kinase involved in vacuolar protein sorting; functions as a membrane-associated complex with Vps34p; active form recruits Vps34p to the Golgi membrane; interacts with the GDP-bound form of Gpa1p; myristoylated; a fraction is localized, with Vps34p, to nuclear pores at nucleus-vacuole junctions and may facilitate transcription elongation for genes positioned at the nuclear…	chrII	436951	441315
2				4	18	17	10
1	YBR098W	MMS4	2076	1215	2596	2313	1082	Subunit of structure-specific Mms4p-Mus81p endonuclease; cleaves branched DNA; involved in recombination, DNA repair, and joint molecule formation/resolution during meiotic recombination; phosphorylation of the non-catalytic subunit Mms4p by Cdc28p and Cdc5p during mitotic cell cycle activates the function of Mms4p-Mus81p	chrII	441515	443590
2				15	61	47	24
1	YBR099C		384	75	327	596	375	Dubious open reading frame; unlikely to encode a functional protein, based on available experimental and comparative sequence data; completely overlaps the verified gene MMS4	chrII	442924	443307
2				3	10	13	4
1	YBR101C	FES1	873	0	344	581	223	Hsp70 (Ssa1p) nucleotide exchange factor; required for the release of misfolded proteins from the Hsp70 system to the Ub-proteasome machinery for destruction; cytosolic homolog of Sil1p, which is the nucleotide exchange factor for BiP (Kar2p) in the endoplasmic reticulum; protein abundance increases in response to DNA replication stress	chrII	443821	444693
2				0	22	17	8
1	YBR102C	EXO84	2262	0	1	5	9	Exocyst subunit with dual roles in exocytosis and spliceosome assembly; subunit of the the exocyst complex which mediates polarized targeting and tethering of post-Golgi secretory vesicles to active sites of exocytosis at the plasma membrane (PM) prior to SNARE-mediated fusion; required for exocyst assembly and targeting the complex to specific sites on the bud tip PM; associates the U1 snRNP; ro…	chrII	445062	447323
2				0	1	2	1
1	YBR103C-A		144	5160	4175	4341	1871	Dubious open reading frame; unlikely to encode a functional protein, based on available experimental and comparative sequence data; identified by homology to related yeast	chrII	449320	449463
2				15	39	41	22
1	YBR103W	SIF2	1608	6331	5114	11458	110438	WD40 repeat-containing subunit of Set3C histone deacetylase complex; complex represses early/middle sporulation genes; antagonizes telomeric silencing; binds specifically to the Sir4p N-terminus	chrII	447709	449316
2				28	87	65	52
1	YBR104W	YMC2	990	51125	10340	16715	2753	Putative mitochondrial inner membrane transporter; proposed role in oleate metabolism and glutamate biosynthesis; member of the mitochondrial carrier (MCF) family; YMC2 has a paralog, YMC1, that arose from the whole genome duplication	chrII	449667	450656
2				40	73	83	41
1	YBR105C	VID24	1089	853	3002	1539	670	GID Complex regulatory subunit; binds GID Complex in response to glucose through interactions with complex member Vid28p; regulates fructose-1,6-bisphosphatase (FBPase) targeting to the vacuole; promotes proteasome-dependent catabolite degradation of FBPase; peripheral membrane protein located at Vid (vacuole import and degradation) vesicles	chrII	450881	451969
2				19	58	67	20
1	YBR106W	PHO88	567	2244	1406	6185	4145	Protein involved in SRP-independent targeting of substrates to the ER; component of an alternative ER targeting pathway that has partial functional redundancy with the GET pathway; preference for substrates with downstream transmembrane domains; interacts with Snd1p, Env10p/Snd2p, and Sec61p-translocon subunits; can compensate for loss of SRP; role in phosphate transport, interacting with pho88, …	chrII	452658	453224
2				21	36	44	29
1	YBR107C	IML3	738	4972	5662	6730	4191	Outer kinetochore protein and component of the Ctf19 complex; involved in the establishment of pericentromeric cohesion during mitosis; prevents non-disjunction of sister chromatids during meiosis II; forms a stable complex with Chl4p; required for localization of Sgo1p to pericentric sites during meiosis I; orthologous to human centromere constitutive-associated network (CCAN) subunit CENP-L and…	chrII	453793	454530
2				18	38	42	24
1	YBR108W	AIM3	2844	9272	7449	9628	4096	Protein that inhibits barbed-end actin filament elongation; interacts with Rvs167p; null mutant is viable and displays elevated frequency of mitochondrial genome loss	chrII	454822	457665
2				50	128	107	48
1	YBR109C	CMD1	444	0	0	0	0	Calmodulin; Ca2+ binding protein that regulates Ca2+ independent processes (mitosis, bud growth, actin organization, endocytosis, etc.) and Ca2+ dependent processes (stress-activated pathways), targets include Nuf1p, Myo2p and calcineurin; binds to the Hog1p MAPK in response to hyperosmotic stress; potentiates membrane tubulation and constriction mediated by the Rvs161p-Rvs167p complex; human CAL…	chrII	457919	458362
2				0	0	0	0
1	YBR109W-A		225	158	316	152	56	Putative protein of unknown function; questionable ORF from MIPS	chrII	458608	458832
2				2	7	7	3
1	YBR110W	ALG1	1350	0	0	252	0	Mannosyltransferase; involved in asparagine-linked glycosylation in the endoplasmic reticulum (ER); essential for viability; human homolog ALG1 complements yeast null mutant	chrII	458872	460221
2				0	0	2	0
1	YBR111C	YSA1	696	2200	4081	5274	4274	Nudix hydrolase family member with ADP-ribose pyrophosphatase activity; shown to metabolize O-acetyl-ADP-ribose to AMP and acetylated ribose 5'-phosphate	chrII	461178	461873
2				10	39	38	16
1	YBR111W-A	SUS1	441	0	1	0	4	Component of both the SAGA histone acetylase and TREX-2 complexes; interacts with RNA polymerase II; involved in mRNA export coupled transcription activation and elongation; involved in post-transcriptional tethering of active genes to the nuclear periphery and to non-nascent mRNP	chrII	462139	462579
2				0	1	0	1
3				0	1	0	0
4				0	1	0	0
1	YBR112C	CYC8	2901	11571	2972	2617	9879	General transcriptional co-repressor; acts together with Tup1p; also acts as part of a transcriptional co-activator complex that recruits the SWI/SNF and SAGA complexes to promoters; can form the prion [OCT+]	chrII	462870	465770
2				14	54	43	41
1	YBR113W		483	0	64	0	557	Dubious open reading frame; unlikely to encode a functional protein, based on available experimental and comparative sequence data; partially overlaps the verified gene CYC8	chrII	465566	466048
2				0	5	0	8
1	YBR114W	RAD16	2373	3198	6363	7876	1922	Nucleotide excision repair (NER) protein; binds damaged DNA during NER; binds DNA in an ATP-dependent manner (with Rad7p) during NER; required for NER of non-transcribed chromatin; subunit of Nucleotide Excision Repair Factor 4 (NEF4) and the Elongin-Cullin-Socs (ECS) ligase complex	chrII	467248	469620
2				22	105	120	42
1	YBR115C	LYS2	4179	1706	4126	10439	5487	Alpha aminoadipate reductase; catalyzes the reduction of alpha-aminoadipate to alpha-aminoadipate 6-semialdehyde, which is the fifth step in biosynthesis of lysine; activation requires posttranslational phosphopantetheinylation by Lys5p	chrII	469748	473926
2				31	130	171	65
1	YBR116C		528	6557	5101	6932	5492	Dubious open reading frame; unlikely to encode a functional protein, based on available experimental and comparative sequence data; partially overlaps the verified gene TKL2	chrII	474199	474726
2				26	41	48	27
1	YBR117C	TKL2	2046	10463	17116	11506	7114	Transketolase; catalyzes conversion of xylulose-5-phosphate and ribose-5-phosphate to sedoheptulose-7-phosphate and glyceraldehyde-3-phosphate in the pentose phosphate pathway; needed for synthesis of aromatic amino acids; TKL2 has a paralog, TKL1, that arose from the whole genome duplication	chrII	474392	476437
2				50	168	108	59
1	YBR118W	TEF2	1377	14978	44771	47198	13881	Translational elongation factor EF-1 alpha; in the GTP-bound active form, binds to and delivers aminoacylated tRNA to the A-site of ribosomes for elongation of nascent polypeptides; associates with vacuolar Rho1p GTPase; TEF2-RFP levels increase during replicative aging; may also have a role in tRNA re-export from the nucleus; TEF2 has a paralog, TEF1, that arose from the whole genome duplication	chrII	477671	479047
2				123	345	198	148
1	YBR119W	MUD1	986	299	590	671	156	U1 snRNP A protein; homolog of human U1-A; involved in nuclear mRNA splicing	chrII	479338	480323
2				4	22	19	6
3				40	137	146	598
4				3	6	3	2
1	YBR120C	CBP6	489	402	0	2	71	Mitochondrial protein required for translation of the COB mRNA; forms a complex with Cbp3p that binds to mt ribosomes near the polypeptide tunnel exit and promotes efficient translation of the COB mRNA; Cbp3p-Cbp6p complex also interacts with newly synthesized cytochrome b (Cobp) and Cbp4p to promote assembly of Cobp into the cytochrome bc1 complex; Cbp3p-Cbp6p complex is sequestered if assembly …	chrII	480435	480923
2				3	0	1	3
1	YBR121C	GRS1	2004	13	48	279	4	Cytoplasmic and mitochondrial glycyl-tRNA synthase; ligates glycine to the cognate anticodon-bearing tRNA; transcription termination factor that may interact with the 3'-end of pre-mRNA to promote 3'-end formation; GRS1 has a paralog, GRS2, that arose from the whole genome duplication; human homolog GARS implicated in Charcot-Marie-Tooth disease, can complement yeast null mutant	chrII	481364	483367
2				2	2	4	1
1	YBR121C-A		159	0	0	0	0	Dubious open reading frame; unlikely to encode a functional protein, based on available experimental and comparative sequence data; completely contained within the verified gene GRS1; identified by expression profiling and mass spectrometry	chrII	482326	482484
2				0	0	0	0
1	YBR122C	MRPL36	534	230	295	109	32	Mitochondrial ribosomal protein of the large subunit; overproduction suppresses mutations in the COX2 leader peptide-encoding region	chrII	483970	484503
2				4	9	3	4
1	YBR123C	TFC1	1950	0	39	64	14	Subunit of RNA polymerase III transcription initiation factor complex; one of six subunits of the RNA polymerase III transcription initiation factor complex (TFIIIC); part of the TauA globular domain of TFIIIC that binds DNA at the BoxA promoter sites of tRNA and similar genes; human homolog is TFIIIC-63	chrII	484742	486691
2				0	3	11	2
1	YBR124W		360	339	823	203	201	Putative protein of unknown function	chrII	486507	486866
2				4	8	5	3
1	YBR125C	PTC4	1182	877	2344	889	517	Cytoplasmic type 2C protein phosphatase (PP2C); identified as a high-copy number suppressor of cnb1 mpk1 synthetic lethality; overexpression decreases high-osmolarity induced Hog1p phosphorylation and kinase activity	chrII	487199	488380
2				10	36	28	16
1	YBR126C	TPS1	1488	102	310	248	9	Synthase subunit of trehalose-6-P synthase/phosphatase complex; synthesizes the storage carbohydrate trehalose, which is critically important for survival of long-term desiccation; also found in a monomeric form; expression is induced by the stress response and repressed by the Ras-cAMP pathway; protein abundance increases in response to DNA replication stress and in response to prolonged exposur…	chrII	488905	490392
2				1	11	10	3
1	YBR126W-A	MEO1	207	5996	11175	11932	6800	Putative protein of unknown function; identified by gene-trapping, microarray analysis, and genome-wide homology searches; mRNA identified as translated by ribosome profiling data; SWAT-GFP, seamless-GFP and mCherry fusion proteins localize to the endoplasmic reticulum; partially overlaps the dubious ORF YBR126W-B	chrII	490850	491056
2				14	27	25	17
1	YBR126W-B		144	6672	11663	12338	7988	Dubious open reading frame; unlikely to encode a functional protein, based on available experimental and comparative sequence data; partially overlaps the dubious ORF YBR126W-A; identified by SAGE	chrII	490927	491070
2				13	14	23	17
1	YBR127C	VMA2	1554	265	422	815	154	Subunit B of V1 peripheral membrane domain of vacuolar H+-ATPase; electrogenic proton pump found throughout the endomembrane system; contains nucleotide binding sites; also detected in the cytoplasm; protein abundance increases in response to DNA replication stress; human homolog ATP6V1B1, implicated in autosomal-recessive distal renal tubular acidosis (RTA) with sensorineural deafness, complemen…	chrII	491269	492822
2				3	6	8	2
1	YBR128C	ATG14	1035	5308	2041	8063	1034	Autophagy-specific subunit of phosphatidylinositol 3-kinase complex I; Atg14p targets complex I to the phagophore assembly site (PAS); required for localizing additional ATG proteins to the PAS; required for overflow degradation of misfolded proteins when ERAD is saturated; homolog of human Barkor; other members are Vps34, Vps15, and Vps30p	chrII	493081	494115
2				29	56	55	31
1	YBR129C	OPY1	987	184	998	2284	1004	Protein of unknown function; overproduction blocks cell cycle arrest in the presence of mating pheromone; the authentic, non-tagged protein is detected in highly purified mitochondria in high-throughput studies	chrII	494353	495339
2				3	22	24	12
1	YBR130C	SHE3	1278	8391	2712	12025	1030	Protein adaptor between Myo4p and the She2p-mRNA complex; part of the mRNA localization machinery that restricts accumulation of certain proteins to the bud; also required for cortical ER inheritance	chrII	495592	496869
2				14	35	30	22
1	YBR131C-A		90	0	0	0	0	Dubious open reading frame; unlikely to encode a functional protein, based on available experimental and comparative sequence data; partially overlaps the verified ORF YBR131W; identified by gene-trapping, microarray analysis, and genome-wide homology searches	chrII	497650	497739
2				0	0	0	0
1	YBR131W	CCZ1	2115	177	71	355	110	Subunit of a heterodimeric guanine nucleotide exchange factor (GEF); subunit of the Mon1-Ccz1 GEF complex, which stimulates nucleotide exchange and activation of Ypt7p, a Rab family GTPase involved in membrane tethering and fusion events at the late endosome and vacuole; GEF activity is stimulated by membrane association and anionic phospholipids; involved in localizing Ypt7p to the vacuolar memb…	chrII	497163	499277
2				2	5	15	9
1	YBR132C	AGP2	1791	11976	20266	17432	7950	Plasma membrane regulator of polyamine and carnitine transport; has similarity to transporters but lacks transport activity; may act as a sensor that transduces environmental signals; has a positive or negative regulatory effect on transcription of many transporter genes	chrII	499652	501442
2				28	82	69	38
1	YBR133C	HSL7	2484	23	329	421	24	Protein arginine N-methyltransferase; exhibits septin and Hsl1p-dependent localization to the bud neck in budded cells and periodic Hsl1p-dependent phosphorylation; required with Hsl1p, and Elm1p for the mother-bud neck recruitment, phosphorylation, and degradation of Swe1p; interacts directly with Swe1p; relocalizes away from bud neck upon DNA replication stress; human homolog PRMT5 can compleme…	chrII	501804	504287
2				1	14	22	7
1	YBR134W		402	0	48	57	32	Dubious open reading frame; unlikely to encode a functional protein, based on available experimental and comparative sequence data	chrII	504243	504644
2				0	7	4	2
1	YBR135W	CKS1	453	0	14	2	0	Cyclin-dependent protein kinase regulatory subunit and adaptor; interacts with Cdc28p (aka Cdk1p); required for G1/S and G2/M phase transitions and budding; mediates phosphorylation and degradation of Sic1p; modulates proteolysis of M-phase targets through interactions with the proteasome; role in transcriptional regulation, recruiting proteasomal subunits to target gene promoters; human homologs…	chrII	504854	505306
2				0	1	1	0
1	YBR136W	MEC1	7107	94	148	438	350	Genome integrity checkpoint protein and PI kinase superfamily member; Mec1p and Dun1p function in same pathway to regulate dNTP pools and telomere length; signal transducer required for cell cycle arrest and transcriptional responses to damaged or unreplicated DNA; facilitates replication fork progression and regulates P-body formation under replication stress; promotes interhomolog recombination…	chrII	505668	512774
2				3	9	13	4
1	YBR137W		540	1756	1961	1715	1257	Protein with a role in ER delivery of tail-anchored membrane proteins; interacts with Sgt2p; binds to the TRC complex, which inserts proteins into the ER membrane; interacts with Msn5p karyopherin; YBR137W is not an essential gene	chrII	513044	513583
2				14	30	29	19
1	YBR138C		1575	5379	1771	5465	1002	Cytoplasmic protein of unknown function; APCC(Cdh1) substrate; potentially phosphorylated by Cdc28p; YBR138C is not an essential gene	chrII	513762	515336
2				14	40	56	23
1	YBR139W		1527	4629	4633	4885	5431	Putative serine type carboxypeptidase; role in phytochelatin synthesis; green fluorescent protein (GFP)-fusion protein localizes to the vacuole; expression induced by nitrogen limitation in a GLN3, GAT1-independent manner	chrII	515664	517190
2				23	67	61	48
1	YBR140C	IRA1	9279	13	185	316	1299	GTPase-activating protein; negatively regulates RAS by converting it from GTP- to the GDP-bound inactive form, required for reducing cAMP levels under nutrient limiting conditions, mediates membrane association of adenylate cyclase; mutations cause catalase T deficiency, defective glycogen synthesis and defective trehalose accumulation; IRA1 has a paralog, IRA2, that arose from the whole genome d…	chrII	517350	526628
2				3	22	18	30
1	YBR141C	BMT2	1014	1993	2773	4946	2432	Nucleolar S-adenosylmethionine-dependent rRNA methyltransferase; methylates adenine (m1A) of the large subunit (LSU) rRNA at position 2142; belongs to Rossmann fold superfamily; green fluorescent protein (GFP)-fusion protein localizes to the nucleolus; YBR141C is not an essential gene	chrII	527025	528038
2				16	46	41	30
1	YBR141W-A		96	89	307	385	391	Dubious open reading frame; unlikely to encode a functional protein, based on available experimental and comparative sequence data; overlaps the uncharacterized ORF YBR141C; identified by gene-trapping, microarray analysis, and genome-wide homology searching	chrII	527167	527262
2				1	5	1	3
1	YBR142W	MAK5	2322	0	20	4	0	Essential nucleolar protein; putative DEAD-box RNA helicase required for maintenance of M1 dsRNA virus; involved in biogenesis of large (60S) ribosomal subunits	chrII	528317	530638
2				0	2	4	0
1	YBR143C	SUP45	1314	0	14	59	5	Polypeptide release factor (eRF1) in translation termination; mutant form acts as a recessive omnipotent suppressor; methylated by Mtq2p-Trm112p in ternary complex eRF1-eRF3-GTP; mutation of methylation site confers resistance to zymocin; has a role in cytokinesis through interaction with Mlc1p	chrII	530869	532182
2				0	3	1	2
1	YBR144C		315	26295	14379	12092	2759	Putative protein of unknown function; conserved across S. cerevisiae strains; YBR144C is not an essential gene	chrII	533235	533549
2				37	71	81	27
1	YBR145W	ADH5	1056	4623	4942	7451	2235	Alcohol dehydrogenase isoenzyme V; involved in ethanol production; ADH5 has a paralog, ADH1, that arose from the whole genome duplication	chrII	533762	534817
2				29	67	75	34
1	YBR146W	MRPS9	837	235	29	13	39	Mitochondrial ribosomal protein of the small subunit	chrII	535260	536096
2				2	3	3	4
1	YBR147W	RTC2	891	2548	1691	3155	848	Putative vacuolar membrane transporter for cationic amino acids; likely contributes to amino acid homeostasis by exporting cationic amino acids from the vacuole; positive regulation by Lys14p suggests that lysine may be the primary substrate; member of the PQ-loop family, with seven transmembrane domains; similar to mammalian PQLC2 vacuolar transporter; RTC2 has a paralog, YPQ1, that arose from t…	chrII	536575	537465
2				15	31	45	12
1	YBR148W	YSW1	1830	3071	4489	5311	1640	Protein required for normal prospore membrane formation; interacts with Gip1p, which is the meiosis-specific regulatory subunit of the Glc7p protein phosphatase; expressed specifically in spores and localizes to the prospore membrane; YSW1 has a paralog, SPO21, that arose from the whole genome duplication	chrII	537876	539705
2				16	62	46	29
1	YBR149W	ARA1	1035	2232	4661	3205	2463	NADP+ dependent arabinose dehydrogenase; involved in carbohydrate metabolism; purified as homodimer; naturally occurs with a N-terminus degradation product	chrII	539987	541021
2				22	57	46	28
1	YBR150C	TBS1	3285	21463	9594	6185	3598	Protein of unknown function; the authentic, non-tagged protein is detected in highly purified mitochondria in high-throughput studies; TBS1 has a paralog, HAL9, that arose from the whole genome duplication	chrII	541209	544493
2				46	129	107	60
1	YBR151W	APD1	951	30757	2978	3788	3423	Protein of unknown function; required for normal localization of actin patches and for normal tolerance of sodium ions and hydrogen peroxide; localizes to both cytoplasm and nucleus	chrII	545028	545978
2				31	49	48	30
1	YBR152W	SPP381	876	2306	1526	1777	510	mRNA splicing factor, component of U4/U6.U5 tri-snRNP; interacts genetically and physically with Prp38p; relocalizes to the cytosol in response to hypoxia	chrII	546376	547251
2				10	20	27	5
1	YBR153W	RIB7	735	0	3	103	8	Diaminohydroxyphoshoribosylaminopyrimidine deaminase; catalyzes the second step of the riboflavin biosynthesis pathway	chrII	547460	548194
2				0	2	5	1
1	YBR154C	RPB5	648	50	3	3	13	RNA polymerase subunit ABC27; common to RNA polymerases I, II, and III; contacts DNA and affects transactivation	chrII	548362	549009
2				1	2	1	1
1	YBR155W	CNS1	1158	0	107	136	21	TPR-containing co-chaperone; binds both Hsp82p (Hsp90) and Ssa1p (Hsp70); stimulates ATPase activity of Ssa1p; ts mutants reduce Hsp82p function, overexpression suppresses phenotypes of HSP82 ts allele and cpr7 deletion; human homolog TTC4 complements yeast cns1 mutant	chrII	549771	550928
2				0	3	2	2
1	YBR156C	SLI15	2097	0	146	411	32	Subunit of the conserved chromosomal passenger complex (CPC); complex regulates kinetochore-microtubule attachments, activation of the spindle tension checkpoint, and mitotic spindle disassembly; other complex members are Ipl1p, Bir1p, and Nbl1p	chrII	551104	553200
2				0	2	4	2
1	YBR157C	ICS2	768	2839	7457	5877	3630	Protein of unknown function; null mutation does not confer any obvious defects in growth, spore germination, viability, or carbohydrate utilization	chrII	553543	554310
2				13	47	50	31
1	YBR158W	AMN1	1650	13653	14592	13394	9426	Protein required for daughter cell separation; multiple mitotic checkpoints, and chromosome stability; contains 12 degenerate leucine-rich repeat motifs; expression is induced by the Mitotic Exit Network (MEN)	chrII	556549	558198
2				25	76	58	44
1	YBR159W	IFA38	1044	10	8	3	0	Microsomal beta-keto-reductase; contains oleate response element (ORE) sequence in the promoter region; mutants exhibit reduced VLCFA synthesis, accumulate high levels of dihydrosphingosine, phytosphingosine and medium-chain ceramides	chrII	558685	559728
2				1	2	2	0
1	YBR160W	CDC28	897	0	0	13	7	Cyclin-dependent kinase (CDK) catalytic subunit; master regulator of mitotic and meiotic cell cycles; alternately associates with G1, S, G2/M phase cyclins, which provide substrate specificity; regulates metabolism, basal transcription, chromosome dynamics, growth and morphogenesis; transcript induction in osmostress involves antisense RNA; human homologs CDK1, CDK2, CDK3 can complement yeast con…	chrII	560078	560974
2				0	0	3	1
1	YBR161W	CSH1	1131	7795	5340	3800	2458	Mannosylinositol phosphorylceramide (MIPC) synthase catalytic subunit; forms a complex with regulatory subunit Csg2p; function in sphingolipid biosynthesis is overlapping with that of Sur1p; CSH1 has a paralog, SUR1, that arose from the whole genome duplication	chrII	561634	562764
2				21	82	55	34
1	YBR162C	TOS1	1368	38944	15753	12198	6560	Covalently-bound cell wall protein of unknown function; identified as a cell cycle regulated SBF target gene; deletion mutants are highly resistant to treatment with beta-1,3-glucanase; has sequence similarity to YJL171C	chrII	563203	564570
2				38	92	76	61
1	YBR162W-A	YSY6	198	246	1371	1577	295	Protein of unknown function; expression suppresses a secretory pathway mutation in E. coli; has similarity to the mammalian RAMP4 protein involved in secretion	chrII	565231	565428
2				4	18	12	3
1	YBR163W	EXO5	1758	4765	164	39	469	Mitochondrial 5'-3' exonuclease and sliding exonuclease; required for mitochondrial genome maintenance; distantly related to the RecB nuclease domain of bacterial RecBCD recombinases; may be regulated by the transcription factor Ace2	chrII	565723	567480
2				40	22	7	24
1	YBR164C	ARL1	552	0	24	9	0	Soluble GTPase with a role in regulation of membrane traffic; regulates potassium influx; role in membrane organization at trans-Golgi network; required for delivery of Atg9p to the phagophore assembly site during autophagy under high temperature stress; required with Ypt6p for starvation-induced autophagy; required for the CVT pathway under non-starvation conditions; G protein of the Ras superfa…	chrII	567875	568426
2				0	6	1	0
1	YBR165W	UBS1	834	2785	2012	2613	2096	Ubiquitin-conjugating enzyme suppressor that regulates Cdc34p; functions as a general positive regulator of Cdc34p activity; nuclear protein that may represent a link between nucleocytoplasmic transport and ubiquitin ligase activity	chrII	568852	569685
2				9	33	35	13
1	YBR166C	TYR1	1359	7	231	268	69	Prephenate dehydrogenase involved in tyrosine biosynthesis; expression is dependent on phenylalanine levels	chrII	569842	571200
2				1	7	7	3
1	YBR167C	POP7	423	0	3	44	0	Subunit of RNase MRP, nuclear RNase P and telomerase; forms a soluble heterodimer with Pop6p that binds P3 domain of RNase MRP and RNase P RNAs; RNase MRP cleaves pre-rRNA, nuclear RNase P cleaves tRNA precursors to generate mature 5' ends and facilitates turnover of nuclear RNAs, while telomerase replenishes telomeric DNA	chrII	571468	571890
2				0	2	2	0
1	YBR168W	PEX32	1242	1033	833	745	551	Peroxisomal integral membrane protein; involved in negative regulation of peroxisome size; partially functionally redundant with Pex31p; genetic interactions suggest action at a step downstream of steps mediated by Pex28p and Pex29p	chrII	572371	573612
2				7	18	16	7
1	YBR169C	SSE2	2082	6610	15808	16989	4261	Member of Hsp110 subclass of the heat shock protein 70 (HSP70) family; serves as nucleotide exchange factor to load ATP onto the SSA class of cytosolic Hsp70s; may be involved in protein folding; localized to the cytoplasm; SSE2 has a paralog, SSE1, that arose from the whole genome duplication	chrII	573915	575996
2				24	103	94	43
1	YBR170C	NPL4	1743	232	1493	655	62	Substrate-recruiting cofactor of the Cdc48p-Npl4p-Ufd1p segregase; assists Cdc48p in the dislocation of misfolded, polyubiquitinated ERAD substrates that are subsequently delivered to the proteasome for degradation; also involved in the regulated destruction of resident ER membrane proteins, such as HMG-CoA reductase (Hmg1/2p) and cytoplasmic proteins (Fbp1p); role in mobilizing membrane bound tr…	chrII	576344	578086
2				2	18	11	3
1	YBR171W	SEC66	621	0	111	314	197	Non-essential subunit of Sec63 complex; with Sec61 complex, Kar2p/BiP and Lhs1p forms a channel competent for SRP-dependent and post-translational SRP-independent protein targeting and import into the ER; other members are Sec63p, Sec62p, and Sec72p	chrII	578364	578984
2				0	11	5	7
1	YBR172C	SMY2	2223	20990	21209	18337	20076	GYF domain protein; involved in COPII vesicle formation; interacts with the Sec23p/Sec24p subcomplex; overexpression suppresses the temperature sensitivity of a myo2 mutant; similar to S. pombe Mpd2; SMY2 has a paralog, SYH1, that arose from the whole genome duplication	chrII	579150	581372
2				39	124	100	95
1	YBR173C	UMP1	447	828	636	1925	817	Chaperone required for correct maturation of the 20S proteasome; short-lived chaperone; may inhibit premature dimerization of proteasome half-mers; degraded by proteasome upon completion of its assembly	chrII	581726	582172
2				2	11	10	5
1	YBR174C		315	0	40	368	739	Dubious open reading frame; unlikely to encode a functional protein, based on available experimental and comparative sequence data; partially overlaps the verified ORF YBR175W; null mutant is viable and sporulation defective	chrII	582338	582652
2				0	7	19	11
1	YBR175W	SWD3	948	1	24	177	196	Essential subunit of the COMPASS (Set1C) complex; COMPASS methylates histone H3 on lysine 4 and is required in transcriptional silencing near telomeres; WD40 beta propeller superfamily member and ortholog of mammalian WDR5	chrII	582408	583355
2				1	7	26	14
1	YBR176W	ECM31	939	14685	11981	6536	6776	Ketopantoate hydroxymethyltransferase; required for pantothenic acid biosynthesis, converts 2-oxoisovalerate into 2-dehydropantoate	chrII	583720	584658
2				17	64	42	32
1	YBR177C	EHT1	1356	3783	6522	6374	3189	Acyl-coenzymeA:ethanol O-acyltransferase; plays a minor role in medium-chain fatty acid ethyl ester biosynthesis; possesses short-chain esterase activity; localizes to lipid particles and the mitochondrial outer membrane; EHT1 has a paralog, EEB1, that arose from the whole genome duplication	chrII	584807	586162
2				16	61	61	28
1	YBR178W		375	15925	5144	5547	6053	Dubious open reading frame; unlikely to encode a functional protein, based on available experimental and comparative sequence data; partially overlaps the verified gene YBR177C	chrII	586071	586445
2				32	65	67	46
1	YBR179C	FZO1	2568	1659	44	16	129	Mitofusin; integral membrane protein involved in mitochondrial outer membrane tethering and fusion; role in mitochondrial genome maintenance; efficient tethering and degradation of Fzo1p requires an intact N-terminal GTPase domain; targeted for destruction by the ubiquitin ligase SCF-Mdm30p and the cytosolic ubiquitin-proteasome system	chrII	586547	589114
2				12	11	3	14
1	YBR180W	DTR1	1719	3599	4829	3291	2338	Putative dityrosine transporter of the major facilitator superfamily; member of the 12-spanner drug:H(+) antiporter DHA1 family; required for spore wall synthesis; sequence similarity to QDR1 and QDR3, and the triple mutant dtr1 qdr1 qdr3 exhibits reduced dityrosine fluorescence relative to the single mutants; expressed during sporulation	chrII	589741	591459
2				30	61	53	23
1	YBR181C	RPS6B	1063	10	145	37	18	Protein component of the small (40S) ribosomal subunit; homologous to mammalian ribosomal protein S6, no bacterial homolog; phosphorylated on S233 by Ypk3p in a TORC1-dependent manner, and on S232 in a TORC1/2-dependent manner by Ypk1/2/3p; RPS6B has a paralog, RPS6A, that arose from the whole genome duplication	chrII	591712	592774
2				2	12	6	4
3				20	108	256	28
4				1	10	9	2
1	YBR182C	SMP1	1359	1700	5985	3304	1692	MADS-box transcription factor involved in osmotic stress response; SMP1 has a paralog, RLM1, that arose from the whole genome duplication	chrII	593506	594864
2				17	70	46	26
1	YBR182C-A		195	1281	1304	2423	730	Putative protein of unknown function; identified by gene-trapping, microarray-based expression analysis, and genome-wide homology searching	chrII	595361	595555
2				6	19	15	7
1	YBR183W	YPC1	951	1847	4415	6316	2704	Alkaline ceramidase; also has reverse (CoA-independent) ceramide synthase activity; catalyzes both breakdown and synthesis of phytoceramide; overexpression confers fumonisin B1 resistance; YPC1 has a paralog, YDC1, that arose from the whole genome duplication	chrII	596115	597065
2				15	64	55	31
1	YBR184W		1572	1809	3151	4906	4966	Putative protein of unknown function; YBR184W is not an essential gene	chrII	597363	598934
2				22	61	49	26
1	YBR185C	MBA1	837	40	258	39	485	Membrane-associated mitochondrial ribosome receptor; forms a complex with Mdm38p that may facilitate recruitment of mRNA-specific translational activators to ribosomes; possible role in protein export from the matrix to inner membrane	chrII	599123	599959
2				2	13	6	8
1	YBR186W	PCH2	1808	1568	5343	5313	3771	Hexameric ring ATPase that remodels chromosome axis protein Hop1p; nucleolar component of the pachytene checkpoint, which prevents chromosome segregation when recombination and chromosome synapsis are defective; also represses meiotic interhomolog recombination in rDNA; required for meiotic double-stranded break formation	chrII	600553	602360
2				24	76	61	49
3				0	36	20	229
4				0	3	2	3
1	YBR187W	GDT1	843	783	3164	2232	1587	Calcium transporter localized to the cis- and medial-Golgi apparatus; required for protein glycosylation; GFP-fusion protein localizes to the vacuole; TMEM165, a human gene which causes Congenital Disorders of Glycosylation is orthologous and functionally complements the null allele; expression pattern and physical interactions suggest a possible role in ribosome biogenesis; expression reduced in…	chrII	602634	603476
2				6	29	23	23
1	YBR188C	NTC20	423	2154	3233	1980	2119	Member of the NineTeen Complex (NTC); this complex contains Prp19p and stabilizes U6 snRNA in catalytic forms of the spliceosome containing U2, U5, and U6 snRNAs	chrII	603685	604107
2				15	24	25	20
1	YBR189W	RPS9B	1001	1264	789	1188	648	Protein component of the small (40S) ribosomal subunit; homologous to mammalian ribosomal protein S9 and bacterial S4; RPS9B has a paralog, RPS9A, that arose from the whole genome duplication	chrII	604508	605508
2				5	8	11	7
3				0	0	6	0
4				0	0	2	0
1	YBR190W		312	32	7	13	1	Dubious open reading frame; unlikely to encode a functional protein, based on available experimental and comparative sequence data; partially overlaps the verified ribosomal protein gene RPL21A/YBR191W	chrII	605966	606277
2				3	1	4	1
1	YBR191W	RPL21A	871	837	370	188	956	Ribosomal 60S subunit protein L21A; homologous to mammalian ribosomal protein L21, no bacterial homolog; RPL21A has a paralog, RPL21B, that arose from the whole genome duplication	chrII	606270	607140
2				9	11	10	18
3				18	35	0	0
4				2	6	0	0
1	YBR191W-A		75	0	18	0	75	Dubious open reading frame; unlikely to encode a functional protein, based on available experimental and comparative sequence data	chrII	607149	607223
2				0	2	0	2
1	YBR192W	RIM2	1134	241	6	26	19	Mitochondrial pyrimidine nucleotide transporter; imports pyrimidine nucleoside triphosphates and exports pyrimidine nucleoside monophosphates; member of the mitochondrial carrier family	chrII	607652	608785
2				6	3	3	2
1	YBR193C	MED8	672	0	0	0	1	Subunit of the RNA polymerase II mediator complex; associates with core polymerase subunits to form the RNA polymerase II holoenzyme; essential for transcriptional regulation	chrII	609082	609753
2				0	0	0	1
1	YBR194W	AIM4	372	14	541	636	485	Protein proposed to be associated with the nuclear pore complex; null mutant is viable, displays elevated frequency of mitochondrial genome loss and is sensitive to freeze-thaw stress	chrII	610038	610409
2				2	14	11	4
1	YBR195C	MSI1	1269	208	2028	2983	2242	Subunit of chromatin assembly factor I (CAF-1); chromatin assembly by CAF-1 affects multiple processes including silencing at telomeres, mating type loci, and rDNA; maintenance of kinetochore structure; deactivation of DNA damage checkpoint after DNA repair; chromatin dynamics during transcription; and repression of divergent noncoding transcription; Msi1p localizes to nucleus and cytoplasm and i…	chrII	610614	611882
2				7	61	41	23
1	YBR196C	PGI1	1665	16	31	1	0	Glycolytic enzyme phosphoglucose isomerase; catalyzes the interconversion of glucose-6-phosphate and fructose-6-phosphate; required for cell cycle progression and completion of the gluconeogenic events of sporulation	chrII	612236	613900
2				1	3	1	0
1	YBR196C-A		150	0	11	0	2	Putative protein of unknown function; identified by fungal homology and RT-PCR	chrII	614024	614173
2				0	4	0	1
1	YBR196C-B		105	2253	3416	3772	1454	Putative protein of unknown function; identified by expression profiling and mass spectrometry	chrII	614526	614630
2				7	30	18	7
1	YBR197C		654	5103	14638	12013	8653	Protein of unknown function; green fluorescent protein (GFP)-fusion protein localizes to the cytoplasm and nucleus; YBR197C is not an essential gene; relative distribution to the nucleus increases upon DNA replication stress; YBR197C has a paralog, YPL077C, that arose from the whole genome duplication	chrII	615203	615856
2				37	92	71	58
1	YBR198C	TAF5	2397	2	0	52	65	Subunit (90 kDa) of TFIID and SAGA complexes; involved in RNA polymerase II transcription initiation and in chromatin modification	chrII	616127	618523
2				1	0	7	1
1	YBR199W	KTR4	1395	26273	9523	6601	2548	Glycosyltransferase involved in protein glycosylation; transfers GDP-mannose to methyl-alpha-mannoside in vitro; member of the KRE2/MNT1 mannosyltransferase family of type II membrane proteins with a short cytoplasmic N-terminus, a membrane-spanning region and a highly conserved catalytic lumenal domain	chrII	618909	620303
2				24	67	52	31
1	YBR200W	BEM1	1656	0	3	303	5	Protein containing SH3-domains; involved in establishing cell polarity and morphogenesis; functions as a scaffold protein for complexes that include Cdc24p, Ste5p, Ste20p, and Rsr1p	chrII	620872	622527
2				0	3	3	1
1	YBR200W-A		165	263	287	20	833	Putative protein of unknown function; identified by fungal homology and RT-PCR	chrII	622983	623147
2				6	7	2	3
1	YBR201C-A		204	245	168	263	143	Putative protein of unknown function	chrII	624493	624696
2				3	13	13	6
1	YBR201W	DER1	636	1130	1321	3674	2100	ER membrane protein that promotes export of misfolded polypeptides; required for ER-associated protein degradation of misfolded or unassembled proteins; initiates export of aberrant polypeptides from ER lumen by threading them into ER membrane and routing them to Hrd1p for ubiquitination; function normally requires N-terminal acetylation by NatB; N- and C- termini protrude into cytoplasm; similar…	chrII	623576	624211
2				5	27	31	10
1	YBR202W	MCM7	2538	859	892	768	664	Component of the Mcm2-7 hexameric helicase complex; MCM2-7 primes origins of DNA replication in G1 and becomes an active ATP-dependent helicase that promotes DNA melting and elongation in S-phase; forms an Mcm4p-6p-7p subcomplex	chrII	625772	628309
2				13	25	20	13
1	YBR203W	COS111	2775	7442	9847	10127	3082	Protein required for antifungal drug ciclopirox olamine resistance; not related to the subtelomerically-encoded COS family; the authentic, non-tagged protein is detected in highly purified mitochondria in high-throughput studies	chrII	629168	631942
2				34	102	91	52
1	YBR204C	LDH1	1128	691	3397	1024	139	Serine hydrolase; exhibits active esterase plus weak triacylglycerol lipase activities; proposed role in lipid homeostasis, regulating phospholipid and non-polar lipid levels and required for mobilization of LD-stored lipids; localizes to the lipid droplet (LD) surface; contains a classical serine containing catalytic triad (GxSxG motif)	chrII	632254	633381
2				7	34	30	8
1	YBR205W	KTR3	1215	1763	5310	3967	533	Putative alpha-1,2-mannosyltransferase; involved in O- and N-linked protein glycosylation; member of the KRE2/MNT1 mannosyltransferase family; Svp26p mediates uptake of Ktr3p into COPII vesicles; relocalizes from nucleus to vacuole upon DNA replication stress	chrII	633622	634836
2				16	71	60	20
1	YBR206W		324	2030	3836	2177	588	Dubious open reading frame; unlikely to encode a functional protein, based on available experimental and comparative sequence data; partially overlaps the verified gene KTR3	chrII	634601	634924
2				7	37	28	13
1	YBR207W	FTH1	1398	6158	5811	7184	2640	Putative high affinity iron transporter; involved in transport of intravacuolar stores of iron; forms complex with Fet5p; expression is regulated by iron; proposed to play indirect role in endocytosis; protein abundance increases in response to DNA replication stress	chrII	635146	636543
2				16	57	52	32
1	YBR208C	DUR1,2	5508	33225	22019	39218	31607	Urea amidolyase; contains both urea carboxylase and allophanate hydrolase activities, degrades urea to CO2 and NH3; expression sensitive to nitrogen catabolite repression and induced by allophanate, an intermediate in allantoin degradation; protein abundance increases in response to DNA replication stress	chrII	636703	642210
2				116	247	261	190
1	YBR209W		318	4719	4211	13424	14066	Putative protein of unknown function; conserved across S. cerevisiae strains; YBR209W is not an essential gene	chrII	642583	642900
2				39	51	66	60
1	YBR210W	ERV15	429	3479	3050	2611	729	Protein involved in export of proteins from the endoplasmic reticulum; ERV15 has a paralog, ERV14, that arose from the whole genome duplication	chrII	645550	645978
2				11	37	25	12
1	YBR211C	AME1	975	0	262	363	135	Essential kinetochore protein associated with microtubules and SPBs; component of the kinetochore sub-complex COMA (Ctf19p, Okp1p, Mcm21p, Ame1p); involved in spindle checkpoint maintenance; orthologous to human centromere constitutive-associated network (CCAN) subunit CENP-U and fission yeast Mis17; relative distribution to the nucleus increases upon DNA replication stress	chrII	646158	647132
2				0	6	5	3
1	YBR212W	NGR1	2019	508	3294	6009	964	RNA binding protein that negatively regulates growth rate; interacts with the 3' UTR of the mitochondrial porin (POR1) mRNA and enhances its degradation; overexpression impairs mitochondrial function; interacts with Dhh1p to mediate POR1 mRNA decay; expressed in stationary phase	chrII	647886	649904
2				11	58	65	21
1	YBR213W	MET8	825	2418	3666	3713	2519	Bifunctional dehydrogenase and ferrochelatase; involved in the biosynthesis of siroheme, a prosthetic group used by sulfite reductase; required for sulfate assimilation and methionine biosynthesis	chrII	650368	651192
2				10	60	52	27
1	YBR214W	SDS24	1584	780	6956	4613	1717	Protein involved in cell separation during budding; one of two S. cerevisiae homologs (Sds23p and Sds24p) of the S. pombe Sds23 protein, which is implicated in APC/cyclosome regulation; may play an indirect role in fluid-phase endocytosis; protein abundance increases in response to DNA replication stress; SDS24 has a paralog, SDS23, that arose from the whole genome duplication	chrII	651415	652998
2				21	82	75	40
1	YBR215W	HPC2	1962	7	348	262	214	Subunit of the HIR complex; HIR is a nucleosome assembly complex involved in regulation of histone gene transcription; mutants display synthetic defects with subunits of FACT, a complex that allows passage of RNA Pol II through nucleosomes	chrII	653356	655317
2				1	27	19	6
3				0	2	42	20
4				0	1	3	2
1	YBR216C	YBP1	2025	2369	2611	1406	1330	Protein involved in cellular response to oxidative stress; required for oxidation of specific cysteine residues of transcription factor Yap1p, resulting in nuclear localization of Yap1p in response to stress; YBP1 has a paralog, YBP2, that arose from the whole genome duplication	chrII	655576	657600
2				13	53	39	29
1	YBR217W	ATG12	561	391	420	688	517	Ubiquitin-like modifier involved in autophagy and the Cvt pathway; conserved; conjugated to Atg5p to form a complex involved in Atg8p lipidation; Atg5p-Atg12p conjugate enhances E2 activity of Atg3p by rearranging its catalytic site, also forms a complex with Atg16p; the Atg5-Atg12/Atg16 complex binds to membranes and is essential for autophagosome formation	chrII	657832	658392
2				5	15	9	7
1	YBR218C	PYC2	3543	51389	23129	23042	6813	Pyruvate carboxylase isoform; cytoplasmic enzyme that converts pyruvate to oxaloacetate; differentially regulated than isoform Pyc1p; mutations in the human homolog are associated with lactic acidosis; PYC2 has a paralog, PYC1, that arose from the whole genome duplication	chrII	658707	662249
2				94	193	190	93
1	YBR219C		805	19098	4266	3861	4632	Putative protein of unknown function; YBR219C is not an essential gene	chrII	662499	663303
2				17	35	32	19
3				24572	18945	12036	13310
4				33	73	61	49
1	YBR220C		1683	22752	11420	9656	7833	Putative protein of unknown function; YBR220C is not an essential gene	chrII	662995	664677
2				35	105	96	44
1	YBR221C	PDB1	1101	26	47	53	25535	E1 beta subunit of the pyruvate dehydrogenase (PDH) complex; PDH is an evolutionarily conserved multi-protein complex found in mitochondria	chrII	665153	666253
2				2	3	9	8
1	YBR221W-A		105	1597	1609	728	2281	Putative protein of unknown function; identified by expression profiling and mass spectrometry	chrII	666538	666642
2				6	21	11	17
1	YBR222C	PCS60	1632	14291	12184	12074	5467	Oxalyl-CoA synthetase; capable of catalyzing conversion of oxalate to oxalyl-CoA; catalyzes first step in pathway of oxalate degradation that functions to protect yeast from inhibitory effects of oxalate; peroxisomal protein that binds mRNA; localizes to both peroxisomal peripheral membrane and matrix, expression is highly inducible by oleic acid; similar to E. coli long chain acyl-CoA synthetase	chrII	666720	668351
2				35	117	107	47
1	YBR223C	TDP1	1635	4340	8010	8427	4359	Tyrosyl-DNA phosphodiesterase I; hydrolyzes 3' and 5'-phosphotyrosyl bonds; involved in the repair of DNA lesions created by topo I and topo II; mutations in the human homolog, TDP1, result in the a neurodegenerative disease, spinocerebellar ataxia with axonal neuropathy (SCAN1); yeast cells and human rhabdomyosarcoma lines that overexpress TDP1 both exhibit elevated dosage chromosomal instabilit…	chrII	668663	670297
2				35	127	101	45
1	YBR223W-A		120	1379	1405	4050	2012	Dubious open reading frame; unlikely to encode a functional protein, based on available experimental and comparative sequence data; completely overlaps YBR223C; identified by gene-trapping, microarray-based expression analysis, and genome-wide homology searching	chrII	668721	668840
2				13	34	28	16
1	YBR224W		516	6568	15622	16215	11701	Dubious open reading frame; unlikely to encode a functional protein, based on available experimental and comparative sequence data; partially overlaps the verified gene TDP1	chrII	670125	670640
2				15	48	45	16
1	YBR225W		2703	1589	1555	1160	1603	Putative protein of unknown function; non-essential gene identified in a screen for mutants affected in mannosylphophorylation of cell wall components	chrII	670627	673329
2				15	60	45	21
1	YBR226C		411	361	323	353	1160	Dubious open reading frame; unlikely to encode a functional protein, based on available experimental and comparative sequence data; partially overlaps the uncharacterized ORF YBR225W	chrII	673155	673565
2				6	13	8	10
1	YBR227C	MCX1	1563	1420	3671	1835	922	Non-proteolytic ATPase of the AAA family; stimulates incorporation of the pyridoxal phosphate cofactor into Hem1p (5-aminolevulinic acid synthase); localized to the mitochondrial matrix; ortholog of vertebrate CLPX, which promotes erythropoiesis	chrII	673572	675134
2				14	43	36	17
1	YBR228W	SLX1	915	5407	4306	3374	5172	Endonuclease involved in DNA recombination and repair; subunit of a complex, with Slx4p, that hydrolyzes 5' branches from duplex DNA in response to stalled or converging replication forks; function overlaps with that of Sgs1p-Top3p	chrII	675313	676227
2				17	50	46	22
1	YBR229C	ROT2	2865	96	1074	8966	2131	Glucosidase II catalytic subunit; required to trim the final glucose in N-linked glycans; required for normal cell wall synthesis; mutations in rot2 suppress tor2 mutations, and are synthetically lethal with rot1 mutations	chrII	676357	679221
2				10	91	175	45
1	YBR230C	OM14	502	12810	10109	9797	9870	Mitochondrial outer membrane receptor for cytosolic ribosomes; integral protein of the outer membrane that interacts with the nascent chain-associated complex (NAC) bound to ribosomes, contributing to co-translational mitochondrial import; interacts with porin (Por1p) and Om45p; abundance is decreased in cells grown in glucose relative to other carbon sources	chrII	679549	680050
2				19	46	40	38
3				1240	3107	1683	529
4				5	13	12	7
1	YBR230W-A		201	3016	9018	4366	6402	Putative protein of unknown function; YBR230W-A has a paralog, COQ8, that arose from the whole genome duplication	chrII	680362	680562
2				27	70	64	47
1	YBR231C	SWC5	912	139	2186	1700	5105	Component of the SWR1 complex; complex exchanges histone variant H2AZ (Htz1p) for chromatin-bound histone H2A; protein abundance increases in response to DNA replication stress; relocalizes to the cytosol in response to hypoxia	chrII	682179	683090
2				3	53	33	33
1	YBR232C		360	1282	3560	3881	2874	Dubious open reading frame; unlikely to encode a functional protein, based on available experimental and comparative sequence data	chrII	683373	683732
2				10	35	34	17
1	YBR233W	PBP2	1242	2359	6901	4990	5335	RNA binding protein; has similarity to mammalian heterogeneous nuclear RNP K protein, involved in the regulation of telomere position effect and telomere length; relative distribution to the nucleus increases upon DNA replication stress	chrII	683428	684669
2				17	70	62	44
1	YBR233W-A	DAD3	285	0	2	7	141	Essential subunit of the Dam1 complex (aka DASH complex); complex couples kinetochores to the force produced by MT depolymerization thereby aiding in chromosome segregation; is transferred to the kinetochore prior to mitosis	chrII	684977	685261
2				0	2	3	2
1	YBR234C	ARC40	1155	0	0	0	0	Subunit of the ARP2/3 complex; ARP2/3 is required for the motility and integrity of cortical actin patches	chrII	685438	686592
2				0	0	0	0
1	YBR235W	VHC1	3363	8502	9247	7013	11508	Vacuolar membrane cation-chloride cotransporter (CCC); likely mediates K+ and Cl- cotransport into the vacuole; has a role in potassium homeostasis and salt tolerance; localizes to sites of contact between the vacuole and mitochondria (vCLAMPs); similar to mammalian electroneutral Na(+)-(K+)-C1- cotransporter family	chrII	686901	690263
2				29	115	105	91
1	YBR236C	ABD1	1311	0	205	283	99	Methyltransferase; catalyzes the transfer of a methyl group from S-adenosylmethionine to the GpppN terminus of capped mRNA; nuclear protein that relocalizes to the cytosol in response to hypoxia	chrII	690383	691693
2				0	2	2	1
1	YBR237W	PRP5	2550	0	0	89	6	RNA helicase in the DEAD-box family; necessary for prespliceosome formation, bridges U1 and U2 snRNPs and enables stable U2 snRNP association with intron RNA	chrII	691969	694518
2				0	0	6	1
1	YBR238C		2196	1384	2340	1226	1504	Mitochondrial membrane protein; not required for respiratory growth but causes a synthetic respiratory defect in combination with rmd9 mutations; transcriptionally up-regulated by TOR; deletion increases life span; YBR238C has a paralog, RMD9, that arose from the whole genome duplication	chrII	695107	697302
2				18	60	50	22
1	YBR239C	ERT1	1590	29042	30367	11311	7258	Transcriptional regulator; involved in regulation of gluconeogenesis and fermentable carbon utilization; GFP-fusion protein localizes to cytoplasm, nucleus; null mutation affects periodicity of transcriptional and metabolic oscillation; plays role in restricting Ty1 transposition; member of the zinc cluster family of proteins, similar to Rds2p	chrII	698354	699943
2				39	151	85	53
1	YBR240C	THI2	1353	6270	7680	10539	3143	Transcriptional activator of thiamine biosynthetic genes; interacts with regulatory factor Thi3p to control expression of thiamine biosynthetic genes with respect to thiamine availability; acts together with Pdc2p to respond to thiaminediphosphate demand, possibly as related to carbon source availability; zinc finger protein of the Zn(II)2Cys6 type	chrII	700490	701842
2				38	86	83	44
1	YBR241C		1467	14230	12554	8613	4342	Putative transporter, member of the sugar porter family; green fluorescent protein (GFP)-fusion protein localizes to the vacuolar membrane; YBR241C is not an essential gene; YBR241C has a paralog, VPS73, that arose from the whole genome duplication	chrII	702589	704055
2				56	134	115	32
1	YBR242W		717	11981	7921	8872	6064	Putative protein of unknown function; green fluorescent protein (GFP)-fusion protein localizes to the cytoplasm and nucleus; YBR242W is not an essential gene; YBR242W has a paralog, YGL101W, that arose from the whole genome duplication	chrII	704670	705386
2				19	56	43	27
1	YBR243C	ALG7	1347	0	24	1	3	UDP-N-acetyl-glucosamine-1-P transferase; transfers Glc-Nac-P from UDP-GlcNac to Dol-P in the ER in the first step of the dolichol pathway of protein asparagine-linked glycosylation; inhibited by tunicamycin; human homolog DPAGT1 can complement yeast ALG7 mutant	chrII	705447	706793
2				0	4	1	2
1	YBR244W	GPX2	489	939	1048	354	743	Phospholipid hydroperoxide glutathione peroxidase; protects cells from phospholipid hydroperoxides and nonphospholipid peroxides during oxidative stress; induced by glucose starvation; protein abundance increases in response to DNA replication stress	chrII	707528	708016
2				7	23	13	15
1	YBR245C	ISW1	3390	6570	10098	9654	22524	ATPase subunit of imitation-switch (ISWI) class chromatin remodelers; with Ioc3p forms Isw1a complex involved in repression of transcription initiation; with Ioc2p and Ioc4p forms Isw1b complex involved in regulation of transcription elongation; Isw1b recruited to ORFs by H3K36 methylation and acts with Chd1p to prevent trans-histone exchange over coding regions; Isw1p import into nucleus depends…	chrII	708150	711539
2				40	109	100	65
1	YBR246W	RRT2	1164	1147	1213	645	670	Methylesterase performing penultimate step of diphthamide biosynthesis; hydrolyzes methylated diphthine to produce diphthine and allows Dph6-catalyzed amidation reaction to occur; deletion leads to resistance to sordarin and accumulation of methylatediphthine; WD40 domain-containing protein; involved in endosomal recycling; forms complex with Rtt10p that functions in retromer-mediated pathway for…	chrII	711591	712754
2				19	37	28	23
1	YBR247C	ENP1	1452	15	2	3	28	Protein associated with U3 and U14 snoRNAs; required for pre-rRNA processing and 40S ribosomal subunit synthesis; localized in the nucleus and concentrated in the nucleolus; human BYSL functionally complements the heat sensitivity of an enp1 ts mutant	chrII	713004	714455
2				1	1	3	2
1	YBR248C	HIS7	1659	2516	3929	12399	8416	Imidazole glycerol phosphate synthase; glutamine amidotransferase:cyclase that catalyzes the fifth step of histidine biosynthesis and also produces 5-aminoimidazole-4-carboxamide ribotide (AICAR), a purine precursor	chrII	714807	716465
2				28	110	98	44
1	YBR249C	ARO4	1113	6984	3899	7254	1288	3-deoxy-D-arabino-heptulosonate-7-phosphate (DAHP) synthase; catalyzes the first step in aromatic amino acid biosynthesis and is feedback-inhibited by tyrosine or high concentrations of phenylalanine or tryptophan; relative distribution to the nucleus increases upon DNA replication stress	chrII	716882	717994
2				32	80	81	28
1	YBR250W	SPO23	1572	5544	6046	3197	6748	Protein of unknown function; associates with meiosis-specific protein Spo1p	chrII	719033	720604
2				27	76	59	44
1	YBR251W	MRPS5	924	1809	253	75	121	Mitochondrial ribosomal protein of the small subunit	chrII	721390	722313
2				12	6	3	9
1	YBR252W	DUT1	444	0	0	0	9	Deoxyuridine triphosphate diphosphatase (dUTPase); catalyzes hydrolysis of dUTP to dUMP and PPi, thereby preventing incorporation of uracil into DNA during replication; critical for the maintenance of genetic stability; also has diphosphatase activity on deoxyinosine triphosphate; human homolog DUT allows growth of yeast haploid dut1 null mutant after sporulation of heterozygous diploid	chrII	722611	723054
2				0	0	0	1
1	YBR253W	SRB6	366	0	74	0	458	Subunit of the RNA polymerase II mediator complex; associates with core polymerase subunits to form the RNA polymerase II holoenzyme; essential for transcriptional regulation	chrII	723270	723635
2				0	2	0	1
1	YBR254C	TRS20	528	57	18	6	148	Core component of transport protein particle (TRAPP) complexes I-III; TRAPPs are multimeric guanine nucleotide-exchange factors for GTPase Ypt1p, regulating ER-Golgi traffic (TRAPPI), intra-Golgi traffic (TRAPPII), endosome-Golgi traffic (TRAPPII and III) and autophagy (TRAPPIII); mutation leads to defects in endocytic recycling, block in sporulation/meiosis; mutations in human homolog TRAPPC2 ca…	chrII	723736	724263
2				1	2	2	1
1	YBR255C-A	RCF3	457	453	1978	1750	2713	Putative protein of unknown function; may interact with respiratory chain complexes III (ubiquinol-cytochrome c reductase) or IV (cytochrome c oxidase); identified by sequence comparison with hemiascomycetous yeast species	chrII	726618	727074
2				4	15	13	9
3				0	0	0	0
4				0	0	0	0
1	YBR255W	MTC4	2085	60	1110	1626	1658	Protein of unknown function; required for normal growth rate at 15 degrees C; green fluorescent protein (GFP)-fusion protein localizes to the cytoplasm in a punctate pattern; mtc4 is synthetically sick with cdc13-1	chrII	724456	726540
2				6	43	55	37
1	YBR256C	RIB5	717	1056	2053	4122	899	Riboflavin synthase; catalyzes the last step of the riboflavin biosynthesis pathway	chrII	727386	728102
2				4	7	7	6
1	YBR257W	POP4	840	0	0	7	9	Subunit of both RNase MRP and nuclear RNase P; RNase MRP cleaves pre-rRNA, while nuclear RNase P cleaves tRNA precursors to generate mature 5' ends and facilitates turnover of nuclear RNAs; binds to the RPR1 RNA subunit in RNase P	chrII	728885	729724
2				0	0	2	1
1	YBR258C	SHG1	429	987	531	558	272	Subunit of the COMPASS (Set1C) complex; COMPASS methylates histone H3 on lysine 4 and is required in transcriptional silencing near telomeres	chrII	729734	730162
2				11	13	16	8
1	YBR259W		2067	4120	4117	4381	4122	Protein of unknown function; YBR259W is not an essential gene; forms cytoplasmic foci upon DNA replication stress	chrII	730387	732453
2				25	71	68	39
1	YBR260C	RGD1	2001	1184	1088	1022	552	GTPase-activating protein (RhoGAP) for Rho3p and Rho4p; possibly involved in control of actin cytoskeleton organization	chrII	732639	734639
2				22	53	43	25
1	YBR261C	TAE1	699	12239	4076	5816	3316	AdoMet-dependent proline methyltransferase; catalyzes the dimethylation of ribosomal proteins Rpl12 and Rps25 at N-terminal proline residues; has a role in protein synthesis; fusion protein localizes to the cytoplasm	chrII	734832	735530
2				24	41	49	28
1	YBR262C	MIC12	321	5294	1416	455	106	Component of the MICOS complex; MICOS (formerly MINOS or MitOS) is a mitochondrial inner membrane complex that extends into the intermembrane space and has a role in the maintenance of crista junctions, inner membrane architecture, and formation of contact sites to the outer membrane; forms a subcomplex with Mic10p and Mic27p whose assembly and stability requires cardiolipin	chrII	735720	736040
2				6	25	12	4
1	YBR263W	SHM1	1473	21241	12160	6754	5271	Mitochondrial serine hydroxymethyltransferase; converts serine to glycine plus 5,10 methylenetetrahydrofolate; involved in generating precursors for purine, pyrimidine, amino acid, and lipid biosynthesis; reverse reaction generates serine	chrII	736264	737736
2				39	95	76	51
1	YBR264C	YPT10	600	9	235	186	168	Rab family GTP-binding protein; contains the PEST signal sequence specific for proteolytic enzymes; may be involved in vesicular transport; overexpression leads to accumulation of Golgi-like cisternae with budding vesicles	chrII	737770	738369
2				1	16	8	8
1	YBR265W	TSC10	963	0	0	1	0	3-ketosphinganine reductase; catalyzes the second step in phytosphingosine synthesis; essential for growth in the absence of exogenous dihydrosphingosine or phytosphingosine; localized to lipid droplets; member of short chain dehydrogenase/reductase protein family	chrII	738582	739544
2				0	0	1	0
1	YBR266C	SLM6	453	11	0	18	0	Protein with a potential role in actin cytoskeleton organization; gene exhibits synthetic genetic interaction with MSS4 encoding phosphatidylinositol 4-phosphate kinase	chrII	739936	740388
2				1	0	2	0
1	YBR267W	REI1	1182	745	934	1210	709	Cytoplasmic pre-60S factor; required for the correct recycling of shuttling factors Alb1, Arx1 and Tif6 at the end of the ribosomal large subunit biogenesis; involved in bud growth in the mitotic signaling network	chrII	739841	741022
2				3	16	20	9
1	YBR268W	MRPL37	318	40	0	8	5	Mitochondrial ribosomal protein of the large subunit	chrII	741299	741616
2				2	0	1	1
1	YBR269C	SDH8	417	51	1419	577	1794	Protein required for assembly of succinate dehydrogenase; interacts with flavinylated Sdh1p and may function as a chaperone for free Sdh1p, protecting its FAD cofactor from redox reactions before assembly of the complex; soluble protein of the mitochondrial matrix; respiratory defect of null mutant is functionally complemented by Drosophila and human orthologs	chrII	742160	742576
2				4	18	20	11
1	YBR270C	BIT2	1638	5479	4305	3971	1492	Subunit of TORC2 membrane-associated complex; involved in regulation of actin cytoskeletal dynamics during polarized growth and cell wall integrity; interacts with Slm1p and Slm2p, homologous PH domain-containing TORC2 substrates; BIT2 has a paralog, BIT61, that arose from the whole genome duplication	chrII	742761	744398
2				20	54	44	27
1	YBR271W	EFM2	1260	1465	1444	2458	2938	S-adenosylmethionine-dependent methyltransferase; seven-beta-strand lysine methyltransferase which dimethylates translation elongation factor EF2 (Eft1p and Eft2p) at lysine 613 and methylates EF3 (Yef3p) at lysine 187; green fluorescent protein (GFP)-fusion protein localizes to the cytoplasm; involved in regulation of translational termination; predicted involvement in ribosome biogenesis	chrII	744852	746111
2				8	30	30	27
1	YBR272C	HSM3	1443	179	4019	13342	8166	Evolutionarily conserved 19S regulatory particle assembly-chaperone; involved in the assembly of the base subcomplex of the 19S proteasomal regulatory particle (RP); involved in DNA mismatch repair during slow growth; weak similarity to Msh1p; structural study suggests Hsm3p is a scaffold protein for Rpt1p-Rpt2p complex formation; ortholog of human 19S subunit S5b	chrII	746361	747803
2				5	52	49	36
1	YBR273C	UBX7	1311	5940	2805	1748	4184	UBX (ubiquitin regulatory X) domain-containing protein; interacts with Cdc48p; UBX7 has a paralog, UBX6, that arose from the whole genome duplication	chrII	748061	749371
2				13	51	28	21
1	YBR274W	CHK1	1584	1861	4077	2685	1775	Serine/threonine kinase and DNA damage checkpoint effector; mediates cell cycle arrest via phosphorylation of Pds1p; phosphorylated by checkpoint signal transducer Mec1p; homolog of S. pombe and mammalian Chk1 checkpoint kinase	chrII	749594	751177
2				7	38	35	23
1	YBR275C	RIF1	5751	6720	12757	11732	7732	Protein that binds to the Rap1p C-terminus; acts synergistically with Rif2p to help control telomere length and establish telomeric silencing; involved in control of DNA replication; contributes to resection of DNA double strand breaks (DSBs); deletion results in telomere elongation	chrII	751356	757106
2				37	158	112	58
1	YBR276C	PPS1	2424	12743	7321	7587	5712	Protein phosphatase; has specificity for serine, threonine, and tyrosine residues; has a role in the DNA synthesis phase of the cell cycle	chrII	757620	760043
2				24	87	72	42
1	YBR277C		402	2875	2113	2058	2153	Dubious open reading frame; unlikely to encode a functional protein, based on available experimental and comparative sequence data; partially overlaps the verified gene YBR278W	chrII	760215	760616
2				14	34	33	15
1	YBR278W	DPB3	606	3311	3157	1938	3005	Third-largest subunit of DNA polymerase II (DNA polymerase epsilon); required to maintain fidelity of chromosomal replication and also for inheritance of telomeric silencing; stabilizes the interaction of Pol epsilon with primer-template DNA, positively affecting the processivity of the polymerase and exonuclease activities of Pol epsilon; mRNA abundance peaks at the G1/S boundary of the cell cyc…	chrII	760294	760899
2				15	43	37	21
1	YBR279W	PAF1	1338	11	796	857	912	Component of the Paf1p complex involved in transcription elongation; binds to and modulates the activity of RNA polymerases I and II; required for expression of a subset of genes, including cell cycle-regulated genes; involved in SER3 repression by helping to maintain SRG1 transcription-dependent nucleosome occupancy; homolog of human PD2/hPAF1	chrII	761257	762594
2				1	15	11	11
1	YBR280C	SAF1	1914	6238	5909	4254	4724	F-Box protein involved in proteasome-dependent degradation of Aah1p; involved in proteasome-dependent degradation of Aah1p during entry of cells into quiescence; interacts with Skp1	chrII	762784	764697
2				24	67	59	46
1	YBR281C	DUG2	2637	6191	3766	2778	2886	Component of glutamine amidotransferase (GATase II); forms a complex with Dug3p to degrade glutathione (GSH) and other peptides containing a gamma-glu-X bond in an alternative pathway to GSH degradation by gamma-glutamyl transpeptidase (Ecm38p)	chrII	764970	767606
2				30	54	48	39
1	YBR282W	MRPL27	441	102	293	1153	363	Mitochondrial ribosomal protein of the large subunit; homolog of human Bcl-2 interacting protein BMRP	chrII	768240	768680
2				5	9	6	7
1	YBR283C	SSH1	1473	333	3086	4481	1102	Subunit of the Ssh1 translocon complex; Sec61p homolog involved in co-translational pathway of protein translocation; not essential	chrII	768943	770415
2				11	54	34	19
1	YBR284W		2394	51082	30046	24313	6326	Putative metallo-dependent hydrolase superfamily protein; similar to AMP deaminases but lacks key catalytic residues and does not rescue purine nucleotide metabolic defect of quadruple aah1 ade8 amd1 his1 mutant; null mutant exhibits longer telomeres, altered Ty mobility, decreased resistance to rapamycin and wortmannin; induced in response to hydrostatic pressure; not an essential gene; YBR284W …	chrII	771239	773632
2				63	154	111	57
1	YBR285W		435	86	1175	1089	295	Putative protein of unknown function; YBR285W is not an essential gene	chrII	773922	774356
2				2	20	25	7
1	YBR286W	APE3	1614	25347	11132	8356	6365	Vacuolar aminopeptidase Y; processed to mature form by Prb1p	chrII	774700	776313
2				60	112	100	56
1	YBR287W		1284	1473	3695	6105	1114	Protein of unknown function; green fluorescent protein (GFP)-fusion protein localizes to the ER; YBR287W is not an essential gene	chrII	776571	777854
2				18	60	58	19
1	YBR288C	APM3	1452	1508	3238	2009	3214	Mu3-like subunit of the clathrin associated protein complex (AP-3); functions in transport of alkaline phosphatase to the vacuole via the alternate pathway	chrII	778012	779463
2				11	50	53	28
1	YBR289W	SNF5	2718	814	2645	772	805	Subunit of the SWI/SNF chromatin remodeling complex; involved in transcriptional regulation; functions interdependently in transcriptional activation with Snf2p and Snf6p; relocates to the cytosol under hypoxic conditions	chrII	779667	782384
2				6	19	18	18
1	YBR290W	BSD2	966	24	186	142	90	Heavy metal ion homeostasis protein; facilitates trafficking of Smf1p and Smf2p metal transporters to vacuole where they are degraded; acts as an adaptor protein with Rsp5p in the regulated endocytosis of Smf1p and is itself ubiquitylated by Rsp5p; controls metal ion transport, prevents metal hyperaccumulation, functions in copper detoxification	chrII	782591	783556
2				1	16	9	8
1	YBR291C	CTP1	900	17942	13407	17249	3374	Mitochondrial inner membrane citrate transporter; member of the mitochondrial carrier family	chrII	783673	784572
2				31	82	54	29
1	YBR292C		372	1962	2455	2748	2480	Putative protein of unknown function; conserved across S. cerevisiae strains; YBR292C is not an essential gene	chrII	784702	785073
2				13	35	28	17
1	YBR293W	VBA2	1425	12297	10310	10261	3480	Permease of basic amino acids in the vacuolar membrane	chrII	787006	788430
2				28	67	61	30
1	YBR294W	SUL1	2580	6155	8231	7520	4110	High affinity sulfate permease of the SulP anion transporter family; sulfate uptake is mediated by specific sulfate transporters Sul1p and Sul2p, which control the concentration of endogenous activated sulfate intermediates	chrII	789235	791814
2				41	97	87	43
1	YBR295W	PCA1	3651	28278	32870	21240	6459	Cadmium transporting P-type ATPase; may also have a role in copper and iron homeostasis; stabilized by Cd binding, which prevents ubiquitination; S288C and other lab strains contain a G970R mutation which eliminates Cd transport function	chrII	792849	796499
2				55	162	142	74
1	YBR296C	PHO89	1725	8409	8009	6839	2204	Plasma membrane Na+/Pi cotransporter; active in early growth phase; similar to phosphate transporters of Neurospora crassa; transcription regulated by inorganic phosphate concentrations and Pho4p; mutations in related human transporter genes hPit1 and hPit2 are associated with hyperphosphatemia-induced calcification of vascular tissue and familial idiopathic basal ganglia calcification	chrII	796798	798522
2				16	55	47	31
1	YBR296C-A		120	1113	2813	1234	824	Putative protein of unknown function; identified by gene-trapping, microarray-based expression analysis, and genome-wide homology searching	chrII	800123	800242
2				16	18	23	8
1	YBR297W	MAL33	1407	1751	6127	6704	2451	MAL-activator protein; part of complex locus MAL3; nonfunctional in genomic reference strain S288C	chrII	800523	801929
2				15	57	70	27
1	YBR298C	MAL31	1845	185079	7639	4514	3134	Maltose permease; high-affinity maltose transporter (alpha-glucoside transporter); encoded in the MAL3 complex locus; member of the 12 transmembrane domain superfamily of sugar transporters; functional in genomic reference strain S288C	chrII	802631	804475
2				20	68	55	36
1	YBR298C-A		222	12625	27457	19199	16326	Putative protein of unknown function; identified by gene-trapping, microarray-based expression analysis, and genome-wide homology searching	chrII	805035	805256
2				21	42	37	26
1	YBR299W	MAL32	1755	13172	11346	11910	6257	Maltase (alpha-D-glucosidase); inducible protein involved in maltose catabolism; encoded in the MAL3 complex locus; functional in genomic reference strain S288C; hydrolyzes the disaccharides maltose, turanose, maltotriose, and sucrose	chrII	805351	807105
2				31	96	84	61
1	YBR300C		498	3531	12339	6364	5386	Dubious open reading frame; unlikely to encode a functional protein, based on available experimental and comparative sequence data; partially overlaps the verified gene YBR301W; YBR300C is not an essential gene	chrII	808600	809097
2				21	42	36	19
1	YBR301W	PAU24	363	9296	6424	3674	1471	Cell wall mannoprotein; has similarity to Tir1p, Tir2p, Tir3p, and Tir4p; member of the seripauperin multigene family encoded mainly in subtelomeric regions; expressed under anaerobic conditions, completely repressed during aerobic growth	chrII	809057	809419
2				13	25	22	15
1	YBR302C	COS2	1140	4261	11759	8905	5751	Endosomal protein involved in turnover of plasma membrane proteins; member of the DUP380 subfamily of conserved, often subtelomeric COS genes; required for the multivesicular vesicle body sorting pathway that internalizes plasma membrane proteins for degradation; Cos proteins provide ubiquitin in trans for nonubiquitinated cargo proteins	chrII	810340	811479
2				21	64	57	40
1	YCL001W	RER1	567	22	156	88	87	Protein involved in retention of membrane proteins; including Sec12p, in the ER; localized to Golgi; functions as a retrieval receptor in returning membrane proteins to the ER	chrIII	111916	112482
2				3	18	18	10
1	YCL001W-A		462	661	824	488	486	Putative protein of unknown function; YCL001W-A gene has similarity to DOM34 and is present in a region duplicated between chromosomes XIV and III	chrIII	113080	113541
2				8	13	21	10
1	YCL001W-B		255	12061	6253	5084	3446	Putative protein of unknown function; present in a region duplicated between chromosomes XIV and III; YCL001W-B has a paralog, DOM34, that arose from the whole genome duplication	chrIII	113770	114024
2				22	42	36	26
1	YCL002C		868	1418	2090	2340	1090	Putative protein of unknown function; YCL002C is not an essential gene	chrIII	110808	111675
2				18	38	45	21
3				227	82	68	244
4				4	4	4	3
1	YCL004W	PGS1	1566	40	35	29	18	Phosphatidylglycerolphosphate synthase; catalyzes the synthesis of phosphatidylglycerolphosphate from CDP-diacylglycerol and sn-glycerol 3-phosphate in the first committed and rate-limiting step of cardiolipin biosynthesis	chrIII	109105	110670
2				2	1	4	1
1	YCL005W	LDB16	771	1351	911	736	434	Protein involved in lipid droplet (LD) assembly; forms a complex with Sei1p at ER-LD contact sites, stabilizing contact sites; ensures that LDs bud from the ER towards the cytosolic side of the membrane; null mutants have decreased net negative cell surface charge and localized accumulation of phosphatidic acid (PA) marker proteins; GFP-fusion protein expression is induced in response to MMS; nul…	chrIII	108021	108791
2				13	28	20	17
1	YCL005W-A	VMA9	395	61	19	113	319	Vacuolar H+ ATPase subunit e of the V-ATPase V0 subcomplex; essential for vacuolar acidification; interacts with the V-ATPase assembly factor Vma21p in the ER; involved in V0 biogenesis	chrIII	107023	107417
2				1	2	1	2
3				0	0	0	0
4				0	0	0	0
1	YCL007C		393	0	0	0	0	Dubious open reading frame; unlikely to encode a functional protein, based on available experimental and comparative sequence data; overlaps verified ORF YCL005W-A; mutations in YCL007C were thought to confer sensitivity to calcofluor white, but this phenotype was later shown to be due to the defect in YCL005W-A	chrIII	106974	107366
2				0	0	0	0
1	YCL008C	STP22	1158	863	980	536	1884	Component of the ESCRT-I complex; ESCRT-I is involved in ubiquitin-dependent sorting of proteins into the endosome; prevents polyubiquitination of the arrestin-related protein Rim8p, thereby directing its monoubiquitination by Rsp5p; homologous to the mouse and human Tsg101 tumor susceptibility gene; mutants exhibit a Class E Vps phenotype;	chrIII	105696	106853
2				1	9	6	4
1	YCL009C	ILV6	930	5543	830	6085	2480	Regulatory subunit of acetolactate synthase; acetolactate synthase catalyzes the first step of branched-chain amino acid biosynthesis; enhances activity of the Ilv2p catalytic subunit, localizes to mitochondria	chrIII	104619	105548
2				28	52	67	38
1	YCL010C	SGF29	780	439	4185	403	646	Component of the HAT/Core module of the SAGA, SLIK, and ADA complexes; HAT/Core module also contains Gcn5p, Ngg1p, and Ada2p; binds methylated histone H3K4; involved in transcriptional regulation through SAGA and TBP recruitment to target promoters and H3 acetylation	chrIII	103571	104350
2				7	47	27	23
1	YCL011C	GBP2	1284	15381	4333	3444	9871	Poly(A+) RNA-binding protein; key surveillance factor for the selective export of spliced mRNAs from the nucleus to the cytoplasm; preference for intron-containing genes; similar to Npl3p; also binds single-stranded telomeric repeat sequence in vitro; relocalizes to the cytosol in response to hypoxia; GBP2 has a paralog, HRB1, that arose from the whole genome duplication	chrIII	102075	103358
2				36	66	58	47
1	YCL012C		472	2448	1558	1241	2795	Protein of unknown function; SWAT-GFP and mCherry fusion proteins localize to the endoplasmic reticulum and vacuole respectively; orthologs are present in S. bayanus, S. paradoxus and Ashbya gossypii; YCL012C is not an essential gene	chrIII	101317	101788
2				7	17	15	18
3				556	750	724	643
4				4	6	11	8
1	YCL014W	BUD3	4911	3647	5197	5883	4482	Guanine nucleotide exchange factor (GEF) for Cdc42p; activates Cdc42p in early G1, accounting for the first stage of biphasic activation, with Cdc24p accounting for the second stage in late G1; involved in the Cdc42p-mediated assembly of the axial landmark that dictates the site for the next round of budding, resulting in the axial budding pattern observed in haploids; localizes with septins to t…	chrIII	96281	101191
2				26	86	85	36
1	YCL016C	DCC1	1143	889	686	651	386	Subunit of a complex with Ctf8p and Ctf18p; shares some components with Replication Factor C; required for sister chromatid cohesion and telomere length maintenance	chrIII	94621	95763
2				21	32	22	10
1	YCL017C	NFS1	1494	0	43	3769	1411	Cysteine desulfurase; involved in iron-sulfur cluster (Fe/S) biogenesis and in thio-modification of mitochondrial and cytoplasmic tRNAs; essential protein located predominantly in mitochondria	chrIII	92777	94270
2				0	3	4	1
1	YCL018W	LEU2	1095	12482	12858	14958	3725	Beta-isopropylmalate dehydrogenase (IMDH); catalyzes the third step in the leucine biosynthesis pathway; can additionally catalyze the conversion of beta-ethylmalate into alpha-ketovalerate	chrIII	91324	92418
2				49	88	91	37
1	YCL021W		354	318352	268401	243797	144120	Deleted ORF; does not encode a protein; originally included in genome annotation, but later deleted due to sequence correction	chrIII	84076	84429
2				575	1106	958	695
1	YCL021W-A		378	151898	173723	140447	94388	Putative protein of unknown function; SWAT-GFP and mCherry fusion proteins localize to the vacuole	chrIII	83620	83997
2				262	464	408	308
1	YCL022C		516	17626	13401	12891	2363	Dubious open reading frame; unlikely to encode a functional protein, based on available experimental and comparative sequence data; completely overlaps verified gene KCC4/YCL024W	chrIII	81570	82085
2				22	62	53	27
1	YCL023C		348	663	744	298	539	Dubious open reading frame; unlikely to encode a functional protein, based on available experimental and comparative sequence data; partially overlaps verified ORF KCC4	chrIII	78949	79296
2				7	12	12	8
1	YCL024W	KCC4	3114	3580	2965	2688	5065	Protein kinase of the bud neck involved in the septin checkpoint; associates with septin proteins, negatively regulates Swe1p by phosphorylation, shows structural homology to bud neck kinases Gin4p and Hsl1p; KCC4 has a paralog, GIN4, that arose from the whole genome duplication	chrIII	79162	82275
2				20	40	32	18
1	YCL025C	AGP1	1902	4609	6613	4902	3420	Low-affinity amino acid permease with broad substrate range; involved in uptake of asparagine, glutamine, and other amino acids; expression regulated by SPS plasma membrane amino acid sensor system (Ssy1p-Ptr3p-Ssy5p); AGP1 has a paralog, GNP1, that arose from the whole genome duplication	chrIII	76018	77919
2				23	92	82	51
1	YCL026C		360	7674	12765	11428	2633	Deleted ORF; does not encode a protein; included in the original annotation of Chromosome III but later deleted due to sequence corrections	chrIII	74686	75045
2				61	138	173	74
1	YCL026C-A	FRM2	582	2396	2969	3900	1947	Type II nitroreductase, using NADH as reductant; mutants are defective in fatty acid mediated repression of genes involved in fatty acid biosynthesis indicative of a role in lipid signaling; involved in the oxidative stress response; transcription induction by cadmium and selenite indicates a possible role in the metal stress response; expression induced in cells treated with the mycotoxin patulin	chrIII	74704	75285
2				15	36	27	17
1	YCL026C-B	HBN1	582	5668	4895	3070	2510	Protein of unknown function; similar to bacterial nitroreductases; green fluorescent protein (GFP)-fusion protein localizes to the cytoplasm and nucleus; protein becomes insoluble upon intracellular iron depletion; protein abundance increases in response to DNA replication stress	chrIII	73405	73986
2				14	32	25	19
1	YCL027W	FUS1	1539	5443	3882	3843	2231	Membrane protein localized to the shmoo tip; required for cell fusion; expression regulated by mating pheromone; proposed to coordinate signaling, fusion, and polarization events required for fusion; potential Cdc28p substrate	chrIII	71803	73341
2				24	61	54	28
1	YCL028W	RNQ1	1218	8183	4558	5672	5073	[PIN(+)] prion; an infectious protein conformation that is generally an ordered protein aggregate	chrIII	70150	71367
2				13	35	31	19
1	YCL029C	BIK1	1323	26169	7780	10397	8024	Microtubule-associated protein; component of the interface between microtubules and kinetochore, involved in sister chromatid separation; essential in polyploid cells but not in haploid or diploid cells; ortholog of mammalian CLIP-170	chrIII	68599	69921
2				41	72	96	38
1	YCL030C	HIS4	2400	17118	19614	56493	6693	Multifunctional enzyme containing phosphoribosyl-ATP pyrophosphatase; phosphoribosyl-AMP cyclohydrolase, and histidinol dehydrogenase activities; catalyzes the second, third, ninth and tenth steps in histidine biosynthesis	chrIII	65934	68333
2				76	187	234	85
1	YCL031C	RRP7	894	0	75	64	1	Essential protein involved in rRNA processing and ribosome biogenesis; protein abundance increases in response to DNA replication stress	chrIII	64675	65568
2				0	3	2	1
1	YCL032W	STE50	1041	26498	3091	5040	4830	Adaptor protein for various signaling pathways; involved in mating response, invasive/filamentous growth, osmotolerance; acts as an adaptor that links G protein-associated Cdc42p-Ste20p complex to the effector Ste11p to modulate signal transduction	chrIII	63441	64481
2				19	37	29	21
1	YCL033C	MXR2	507	5524	2318	2150	2108	Methionine-R-sulfoxide reductase; involved in the response to oxidative stress; protects iron-sulfur clusters from oxidative inactivation along with MXR1; involved in the regulation of lifespan	chrIII	62776	63282
2				14	30	27	17
1	YCL034W	LSB5	1065	1281	2896	1033	993	Protein involved in membrane-trafficking events at plasma membrane; interacts with actin regulators Sla1p and Las17p, ubiquitin, Arf3p to couple actin dynamics to membrane trafficking processes; similar structure to GGA family of proteins with N-terminal VHS domain and GAT domain; binds Las17p, which is homolog of human Wiskott-Aldrich Syndrome protein involved in actin patch assembly, actin poly…	chrIII	61658	62722
2				11	41	31	11
1	YCL035C	GRX1	333	1237	1523	2091	1453	Glutathione-dependent disulfide oxidoreductase; hydroperoxide and superoxide-radical responsive, heat-stable, with active site cysteine pair; protects cells from oxidative damage; GRX1 has a paralog, GRX2, that arose from the whole genome duplication; protein abundance increases in response to DNA replication stress	chrIII	60841	61173
2				6	19	21	15
1	YCL036W	GFD2	1701	14485	11984	7063	9115	Protein of unknown function; identified as a high-copy suppressor of a dbp5 mutation; GFD2 has a paralog, YDR514C, that arose from the whole genome duplication	chrIII	59026	60726
2				25	93	77	46
1	YCL037C	SRO9	1305	2010	4510	2900	15816	Cytoplasmic RNA-binding protein; shuttles between nucleus and cytoplasm and is exported from the nucleus in an mRNA export-dependent manner; associates with translating ribosomes; involved in heme regulation of Hap1p as a component of the HMC complex, also involved in the organization of actin filaments; contains a La motif; SRO9 has a paralog, SLF1, that arose from the whole genome duplication	chrIII	57374	58678
2				15	44	32	41
1	YCL038C	ATG22	1587	1562	2343	2452	932	Vacuolar integral membrane protein required for efflux of amino acids; required for efflux of amino acids during autophagic body breakdown in the vacuole; null mutation causes a gradual loss of viability during starvation	chrIII	54941	56527
2				14	53	46	23
1	YCL039W	GID7	2238	1160	3672	6886	15203	Subunit of GID Complex that binds directly to central component Vid30p; GID complex is involved in proteasome-dependent catabolite inactivation of fructose-1,6-bisphosphatase; Gid7p contains six WD40 repeats; computational analysis suggests that Gid7p and Moh1p have similar functions	chrIII	52645	54882
2				26	87	80	57
1	YCL040W	GLK1	1503	38104	82955	93710	10081	Glucokinase; catalyzes the phosphorylation of glucose at C6 in the first irreversible step of glucose metabolism; one of three glucose phosphorylating enzymes; expression regulated by non-fermentable carbon sources; GLK1 has a paralog, EMI2, that arose from the whole genome duplication	chrIII	50838	52340
2				125	278	238	118
1	YCL041C		495	1206	431	1127	2174	Dubious open reading frame; unlikely to encode a functional protein, based on available experimental and comparative sequence data; partially overlaps both the verified gene PDI1/YCL043C and the uncharacterized gene YCL042W	chrIII	50133	50627
2				26	39	40	37
1	YCL042W		360	3469	5479	9717	2880	Putative protein of unknown function; epitope-tagged protein localizes to the cytoplasm	chrIII	50584	50943
2				28	60	55	42
1	YCL043C	PDI1	1569	89	30	179	46	Protein disulfide isomerase; multifunctional oxidoreductase of the ER lumen, essential for disulfide bond formation in secretory and cell-surface proteins, processing of non-native disulfide bonds; Ero1p activator; complexes with exomannosidase, Mnl1p to facilitate the recognition of misfolded glycoproteins and the trimming of glycan Man8GlcNAc2 to Man7GlcNAc2 on substrates, thereby accelerating …	chrIII	48653	50221
2				3	1	7	2
1	YCL044C	MGR1	1254	8599	11835	5069	3097	Subunit of the mitochondrial (mt) i-AAA protease supercomplex; i-AAA degrades misfolded mitochondrial proteins; forms a subcomplex with Mgr3p that binds to substrates to facilitate proteolysis; required for growth of cells lacking mtDNA	chrIII	47111	48364
2				26	85	71	37
1	YCL045C	EMC1	2283	4131	3255	2716	2390	Member of conserved endoplasmic reticulum membrane complex; involved in efficient folding of proteins in the ER; null mutant displays induction of the unfolded protein response; interacts with Gal80p; homologous to worm H17B01.4/EMC-1, fly CG2943, and human KIAA0090	chrIII	44623	46905
2				24	57	45	23
1	YCL046W		324	4198	2203	1377	2243	Dubious open reading frame; unlikely to encode a functional protein, based on available experimental and comparative sequence data; partially overlaps the uncharacterized ORF YCL045C	chrIII	46640	46963
2				9	23	15	13
1	YCL047C	POF1	777	1332	570	1513	504	Nicotinamide mononucleotide-specific adenylyltransferase (NMNAT); catalyzes the conversion of nicotinamide mononucleotide (NMN) to nicotinamide adenine dinucleotide (NAD+); role in the nicotinamide riboside (NR) salvage pathway of NAD+ biosynthesis; involved in NR and NAD+ homeostasis; ATPase involved in protein quality control and filamentation pathways; interacts physically with Kss1p and suppr…	chrIII	43661	44437
2				5	23	16	8
1	YCL048W	SPS22	1392	5682	1907	2931	2729	Protein of unknown function; SPS22 has a paralog, SPS2, that arose from the whole genome duplication; redundant with Sps2p for the organization of the beta-glucan layer of the spore wall	chrIII	42165	43556
2				17	43	40	22
1	YCL048W-A		240	163	168	390	313	Putative protein of unknown function; SWAT-GFP and mCherry fusion proteins localize to the cell periphery and vacuole; YCL048W-A has a paralog, YDR524C-B, that arose from the whole genome duplication	chrIII	41488	41727
2				2	6	6	4
1	YCL049C		939	1743	5519	4099	3732	Protein of unknown function; localizes to membrane fraction; YCL049C is not an essential gene	chrIII	39786	40724
2				20	47	40	27
1	YCL050C	APA1	966	331	518	686	209	AP4A phosphorylase; bifunctional diadenosine 5',5'''-P1,P4-tetraphosphate phosphorylase and ADP sulfurylase involved in catabolism of bis(5'-nucleosidyl) tetraphosphates; catalyzes phosphorolysis of dinucleoside oligophosphates, cleaving substrates' alpha/beta-anhydride bond and introducing Pi into the beta-position of the corresponding NDP formed; protein abundance increases under DNA replicatio…	chrIII	37836	38801
2				1	18	12	7
1	YCL051W	LRE1	1752	1431	1750	5478	878	Protein involved in control of cell wall structure and stress response; direct inhibitor of the nuclear Dbf2 related (NDR) kinase Cbk1p-Mob2p; overproduction confers resistance to cell-wall degrading enzymes; exhibits genetic interactions with genes involved in the cell wall integrity pathway; LRE1 has a paralog, HLR1, that arose from the whole genome duplication	chrIII	35865	37616
2				12	39	38	21
1	YCL052C	PBN1	1251	1	330	159	449	Component of glycosylphosphatidylinositol-mannosyltransferase I; essential component; required for the autocatalytic post-translational processing of the protease B precursor Prb1p; localizes to ER in lumenal orientation; homolog of mammalian PIG-X	chrIII	34143	35393
2				1	5	6	6
1	YCL054W	SPB1	2526	3	5	12	4	AdoMet-dependent methyltransferase; involved in rRNA processing and 60S ribosomal subunit maturation; methylates G2922 in the tRNA docking site of the large subunit rRNA and in the absence of snR52, U2921; suppressor of PAB1 mutants	chrIII	31449	33974
2				1	2	6	1
1	YCL055W	KAR4	1008	10333	8385	6776	8569	Transcription factor required for response to pheromones; also required during meiosis; exists in two forms, a slower-migrating form more abundant during vegetative growth and a faster-migrating form induced by pheromone	chrIII	27929	28936
2				23	49	61	44
1	YCL056C	PEX34	435	148	711	871	76	Protein that regulates peroxisome populations; peroxisomal integral membrane protein; interacts with Pex11p, Pex25p, and Pex27p to control both constitutive peroxisome division and peroxisome morphology and abundance during peroxisome proliferation	chrIII	26925	27359
2				1	10	15	7
1	YCL057C-A	MIC10	294	4188	2223	1942	7553	Conserved component of the MICOS complex; MICOS (formerly MINOS or MitOS) is a mitochondrial inner membrane complex that extends into the intermembrane space and has a role in the maintenance of crista junctions, inner membrane architecture, and formation of contact sites to the outer membrane; forms a subcomplex with Mic12p and Mic27p whose assembly and stability requires cardiolipin; homo-oligo…	chrIII	24032	24325
2				14	34	32	29
1	YCL057W	PRD1	2139	2821	3625	3113	4902	Zinc metalloendopeptidase; found in the cytoplasm and intermembrane space of mitochondria; with Cym1p, involved in degradation of mitochondrial proteins and of presequence peptides cleaved from imported proteins; protein abundance increases in response to DNA replication stress	chrIII	24768	26906
2				14	66	57	48
1	YCL058C	FYV5	459	3220	1190	1021	436	Protein involved in regulation of the mating pathway; binds with Matalpha2p to promoters of haploid-specific genes; required for survival upon exposure to K1 killer toxin; involved in ion homeostasis	chrIII	23523	23981
2				10	29	24	9
1	YCL058W-A	ADF1	342	3013	198	339	297	Transcriptional repressor encoded by the FYV5 antisense strand; negatively regulates transcription of FYV5 by binding to the promoter on the sense strand	chrIII	23584	23925
2				5	16	10	4
1	YCL059C	KRR1	951	58	9	300	29	Nucleolar protein required for rRNA synthesis and ribosomal assembly; required for the synthesis of 18S rRNA and for the assembly of 40S ribosomal subunit; essential gene	chrIII	22429	23379
2				1	3	2	3
1	YCL061C	MRC1	3291	1488	6449	6017	1554	S-phase checkpoint protein required for DNA replication; couples DNA helicase and polymerase; interacts with and stabilizes Pol2p at stalled replication forks during stress, where it forms a pausing complex with Tof1p and is phosphorylated by Mec1p; defines a novel S-phase checkpoint with Hog1p that coordinates DNA replication and transcription upon osmostress; protects uncapped telomeres; Dia2p-…	chrIII	18816	22106
2				15	65	56	20
1	YCL063W	VAC17	1272	258	2209	760	1427	Phosphoprotein involved in vacuole inheritance; degraded in late M phase of the cell cycle; acts as a vacuole-specific receptor for myosin Myo2p; involved in regulation of asymmetric inheritance of aggregated/misfolded proteins and age reset	chrIII	17290	18561
2				7	38	28	20
1	YCL064C	CHA1	1083	1733	860	1014	1109	Catabolic L-serine (L-threonine) deaminase; catalyzes the degradation of both L-serine and L-threonine; required to use serine or threonine as the sole nitrogen source, transcriptionally induced by serine and threonine	chrIII	15798	16880
2				7	18	18	10
1	YCL065W		369	2439	2108	2251	1550	Dubious open reading frame; unlikely to encode a functional protein, based on available experimental and comparative sequence data; overlaps HMLALPHA1	chrIII	13751	14119
2				11	36	24	14
1	YCL066W	HMLALPHA1	528	320	873	1298	260	Silenced copy of ALPHA1 at HML; ALPHA1 encodes a transcriptional coactivator involved in the regulation of mating-type alpha-specific gene expression	chrIII	13282	13809
2				5	17	15	3
1	YCL067C	HMLALPHA2	633	2066	2007	1189	3024	Silenced copy of ALPHA2 at HML; homeobox-domain protein that associates with Mcm1p in haploid cells to repress a-specific gene expression and interacts with a1p in diploid cells to repress haploid-specific gene expression	chrIII	12386	13018
2				14	35	32	27
1	YCL068C		783	1826	2632	2297	1209	Putative protein of unknown function	chrIII	11503	12285
2				17	39	39	20
1	YCL069W	VBA3	1377	1773	2511	1094	1139	Permease of basic amino acids in the vacuolar membrane; VBA3 has a paralog, VBA5, that arose from a segmental duplication	chrIII	9706	11082
2				13	40	24	15
1	YCL073C	GEX1	1848	3201	3103	2049	1102	Proton:glutathione antiporter; localized to the vacuolar and plasma membranes; imports glutathione from the vacuole and exports it through the plasma membrane; has a role in resistance to oxidative stress and modulation of the PKA pathway; GEX1 has a paralog, GEX2, that arose from a segmental duplication	chrIII	6479	8326
2				13	49	39	25
1	YCL076W		744	86	355	50	0	Dubious open reading frame; unlikely to encode a functional protein, based on available experimental and comparative sequence data	chrIII	1392	2135
2				2	4	2	0
1	YCR001W		315	5988	2491	2432	1363	Putative protein of unknown function; conserved among S. cerevisiae strains; YCR001W is not an essential gene	chrIII	115685	115999
2				14	20	15	19
1	YCR002C	CDC10	969	0	0	0	14	Component of the septin ring, required for cytokinesis; septins are GTP-binding proteins that assemble into rod-like hetero-oligomers that can associate to form filaments; septin rings at the mother-bud neck act as scaffolds for recruiting cell division factors and as barriers to prevent diffusion of specific proteins between mother and daughter cells; N-terminus interacts with phosphatidylinosit…	chrIII	117380	118348
2				0	0	0	1
1	YCR003W	MRPL32	552	594	144	262	82	Mitochondrial ribosomal protein of the large subunit; protein abundance increases in response to DNA replication stress	chrIII	118620	119171
2				11	7	6	7
1	YCR004C	YCP4	744	29561	10092	10681	5697	Protein of unknown function; has sequence and structural similarity to flavodoxins; predicted to be palmitoylated; the authentic, non-tagged protein is detected in highly purified mitochondria in high-throughput studies	chrIII	119575	120318
2				28	60	53	35
1	YCR005C	CIT2	1383	6532	29247	22761	3486	Citrate synthase, peroxisomal isozyme involved in glyoxylate cycle; catalyzes condensation of acetyl coenzyme A and oxaloacetate to form citrate; expression is controlled by Rtg1p and Rtg2p transcription factors; SCF-Ucc1 regulates level of Cit2p to maintain citrate homeostasis; oxaloacetate-dependent positive feedback loop inhibits Cit2p ubiquitination; CIT2 has a paralog, CIT1, that arose from …	chrIII	120946	122328
2				69	140	134	54
1	YCR006C		474	53631	70337	80538	28940	Putative protein of unknown function; conserved among S. cerevisiae strains; YCR006C is not an essential gene	chrIII	122530	123003
2				83	177	160	105
1	YCR007C		720	20199	12224	8800	6272	Putative integral membrane protein; member of DUP240 gene family; SWAT-GFP and mCherry fusion proteins localize to the cell periphery and vacuole; YCR007C is not an essential gene	chrIII	126011	126730
2				28	47	43	33
1	YCR008W	SAT4	1812	1814	748	911	371	Ser/Thr protein kinase involved in salt tolerance; funtions in regulation of Trk1p-Trk2p potassium transporter; overexpression affects the Fe-S and lipoamide containing proteins in the mitochondrion; required for lipoylation of Lat1p, Kgd2p and Gcv3p; partially redundant with Hal5p; has similarity to Npr1p; localizes to the cytoplasm and mitochondrion	chrIII	128470	130281
2				14	41	37	17
1	YCR009C	RVS161	798	0	146	143	561	Amphiphysin-like lipid raft protein; N-BAR domain protein that interacts with Rvs167p and regulates polarization of the actin cytoskeleton, endocytosis, cell polarity, cell fusion and viability following starvation or osmotic stress	chrIII	130745	131542
2				0	15	11	8
1	YCR010C	ADY2	852	5386	3334	3100	3926	Acetate transporter required for normal sporulation; phosphorylated in mitochondria; ADY2 has a paralog, ATO2, that arose from the whole genome duplication	chrIII	132273	133124
2				25	52	43	36
1	YCR011C	ADP1	3150	10194	11214	25602	7802	Putative ATP-dependent permease of the ABC transporter family	chrIII	133724	136873
2				55	146	123	67
1	YCR012W	PGK1	1251	0	15	22	0	3-phosphoglycerate kinase; catalyzes transfer of high-energy phosphoryl groups from the acyl phosphate of 1,3-bisphosphoglycerate to ADP to produce ATP; key enzyme in glycolysis and gluconeogenesis	chrIII	137746	138996
2				0	1	2	0
1	YCR013C		648	502	379	385	0	Dubious open reading frame; unlikely to encode a functional protein, based on available experimental and comparative sequence data; transcription of both YCR013C and the overlapping essential gene PGK1 is reduced in a gcr1 null mutant	chrIII	138402	139049
2				2	3	3	0
1	YCR014C	POL4	1749	1643	2665	4358	4125	DNA polymerase IV; undergoes pair-wise interactions with Dnl4p-Lif1p and Rad27p to mediate repair of DNA double-strand breaks by non-homologous end joining (NHEJ); homologous to mammalian DNA polymerase beta	chrIII	139185	140933
2				10	52	39	30
1	YCR015C	CTO1	954	1489	1635	1137	1813	Protein required for cold tolerance; involved in phosphate uptake; YCR015C is not an essential gene	chrIII	141217	142170
2				6	33	27	17
1	YCR016W		873	4796	787	773	911	Putative protein of unknown function; green fluorescent protein (GFP)-fusion protein localizes to the nucleolus and nucleus; predicted to be involved in ribosome biogenesis	chrIII	143634	144506
2				11	16	14	7
1	YCR017C	CWH43	2862	41	1149	437	1364	GPI lipid remodelase; responsible for introducing ceramides into GPI anchors having a C26:0 fatty acid in sn-2 of the glycerol moiety; can also use lyso-GPI protein anchors and various base resistant lipids as substrates; contains 14-16 transmembrane segments and several putative glycosylation and phosphorylation sites; null mutation is synthetically lethal with pkc1 deletion	chrIII	144773	147634
2				3	82	43	46
1	YCR018C	SRD1	666	4300	2002	1662	1366	Protein involved in the processing of pre-rRNA to mature rRNA; contains a C2/C2 zinc finger motif; srd1 mutation suppresses defects caused by the rrp1-1 mutation	chrIII	148238	148903
2				22	38	31	17
1	YCR018C-A		255	3524	3966	3299	809	Putative protein of unknown function; encoded opposite a Ty1 LTR	chrIII	151608	151862
2				8	24	18	8
1	YCR019W	MAK32	1092	2431	2659	2113	2152	Protein necessary for stability of L-A dsRNA-containing particles	chrIII	152837	153928
2				10	29	25	13
1	YCR020C	PET18	648	561	1139	1501	216	Protein of unknown function; has weak similarity to proteins involved in thiamin metabolism; expression is induced in the absence of thiamin	chrIII	154012	154659
2				10	25	24	10
1	YCR020C-A	MAK31	267	7	580	2411	1546	Non-catalytic subunit of N-terminal acetyltransferase of the NatC type; required for replication of dsRNA virus; member of the Sm protein family	chrIII	154830	155096
2				2	7	9	6
1	YCR020W-B	HTL1	237	0	65	0	3	Component of the RSC chromatin remodeling complex; RSC functions in transcriptional regulation and elongation, chromosome stability, and establishing sister chromatid cohesion; involved in telomere maintenance	chrIII	155320	155556
2				0	1	0	1
1	YCR021C	HSP30	999	12296	9131	8051	2647	Negative regulator of the H(+)-ATPase Pma1p; stress-responsive protein; hydrophobic plasma membrane localized; induced by heat shock, ethanol treatment, weak organic acid, glucose limitation, and entry into stationary phase	chrIII	156109	157107
2				25	86	65	40
1	YCR022C		345	774	1428	2705	587	Putative protein of unknown function; conserved among S. cerevisiae strains; YCR022C is not an essential gene	chrIII	157421	157765
2				15	46	48	28
1	YCR023C		1836	795	3315	1707	1810	Vacuolar membrane protein of unknown function; member of the multidrug resistance family; YCR023C is not an essential gene	chrIII	158538	160373
2				12	61	47	40
1	YCR024C	SLM5	1479	394	131	211	231	Mitochondrial asparaginyl-tRNA synthetase	chrIII	160744	162222
2				11	8	5	15
1	YCR024C-A	PMP1	123	523	675	312	54	Regulatory subunit for the plasma membrane H(+)-ATPase Pma1p; small single-membrane span proteolipid; forms unique helix and positively charged cytoplasmic domain that is able to specifically segregate phosphatidylserines; PMP1 has a paralog, PMP2, that arose from the whole genome duplication	chrIII	162945	163067
2				5	8	10	5
1	YCR024C-B		267	2520	3644	2435	666	Putative protein of unknown function; identified by expression profiling and mass spectrometry	chrIII	162599	162865
2				16	33	34	24
1	YCR025C		411	34038	27863	24563	22487	Putative protein of unknown function; conserved across S. cerevisiae strains; YCR025C is not an essential gene	chrIII	163446	163856
2				73	103	95	70
1	YCR026C	NPP1	2229	23919	26120	18557	12662	Nucleotide pyrophosphatase/phosphodiesterase; mediates extracellular nucleotide phosphate hydrolysis along with Npp2p and Pho5p; activity and expression enhanced during conditions of phosphate starvation; involved in spore wall assembly; NPP1 has a paralog, NPP2, that arose from the whole genome duplication, and an npp1 npp2 double mutant exhibits reduced dityrosine fluorescence relative to the s…	chrIII	164111	166339
2				63	155	137	98
1	YCR027C	RHB1	630	183	594	925	1469	Putative Rheb-related GTPase; involved in regulating canavanine resistance and arginine uptake; member of the Ras superfamily of G-proteins	chrIII	167370	167999
2				3	17	15	9
1	YCR028C	FEN2	1539	0	438	124	141	Plasma membrane H+-pantothenate symporter; confers sensitivity to the antifungal agent fenpropimorph; relocalizes from vacuole to cytoplasm upon DNA replication stress	chrIII	170886	172424
2				0	12	6	5
1	YCR028C-A	RIM1	491	1056	0	0	42	ssDNA-binding protein essential for mitochondrial genome maintenance; involved in mitochondrial DNA replication; stimulates utilization by Mip1p DNA polymerase of RNA primers synthesized by Rpo41p	chrIII	172950	173440
2				6	0	0	2
3				0	0	0	0
4				0	0	0	0
1	YCR030C	SYP1	2613	420	4115	2350	3260	Negative regulator of WASP-Arp23 complex; involved in endocytic site formation; directly inhibits Las17p stimulation of Arp23 complex-mediated actin assembly in vitro; may regulate assembly and disassembly of the septin ring; colocalizes and interacts with septin subunits; potential role in actin cytoskeletal organization	chrIII	173826	176438
2				15	70	63	36
1	YCR031C	RPS14A	721	3270	5010	4075	2758	Protein component of the small (40S) ribosomal subunit; required for ribosome assembly and 20S pre-rRNA processing; mutations confer cryptopleurine resistance; homologous to mammalian ribosomal protein S14 and bacterial S11; RPS14A has a paralog, RPS14B, that arose from the whole genome duplication	chrIII	177500	178220
2				9	36	30	23
3				170	745	439	89
4				4	17	18	7
1	YCR032W	BPH1	6504	2403	4871	3250	5049	Protein homologous to Chediak-Higashi syndrome and Beige proteins; both of which are implicated in disease syndromes in human and mouse, respectively, due to defective lysosomal trafficking; mutant phenotype and genetic interactions suggest a role in protein sorting	chrIII	179520	186023
2				45	132	113	63
1	YCR033W	SNT1	3681	2019	6167	14230	27757	Subunit of the Set3C deacetylase complex; interacts directly with the Set3C subunit, Sif2p; putative DNA-binding protein; mutant has increased aneuploidy tolerance; relocalizes to the cytosol in response to hypoxia	chrIII	186489	190169
2				22	117	93	90
1	YCR034W	ELO2	1044	2735	476	549	391	Fatty acid elongase, involved in sphingolipid biosynthesis; acts on fatty acids of up to 24 carbons in length; mutations have regulatory effects on 1,3-beta-glucan synthase, vacuolar ATPase, and the secretory pathway; ELO2 has a paralog, ELO1, that arose from the whole genome duplication; lethality of the elo2 elo3 double null mutation is functionally complemented by human ELOVL1 and weakly compl…	chrIII	190592	191635
2				8	16	18	13
1	YCR035C	RRP43	1185	0	12	5	4	Exosome non-catalytic core component; involved in 3'-5' RNA processing and degradation in both the nucleus and the cytoplasm; has similarity to E. coli RNase PH and to human hRrp43p (OIP2, EXOSC8); protein abundance increases in response to DNA replication stress	chrIII	191834	193018
2				0	4	2	1
1	YCR036W	RBK1	1002	2559	1558	1002	1159	Putative ribokinase	chrIII	193297	194298
2				14	37	34	14
1	YCR037C	PHO87	2772	11197	8106	8605	7041	Low-affinity inorganic phosphate (Pi) transporter; acts upstream of Pho81p in regulation of the PHO pathway; expression is independent of Pi concentration and Pho4p activity; contains 12 membrane-spanning segments; PHO87 has a paralog, PHO90, that arose from the whole genome duplication	chrIII	194414	197185
2				29	80	66	50
1	YCR038C	BUD5	1929	13175	6335	7703	4502	GTP/GDP exchange factor for Rsr1p (Bud1p); required for both axial and bipolar budding patterns; mutants exhibit random budding in all cell types	chrIII	197621	199549
2				41	86	88	57
1	YCR038W-A		126	463	188	576	301	Dubious open reading frame; unlikely to encode a functional protein, based on available experimental and comparative sequence data; completely overlaps the verified gene BUD5/YCR038C; identified by homology with hemiascomycetous yeast species	chrIII	199293	199418
2				4	7	8	5
1	YCR039C	MATALPHA2	633	2066	2007	1189	3025	Homeobox-domain protein; with Mcm1p, represses a-specific genes in haploids; acts with A1p to repress transcription of haploid-specific genes in diploids; one of two genes encoded by the MATalpha mating type cassette	chrIII	199546	200178
2				14	35	32	27
1	YCR040W	MATALPHA1	528	320	872	1297	260	Transcriptional co-activator that regulates mating-type-specific genes; targets the transcription factor Mcm1p to the promoters of alpha-specific genes; one of two genes encoded by the MATalpha mating type cassette	chrIII	200442	200969
2				5	17	15	3
1	YCR041W		333	2602	2138	2371	1648	Protein of unknown function; overexpression suppresses the high-frequency loss of mini-chromosomes, probably by increasing the rate of proper chromosome segregation; translated gene product of YCR041W, but not its transcript, is responsible for suppression; suppression ability of YCR041W is completely dependent on silencing protein Sir4p	chrIII	200911	201243
2				12	38	26	15
1	YCR042C	TAF2	4224	3069	393	725	937	TFIID subunit (150 kDa); involved in RNA polymerase II transcription initiation	chrIII	201174	205397
2				4	14	13	8
1	YCR043C		384	1849	1595	2393	962	Putative protein of unknown function; green fluorescent protein (GFP)-fusion protein localizes to the Golgi apparatus; YCR043C is not an essential gene	chrIII	206261	206644
2				11	15	13	12
1	YCR044C	PER1	1074	23	45	20	0	Protein of the endoplasmic reticulum; required for GPI-phospholipase A2 activity that remodels the GPI anchor as a prerequisite for association of GPI-anchored proteins with lipid rafts; functionally complemented by human ortholog PERLD1	chrIII	206877	207950
2				1	3	2	0
1	YCR045C	RRT12	1476	6248	3247	3426	1521	Probable subtilisin-family protease; role in formation of the dityrosine layer of spore walls; localizes to the spore wall and also the nuclear envelope and ER region in mature spores	chrIII	208135	209610
2				19	60	58	25
1	YCR045W-A		351	122	150	972	241	Dubious open reading frame; unlikely to encode a functional protein, based on available experimental and comparative sequence data; completely overlaps with YCR045C; identified by gene-trapping, microarray expression analysis, and genome-wide homology searching	chrIII	208751	209101
2				3	9	14	3
1	YCR046C	IMG1	510	2810	1295	463	283	Mitochondrial ribosomal protein of the large subunit; required for respiration and for maintenance of the mitochondrial genome	chrIII	209914	210423
2				18	10	9	13
1	YCR047C	BUD23	828	114	0	36	114	Methyltransferase that methylates residue G1575 of 18S rRNA; required for rRNA processing and nuclear export of 40S ribosomal subunits independently of methylation activity; diploid mutant displays random budding pattern; functional homolog of human WBSCR22	chrIII	210718	211545
2				2	0	2	1
1	YCR047W-A		207	0	0	2	0	Dubious open reading frame; unlikely to encode a functional protein, based on available experimental and comparative sequence data; completely overlaps with YCR047C; identified by gene-trapping, microarray expression analysis, and genome-wide homology searching	chrIII	211301	211507
2				0	0	1	0
1	YCR048W	ARE1	1833	4286	5318	4756	3006	Acyl-CoA:sterol acyltransferase; endoplasmic reticulum enzyme that contributes the major sterol esterification activity in the absence of oxygen; ARE1 has a paralog, ARE2, that arose from the whole genome duplication	chrIII	211929	213761
2				28	87	67	40
1	YCR049C		447	1302	1955	1877	675	Dubious open reading frame; unlikely to encode a functional protein, based on available experimental and comparative sequence data	chrIII	211871	212317
2				7	27	22	12
1	YCR050C		309	1689	592	804	791	Non-essential protein of unknown function; deletion mutant is synthetically sick or lethal with alpha-synuclein	chrIII	213464	213772
2				9	21	15	10
1	YCR051W		669	4952	9125	5300	5319	Putative protein of unknown function; green fluorescent protein (GFP)-fusion protein localizes to the cytoplasm and nucleus; contains ankyrin (Ank) repeats; YCR051W is not an essential gene	chrIII	214071	214739
2				13	53	46	20
1	YCR052W	RSC6	1452	30	121	180	15	Component of the RSC chromatin remodeling complex; essential for mitotic growth; RSC6 has a paralog, SNF12, that arose from the whole genome duplication	chrIII	214994	216445
2				1	6	4	2
1	YCR053W	THR4	1545	0	11	10	4	Threonine synthase; conserved protein that catalyzes formation of threonine from O-phosphohomoserine; expression is regulated by the GCN4-mediated general amino acid control pathway	chrIII	216697	218241
2				0	1	2	1
1	YCR054C	CTR86	1692	332	311	189	10	Essential protein of unknown function; with orthologs in Ashbya gossypii and Candida albicans; similar to human ATXN10, mutations in which cause spinocerebellar ataxia type 10; codon usage corresponds to that observed for yeast genes expressed at low levels; relative distribution to the nucleus increases upon DNA replication stress	chrIII	218376	220067
2				6	6	9	1
1	YCR057C	PWP2	2772	0	48	35	663	Conserved 90S pre-ribosomal component; essential for proper endonucleolytic cleavage of the 35 S rRNA precursor at A0, A1, and A2 sites; contains eight WD-repeats; PWP2 deletion leads to defects in cell cycle and bud morphogenesis	chrIII	220457	223228
2				0	4	7	4
1	YCR059C	YIH1	777	2275	2322	2354	2625	Negative regulator of eIF2 kinase Gcn2p; competes with Gcn2p for binding to Gcn1p; may contribute to regulation of translation in response to starvation via regulation of Gcn2p; binds to monomeric actin and to ribosomes and polyribosomes; ortholog of mammalian IMPACT	chrIII	223454	224230
2				22	61	47	21
1	YCR060W	TAH1	336	2139	3033	2269	1212	Component of conserved R2TP complex (Rvb1-Rvb2-Tah1-Pih1); R2TP complex interacts with Hsp90 (Hsp82p and Hsc82p) to mediate assembly of large protein complexes such as box C/D snoRNPs and RNA polymerase II; contains a single TPR domain with at least two TPR motifs; plays a role in determining prion variants	chrIII	224399	224734
2				11	24	16	11
1	YCR061W		1896	62364	30202	36460	16081	Protein of unknown function; green fluorescent protein (GFP)-fusion protein localizes to the cytoplasm in a punctate pattern; induced by treatment with 8-methoxypsoralen and UVA irradiation	chrIII	225563	227458
2				102	206	211	107
1	YCR063W	BUD31	474	28133	22496	15859	20670	Component of the SF3b subcomplex of the U2 snRNP; increases efficiency of first and second step pre-mRNA splicing; diploid mutants display a random budding pattern instead of the wild-type bipolar pattern; facilitates passage through G1/S Start, but is not required for G2/M transition or exit from mitosis	chrIII	228318	228791
2				42	107	103	80
1	YCR064C		411	6144	8819	6436	13787	Dubious open reading frame; unlikely to encode a functional protein, based on available experimental and comparative sequence data; partially overlaps the verified gene BUD31	chrIII	228095	228505
2				25	60	57	46
1	YCR065W	HCM1	1695	2882	3712	3856	4333	Forkhead transcription factor; drives S-phase activation of genes involved in chromosome segregation, spindle dynamics, budding; also activates genes involved in respiration, use of alternative energy sources (like proline), NAD synthesis, oxidative stress resistance; key factor in early adaptation to nutrient deficiency and diauxic shift; suppressor of calmodulin mutants with specific SPB assemb…	chrIII	229310	231004
2				34	81	74	42
1	YCR066W	RAD18	1464	507	1093	1567	876	E3 ubiquitin ligase; forms heterodimer with Rad6p to monoubiquitinate PCNA-K164; heterodimer binds single-stranded DNA and has single-stranded DNA dependent ATPase activity; required for postreplication repair; SUMO-targeted ubiquitin ligase (STUbl) that contains a SUMO-interacting motif (SIM) which stimulates its ubiquitin ligase activity towards the sumoylated form of PCNA	chrIII	231500	232963
2				11	37	41	17
1	YCR067C	SED4	3198	5271	4686	3658	3787	Integral ER membrane protein that stimulates Sar1p GTPase activity; involved in COPII vesicle budding through disassociation of coat proteins from membranes onto liposomes; binds Sec16p; SED4 has a paralog, SEC12, that arose from the whole genome duplication	chrIII	233125	236322
2				30	82	72	49
1	YCR068W	ATG15	1563	10981	13074	13506	10270	Phospholipase; preferentially hydrolyses phosphatidylserine, with minor activity against cardiolipin and phosphatidylethanolamine; required for lysis of autophagic and CVT bodies; targeted to intravacuolar vesicles during autophagy via the multivesicular body (MVB) pathway; required for the maintenance of lipid droplet quantity after the diauxic shift; regulates lipolysis; expression regulated by…	chrIII	237214	238776
2				22	62	60	42
1	YCR069W	CPR4	957	5865	2553	4499	1677	Peptidyl-prolyl cis-trans isomerase (cyclophilin); catalyzes the cis-trans isomerization of peptide bonds N-terminal to proline residues; has a potential role in the secretory pathway; CPR4 has a paralog, CPR8, that arose from the whole genome duplication	chrIII	239055	240011
2				14	40	49	26
1	YCR071C	IMG2	441	335	7	0	23	Mitochondrial ribosomal protein of the large subunit; conserved in metazoa, with similarity to human mitochondrial ribosomal protein MRPL49	chrIII	240103	240543
2				7	1	0	3
1	YCR072C	RSA4	1548	0	0	1	0	WD-repeat protein involved in ribosome biogenesis; may interact with ribosomes; required for maturation and efficient intra-nuclear transport or pre-60S ribosomal subunits, localizes to the nucleolus	chrIII	240805	242352
2				0	0	1	0
1	YCR073C	SSK22	3996	23665	12530	6412	4908	MAP kinase kinase kinase of HOG1 mitogen-activated signaling pathway; functionally redundant with Ssk2p; interacts with and is activated by Ssk1p; phosphorylates Pbs2p; SSK22 has a paralog, SSK2, that arose from the whole genome duplication	chrIII	242588	246583
2				57	126	127	73
1	YCR073W-A	SOL2	948	7718	5794	7859	4862	Protein with a possible role in tRNA export; shows similarity to 6-phosphogluconolactonase non-catalytic domains but does not exhibit this enzymatic activity; homologous to Sol3p and Sol4p; SOL2 has a paralog, SOL1, that arose from the whole genome duplication	chrIII	246963	247910
2				25	63	54	30
1	YCR075C	ERS1	783	3610	1766	661	704	Protein involved in cystine transport; localizes to the vacuole, plasma membrane and endosome; similarity to human cystinosin, a H(+)-driven transporter involved in L-cystine export from lysosomes and implicated in the disease cystinosis; contains seven transmembrane domains; mutation is functionally complemented by human CTNS	chrIII	248033	248815
2				8	50	26	16
1	YCR075W-A	EGO2	228	540	80	9	0	Component of the EGO and GSE complexes; identified by homology to Ashbya gossypii; YCR075W-A has a paralog, YNR034W-A, that arose from the whole genome duplication	chrIII	248975	249202
2				2	2	2	0
1	YCR076C	FUB1	753	3408	1380	1609	764	Proteasome-binding protein; interacts physically with multiple subunits of the 20S proteasome and genetically with genes encoding 20S core particle and 19S regulatory particle subunits; exhibits boundary activity which blocks the propagation of heterochromatic silencing; contains a PI31 proteasome regulator domain and sequence similarity with human PSMF1, a proteasome inhibitor; not an essential …	chrIII	249293	250045
2				9	28	26	11
1	YCR077C	PAT1	2391	201	148	56	36	Deadenylation-dependent mRNA-decapping factor; also required for faithful chromosome transmission, maintenance of rDNA locus stability, and protection of mRNA 3'-UTRs from trimming; associated with topoisomerase II; binds to mRNAs under glucose starvation, most often in the 3' UTR; functionally linked to Pab1p; forms cytoplasmic foci upon DNA replication stress; phosphorylation by PKA inhibits P …	chrIII	250238	252628
2				4	10	7	6
1	YCR079W	PTC6	1329	6160	783	4478	6416	Mitochondrial type 2C protein phosphatase (PP2C); has similarity to mammalian PP1Ks; involved in mitophagy; null mutant is sensitive to rapamycin and has decreased phosphorylation of the Pda1 subunit of pyruvate dehydrogenase	chrIII	252845	254173
2				27	37	50	32
1	YCR081C-A		237	10	1567	13976	11857	Dubious open reading frame; unlikely to encode a functional protein, based on available experimental and comparative sequence data; completely overlaps with SRB8/YCR081W; identified by gene-trapping, microarray expression analysis, and genome-wide homology searching	chrIII	258415	258651
2				3	18	24	15
1	YCR081W	SRB8	4284	69	7117	46831	106707	Subunit of the RNA polymerase II mediator complex; associates with core polymerase subunits to form the RNA polymerase II holoenzyme; essential for transcriptional regulation; involved in glucose repression	chrIII	254371	258654
2				9	123	143	99
1	YCR082W	AHC2	387	701	1650	1122	2700	Component of the ADA histone acetyltransferase complex; Ahc2p and Ahc1p are unique to the ADA complex and not shared with the related SAGA and SLIK complexes; may tether Ahc1p to the complex	chrIII	258883	259269
2				6	18	16	10
1	YCR083W	TRX3	384	27	1124	784	1492	Mitochondrial thioredoxin; highly conserved oxidoreductase required to maintain the redox homeostasis of the cell, forms the mitochondrial thioredoxin system with Trr2p, redox state is maintained by both Trr2p and Glr1p	chrIII	259578	259961
2				2	13	14	13
1	YCR084C	TUP1	2142	12	41	76	269	General repressor of transcription; forms complex with Cyc8p, involved in the establishment of repressive chromatin structure through interactions with histones H3 and H4, appears to enhance expression of some genes	chrIII	260311	262452
2				1	10	14	16
1	YCR085W		354	10459	13849	11729	6411	Putative protein of unknown function; conserved among S. cerevisiae strains; YCR085W is not an essential gene	chrIII	262916	263269
2				26	39	40	25
1	YCR086W	CSM1	573	597	1050	429	119	Nucleolar protein that mediates homolog segregation during meiosis I; forms a complex with Lrs4p and then Mam1p at kinetochores; required for condensin recruitment to the replication fork barrier site and rDNA repeat segregation	chrIII	263392	263964
2				8	24	17	10
1	YCR087C-A		462	19160	4028	3408	1541	Putative protein of unknown function; green fluorescent protein (GFP)-fusion protein localizes to the nucleolus; YCR087C-A is not an essential gene	chrIII	264006	264467
2				17	28	30	16
1	YCR087W		516	25777	4514	4408	2899	Dubious open reading frame; unlikely to encode a functional protein, based on available experimental and comparative sequence data; partially overlaps uncharacterized gene YCR087C-A; YCR087W is not an essential gene	chrIII	263976	264491
2				23	36	38	20
1	YCR088W	ABP1	1779	339	1371	2292	1925	Actin-binding protein of the cortical actin cytoskeleton; important for activation of the Arp2/3 complex that plays a key role actin in cytoskeleton organization; inhibits barbed-end actin filament elongation; phosphorylation within its Proline-Rich Regio, mediated by Cdc28p and Pho85p, protects Abp1p from proteolysis mediated by its own PEST sequences; mammalian homolog of HIP-55 (hematopoietic …	chrIII	265068	266846
2				12	36	43	27
1	YCR089W	FIG2	4830	13773	15237	13085	9689	Cell wall adhesin, expressed specifically during mating; may be involved in maintenance of cell wall integrity during mating; FIG2 has a paralog, AGA1, that arose from the whole genome duplication	chrIII	267434	272263
2				52	153	138	97
1	YCR090C		549	588	1916	936	1052	Putative protein of unknown function; green fluorescent protein (GFP)-fusion protein localizes to the cytoplasm and nucleus; YCR090C is not an essential gene	chrIII	272315	272863
2				4	26	19	7
1	YCR091W	KIN82	2163	12737	10310	9621	6512	Putative serine/threonine protein kinase; implicated in the regulation of phospholipid asymmetry through the activation of phospholipid translocases (flippases); involved in the phosphorylation of upstream inhibitory kinase Ypk1p along with Fpk1p; has a redundant role in the cellular response to mating pheromone; KIN82 has a paralog, FPK1, that arose from the whole genome duplication	chrIII	274404	276566
2				25	74	66	34
1	YCR092C	MSH3	3057	4283	6752	5270	4599	Mismatch repair protein; forms dimers with Msh2p that mediate repair of insertion or deletion mutations and removal of nonhomologous DNA ends, contains a PCNA (Pol30p) binding motif required for genome stability	chrIII	276764	279820
2				28	86	86	48
1	YCR093W	CDC39	6327	441	149	69	358	Subunit of the CCR4-NOT1 core complex; this complex has multiple roles in the regulation of mRNA levels including regulation of transcription and destabilization of mRNA by deadenylation; basal transcription factor that increases initiation and elongation; activates the ATPase activity of Dhh1p, resulting in processing body disassembly	chrIII	280117	286443
2				2	7	12	6
1	YCR094W	CDC50	1176	375	149	328	109	Endosomal protein that interacts with phospholipid flippase Drs2p; interaction with Cdc50p is essential for Drs2p catalytic activity; mutations affect cell polarity and polarized growth; similar to Lem3p; CDC50 has a paralog, YNR048W, that arose from the whole genome duplication	chrIII	286762	287937
2				7	10	7	4
1	YCR095C	OCA4	1089	0	21	8	0	Cytoplasmic protein required for replication of Brome mosaic virus; S. cerevisiae is a model system for studying replication of positive-strand RNA viruses in their natural hosts	chrIII	288170	289258
2				0	5	4	0
1	YCR095W-A		159	685	1010	698	526	Putative protein of unknown function	chrIII	289639	289797
2				8	18	11	10
1	YCR096C	HMRA2	360	1815	1206	743	1152	Silenced copy of a2 at HMR; similarity to Alpha2p; required along with a1p for inhibiting expression of the HO endonuclease in a/alpha HO/HO diploid cells with an active mating-type interconversion system	chrIII	293179	293538
2				12	22	20	13
1	YCR097W	HMRA1	487	2684	1330	1655	365	Silenced copy of a1 at HMR; homeobox corepressor that interacts with Alpha2p to repress haploid-specific gene transcription in diploid cells	chrIII	293835	294321
2				10	22	17	9
3				590	1530	992	1195
4				4	14	12	7
1	YCR097W-A		267	175	1474	857	1385	Dubious open reading frame; unlikely to encode a functional protein, based on available experimental and comparative sequence data; identified by homology to a hemiascomycetous yeast protein	chrIII	294439	294705
2				5	22	17	7
1	YCR098C	GIT1	1557	3656	2199	2535	1226	Plasma membrane permease; mediates uptake of glycerophosphoinositol and glycerophosphocholine as sources of the nutrients inositol and phosphate; expression and transport rate are regulated by phosphate and inositol availability	chrIII	297049	298605
2				15	46	44	23
1	YCR099C		468	598	641	575	253	Putative protein of unknown function	chrIII	300832	301299
2				4	8	11	3
1	YCR100C		951	11	756	1206	701	Putative protein of unknown function	chrIII	301271	302221
2				1	20	14	12
1	YCR101C		549	711	2088	616	1231	Putative protein of unknown function; localizes to the membrane fraction; YCR101C is not an essential gene	chrIII	302482	303030
2				6	19	17	9
1	YCR102C		1107	920	1623	1697	355	Putative protein of unknown function; involved in copper metabolism; similar to C. carbonum toxD gene; member of the quinone oxidoreductase family	chrIII	304361	305467
2				10	20	26	10
1	YCR102W-A		198	902	224	467	259	Dubious open reading frame; unlikely to encode a functional protein, based on available experimental and comparative sequence data	chrIII	306735	306932
2				1	4	3	2
1	YCR104W	PAU3	375	1929	1793	1541	1302	Member of the seripauperin multigene family; encoded mainly in subtelomeric region; active during alcoholic fermentation; regulated by anaerobiosis; negatively regulated by oxygen; repressed by heme	chrIII	307801	308175
2				7	25	23	11
1	YCR105W	ADH7	1086	4328	7053	6034	5623	NADPH-dependent medium chain alcohol dehydrogenase; has broad substrate specificity; member of the cinnamyl family of alcohol dehydrogenases; may be involved in fusel alcohol synthesis or in aldehyde tolerance	chrIII	309070	310155
2				26	67	80	46
1	YCR106W	RDS1	2499	4404	8703	4462	7476	Putative zinc cluster transcription factor; involved in conferring resistance to cycloheximide	chrIII	310958	313456
2				22	76	57	48
1	YCR107W	AAD3	1092	2719	3133	3987	2048	Putative aryl-alcohol dehydrogenase; similar to P. chrysosporium aryl-alcohol dehydrogenase; mutational analysis has not yet revealed a physiological role; AAD3 has a paralog, AAD15, that arose from a segmental duplication; members of the AAD gene family comprise three pairs (AAD3 + AAD15, AAD6/AAD16 + AAD4, AAD10 + AAD14) whose two genes are more related to one another than to other members of t…	chrIII	313890	314981
2				11	29	38	19
1	YCR108C		192	136250	220958	160950	143257	Putative protein of unknown function; identified by fungal homology and RT-PCR	chrIII	315997	316188
2				47	86	84	59
1	YDL001W	RMD1	1293	3845	858	1790	1653	Cytoplasmic protein required for sporulation	chrIV	447984	449276
2				6	28	41	12
1	YDL002C	NHP10	612	500	524	726	478	Non-essential INO80 chromatin remodeling complex subunit; preferentially binds DNA ends, protecting them from exonucleatic cleavage; deletion affects telomere maintenance via recombination; related to mammalian high mobility group proteins	chrIV	446967	447578
2				11	21	15	14
1	YDL003W	MCD1	1701	0	289	58	0	Essential alpha-kleisin subunit of the cohesin complex; required for sister chromatid cohesion in mitosis and meiosis; apoptosis induces cleavage and translocation of a C-terminal fragment to mitochondria; expression peaks in S phase	chrIV	444683	446383
2				0	5	3	0
1	YDL004W	ATP16	483	51	0	0	1	Delta subunit of the central stalk of mitochondrial F1F0 ATP synthase; F1F0 ATP synthase is a large, evolutionarily conserved enzyme complex required for ATP synthesis; F1 translationally regulates ATP6 and ATP8 expression to achieve a balanced output of ATP synthase genes encoded in nucleus and mitochondria; phosphorylated	chrIV	443029	443511
2				2	0	0	1
1	YDL005C	MED2	1296	77	335	1754	122	Subunit of the RNA polymerase II mediator complex; associates with core polymerase subunits to form the RNA polymerase II holoenzyme; essential for transcriptional regulation; relocalizes to the cytosol in response to hypoxia	chrIV	441014	442309
2				3	23	26	8
1	YDL006W	PTC1	846	0	26	0	0	Type 2C protein phosphatase (PP2C); dephosphorylates Hog1p, inactivating osmosensing MAPK cascade; involved in Fus3p activation during pheromone response; deletion affects precursor tRNA splicing, mitochondrial inheritance, and sporulation	chrIV	439909	440754
2				0	3	0	0
1	YDL007C-A		258	592	523	325	703	Putative protein of unknown function	chrIV	436567	436824
2				5	11	9	5
1	YDL007W	RPT2	1314	28	11	134	11	ATPase of the 19S regulatory particle of the 26S proteasome; one of six ATPases of the regulatory particle; involved in the degradation of ubiquitinated substrates; required for normal peptide hydrolysis by the core 20S particle; N-myristoylation of Rpt2p at Gly2 is involved in regulating the proper intracellular distribution of proteasome activity by controlling the nuclear localization of the 2…	chrIV	438047	439360
2				1	4	1	2
1	YDL008W	APC11	498	1618	371	288	69	Catalytic core subunit, Anaphase-Promoting Complex/Cyclosome (APC/C); which is a ubiquitin-protein ligase required for degradation of anaphase inhibitors, including mitotic cyclins, during the metaphase/anaphase transition; contains a RING-H2 domain that is required for activity	chrIV	433497	433994
2				2	5	5	1
1	YDL009C		324	198	72	104	29	Protein of unknown function; mRNA identified as translated by ribosome profiling data; SWAT-GFP and mCherry fusion proteins localize to the cytosol; partially overlaps the verified ORF YDL010W; YDL009C is not an essential gene	chrIV	432925	433248
2				1	3	6	2
1	YDL010W	GRX6	696	319	816	863	573	Cis-golgi localized monothiol glutaredoxin, binds Fe-S cluster; more similar in activity to dithiol than other monothiol glutaredoxins; involved in the oxidative stress response; GRX6 has a paralog, GRX7, that arose from the whole genome duplication	chrIV	432330	433025
2				4	21	20	3
1	YDL011C		324	239	530	657	573	Dubious open reading frame; unlikely to encode a functional protein, based on available experimental and comparative sequence data; overlaps the uncharacterized ORF YDL010W	chrIV	432308	432631
2				3	14	10	3
1	YDL012C		410	1596	775	547	981	Tail-anchored plasma membrane protein with a conserved CYSTM module; possibly involved in response to stress; may contribute to non-homologous end-joining (NHEJ) based on ydl012c htz1 double null phenotype; YDL012C has a paralog, YBR016W, that arose from the whole genome duplication	chrIV	431108	431517
2				2	12	11	6
3				242	28	58	39
4				1	4	4	3
1	YDL013W	SLX5	1860	455	643	1522	718	Subunit of the Slx5-Slx8 SUMO-targeted Ub ligase (STUbL) complex; role in Ub-mediated degradation of histone variant Cse4p preventing mislocalization to euchromatin; role in proteolysis of spindle positioning protein Kar9p, and DNA repair proteins Rad52p and Rad57p; forms SUMO-dependent nuclear foci, including DNA repair centers; contains a RING domain and two SIM motifs; associates with the cent…	chrIV	429067	430926
2				15	25	28	6
1	YDL014W	NOP1	984	62	138	22	0	Histone glutamine methyltransferase, modifies H2A at Q105 in nucleolus; component of the small subunit processome complex, which is required for processing of pre-18S rRNA; ortholog of mammalian fibrillarin; inviability of the null mutant is functionally complemented by human FBL	chrIV	427364	428347
2				1	1	2	0
1	YDL015C	TSC13	933	0	0	0	0	Enoyl reductase; catalyzes last step in each cycle of very long chain fatty acid elongation; localizes to ER, highly enriched in a structure marking nuclear-vacuolar junctions; coimmunoprecipitates with elongases Elo2p and Elo3p; protein increases in abundance and relative distribution to ER foci increases upon DNA replication stress; human homolog TECR implicated in nonsyndromic mental retardati…	chrIV	426002	426934
2				0	0	0	0
1	YDL016C		303	386	534	678	552	Dubious open reading frame; unlikely to encode a functional protein, based on available experimental and comparative sequence data; partially overlaps the verified ORF CDC7/YDL153C, the catalytic subunit of a complex that regulates DNA replication	chrIV	425570	425872
2				4	8	12	7
1	YDL017W	CDC7	1524	227	449	584	556	DDK (Dbf4-dependent kinase) catalytic subunit; required for origin firing and replication fork progression in mitotic S phase through phosphorylation of Mcm2-7p complexes and Cdc45p; kinase activity correlates with cyclical DBF4 expression; required for pre-meiotic DNA replication, meiotic DSB formation, recruitment of monopolin complex to kinetochores during meiosis I, regulation of meiosis-spec…	chrIV	424209	425732
2				3	6	14	8
1	YDL018C	ERP3	678	4541	1727	1506	349	Protein with similarity to Emp24p and Erv25p; member of the p24 family involved in ER to Golgi transport	chrIV	422833	423510
2				12	17	20	8
1	YDL019C	OSH2	3852	5728	4492	8433	4169	Member of an oxysterol-binding protein family with seven members; in S. cerevisiae, family members have overlapping, redundant functions in sterol metabolism and collectively perform a function essential for viability; contains FFAT motif; interacts with ER anchor Scs2p at patches at the plasma membrane and at the nuclear envelope; regulated by sterol binding; OSH2 has a paralog, SWH1, that arose…	chrIV	417663	421514
2				28	81	89	49
1	YDL020C	RPN4	1596	458	3734	2070	531	Transcription factor that stimulates expression of proteasome genes; Rpn4p levels are in turn regulated by the 26S proteasome in a negative feedback control mechanism; RPN4 is transcriptionally regulated by various stress responses; relative distribution to the nucleus increases upon DNA replication stress	chrIV	415113	416708
2				8	67	35	27
1	YDL021W	GPM2	936	5284	3752	3306	9156	Homolog of Gpm1p phosphoglycerate mutase; converts 3-phosphoglycerate to 2-phosphoglycerate in glycolysis; may be non-functional; GPM2 has a paralog, GPM3, that arose from the whole genome duplication	chrIV	413953	414888
2				21	56	48	39
1	YDL022C-A		249	1364	628	552	136	Protein of unknown function; SWAT-GFP and mCherry fusion proteins localize to the cytosol; partially overlaps the verified gene DIA3; identified by fungal homology and RT-PCR; mRNA identified as translated by ribosome profiling data	chrIV	409808	410056
2				7	8	6	3
1	YDL022W	GPD1	1176	584	1410	3966	273	NAD-dependent glycerol-3-phosphate dehydrogenase; key enzyme of glycerol synthesis, essential for growth under osmotic stress; expression regulated by high-osmolarity glycerol response pathway; protein abundance increases in response to DNA replication stress; constitutively inactivated via phosphorylation by the protein kinases Ypk1p and Ypk2p, dephosphorylation increases catalytic activity; for…	chrIV	411825	413000
2				11	45	49	12
1	YDL023C		321	1740	3647	5657	534	Dubious open reading frame; unlikely to encode a functional protein, based on available experimental and comparative sequence data; not conserved in other Saccharomyces species; overlaps the verified gene GPD1; deletion confers sensitivity to GSAO; deletion in cyr1 mutant results in loss of stress resistance	chrIV	411761	412081
2				6	27	32	6
1	YDL024C	DIA3	1407	5696	5661	8174	5770	Protein of unknown function; involved in invasive and pseudohyphal growth	chrIV	408451	409857
2				31	65	68	58
1	YDL025C	RTK1	1863	1995	5138	4764	4654	Putative protein kinase, potentially phosphorylated by Cdc28p; interacts with ribosome biogenesis factors, Cka2, Gus1 and Arc1; protein abundance increases in response to DNA replication stress	chrIV	405344	407206
2				28	70	58	36
1	YDL025W-A		105	0	151	14	0	Dubious open reading frame; unlikely to encode a functional protein, based on available experimental and comparative sequence data; completely overlaps the ORF YDL025C; identified by gene-trapping, microarray expression analysis, and genome-wide homology searching	chrIV	405410	405514
2				0	2	1	0
1	YDL026W		312	3440	2566	2745	1289	Dubious open reading frame; unlikely to encode a functional protein, based on available experimental and comparative sequence data	chrIV	404749	405060
2				9	21	22	9
1	YDL027C	MRX9	1263	2808	1728	1256	971	Protein that associates with mitochondrial ribosome; the authentic, non-tagged protein is detected in highly purified mitochondria in high-throughput studies; YDL027C is not an essential gene	chrIV	403695	404957
2				9	27	22	8
1	YDL028C	MPS1	2295	0	0	3	0	Dual-specificity kinase; autophosphorylation required for function; required for spindle pole body (SPB) duplication and spindle checkpoint function; contributes to bi-orientation by promoting formation of force-generating kinetochore-microtubule attachments in meiosis I; substrates include SPB proteins Spc42p, Spc110p, and Spc98p, mitotic exit network protein Mob1p, kinetochore protein Cnn1p, an…	chrIV	400997	403291
2				0	0	2	0
1	YDL029W	ARP2	1299	0	4	2	5	Essential component of the Arp2/3 complex; Arp2/3 is a highly conserved actin nucleation center required for the motility and integrity of actin patches; involved in endocytosis and membrane growth and polarity; required for efficient Golgi-to-ER trafficking in COPI mutants	chrIV	399340	400638
2				0	2	1	1
3				0	4	0	0
4				0	1	0	0
1	YDL030W	PRP9	1593	0	616	79	7	Subunit of the SF3a splicing factor complex; required for spliceosome assembly; acts after the formation of the U1 snRNP-pre-mRNA complex	chrIV	397537	399129
2				0	3	3	1
1	YDL031W	DBP10	2988	0	4	65	7	Putative ATP-dependent RNA helicase of the DEAD-box protein family; constituent of 66S pre-ribosomal particles; essential protein involved in ribosome biogenesis	chrIV	394217	397204
2				0	3	2	3
1	YDL032W		312	332	609	0	142	Dubious open reading frame; unlikely to encode a functional protein, based on available experimental and comparative sequence data; partially overlaps verified gene SLM3/YDL033C; YDL032W is not an essential gene	chrIV	393690	394001
2				8	17	0	4
1	YDL033C	SLM3	1254	1842	3053	880	799	tRNA-specific 2-thiouridylase; responsible for 2-thiolation of the wobble base of mitochondrial tRNAs; human homolog TRMU is implicated in myoclonus epilepsy associated with ragged red fibers (MERRF), and can complement yeast null mutant	chrIV	392659	393912
2				31	89	13	22
1	YDL034W		345	79	79	255	85	Dubious open reading frame; unlikely to encode a functional protein, based on available experimental and comparative sequence data; partially overlaps with verified gene GPR1/YDL035C; YDL034W is not an essential gene	chrIV	391783	392127
2				2	5	8	4
1	YDL035C	GPR1	2886	4381	4311	4874	3280	Plasma membrane G protein coupled receptor (GPCR); interacts with the heterotrimeric G protein alpha subunit, Gpa2p, and with Plc1p; sensor that integrates nutritional signals with the modulation of cell fate via PKA and cAMP synthesis	chrIV	389172	392057
2				26	70	79	37
1	YDL036C	PUS9	1389	3764	4241	2632	1421	Mitochondrial tRNA:pseudouridine synthase; catalyzes the formation of pseudouridine at position 32 in mitochondrial tRNAs; contains an N-terminal mitochondrial targeting sequence; PUS9 has a paralog, RIB2, that arose from the whole genome duplication	chrIV	387513	388901
2				19	48	42	16
1	YDL037C	BSC1	987	705	1725	2893	1424	Protein of unconfirmed function; similar to cell surface flocculin Flo11p; ORF exhibits genomic organization compatible with a translational readthrough-dependent mode of expression; in W303 strain one continuous open reading frame comprising of YDL037C, the intergenic region and YDL039C encodes the gene IMI1	chrIV	384601	385587
2				20	33	30	13
1	YDL039C	PRM7	2097	1416	9542	7723	1657	Pheromone-regulated protein; predicted to have one transmembrane segment; promoter contains Gcn4p binding elements; in W303 strain one continuous open reading frame comprising of YDL037C, the intergenic region and YDL039C encodes the IMI1	chrIV	381985	384081
2				14	94	74	34
1	YDL040C	NAT1	2565	119	1052	654	1614	Subunit of protein N-terminal acetyltransferase NatA; NatA comprised of Nat1p, Ard1p, and Nat5p; N-terminally acetylates many proteins to influence multiple processes such as cell cycle progression, heat-shock resistance, mating, sporulation, telomeric silencing and early stages of mitophagy; orthologous to human NAA15; expression of both human NAA10 and NAA15 functionally complements ard1 nat1 d…	chrIV	378874	381438
2				4	20	21	22
1	YDL041W		354	22	573	1771	833	Dubious open reading frame; unlikely to encode a functional protein, based on available experimental and comparative sequence data; overlaps the verified gene SIR2/YDL042C	chrIV	378102	378455
2				2	20	23	13
1	YDL042C	SIR2	1689	494	3733	10687	4648	Conserved NAD+ dependent histone deacetylase of the Sirtuin family; deacetylation targets are primarily nuclear proteins; required for telomere hypercluster formation in quiescent yeast cells; involved in regulation of lifespan; plays roles in silencing at HML, HMR, telomeres, and rDNA; negatively regulates initiation of DNA replication; functions as regulator of autophagy like mammalian homolog …	chrIV	376757	378445
2				14	69	67	38
1	YDL043C	PRP11	801	0	1	0	0	Subunit of the SF3a splicing factor complex; required for spliceosome assembly	chrIV	375680	376480
2				0	1	0	0
1	YDL044C	MTF2	1323	846	10	1	50	Mitochondrial protein that interacts with mitochondrial RNA polymerase; interacts with an N-terminal region of mitochondrial RNA polymerase (Rpo41p) and couples RNA processing and translation to transcription	chrIV	373967	375289
2				9	5	1	8
1	YDL045C	FAD1	921	0	0	30	0	Flavin adenine dinucleotide (FAD) synthetase; performs the second step in synthesis of FAD from riboflavin; mutation is functionally complemented by human FLAD1	chrIV	372688	373608
2				0	0	4	0
1	YDL045W-A	MRP10	288	9	75	0	16	Mitochondrial ribosomal protein of the small subunit; contains twin cysteine-x9-cysteine motifs; oxidized by Mia40p during import into mitochondria	chrIV	372248	372535
2				1	2	0	3
1	YDL046W	NPC2	522	947	2127	4207	1076	Sterol transport protein and functional homolog of human NPC2/He1; human NPC2 is a cholesterol-binding protein whose deficiency causes Niemann-Pick type C2 disease involving retention of cholesterol in lysosomes; yeast NPC2 can complement mutations in human NPC2	chrIV	371240	371761
2				12	28	25	20
1	YDL047W	SIT4	936	1240	249	223	120	Ceramide-activated, type 2A-related serine-threonine phosphatase; functions in G1/S transition of mitotic cycle; controls lifespan, mitochondrial function, cell cycle progression by regulating HXK2 phosphorylation; regulator of COPII coat dephosphorylation; required for ER to Golgi traffic; interacts with Hrr25p kinase; cytoplasmic and nuclear protein that modulates functions mediated by Pkc1p in…	chrIV	369771	370706
2				2	3	4	4
1	YDL048C	STP4	1473	114749	112589	57966	50214	Protein containing a Kruppel-type zinc-finger domain; similar to Stp1p, Stp2p; predicted transcription factor; relative distribution to the nucleus increases upon DNA replication stress; STP4 has a paralog, STP3, that arose from the whole genome duplication	chrIV	366739	368211
2				115	239	200	159
1	YDL049C	KNH1	807	87738	27440	34889	13819	Protein with similarity to Kre9p; Kre9p is involved in cell wall beta 1,6-glucan synthesis; overproduction suppresses growth defects of a kre9 null mutant; required for propionic acid resistance	chrIV	365068	365874
2				102	148	126	78
1	YDL050C		372	1385	4303	2127	605	Dubious open reading frame; unlikely to encode a functional protein, based on available experimental and comparative sequence data	chrIV	364446	364817
2				8	28	23	14
1	YDL051W	LHP1	828	2053	12406	5034	4359	RNA binding protein required for maturation of tRNA and U6 snRNA; acts as a molecular chaperone for RNAs transcribed by polymerase III; homologous to human La (SS-B) autoantigen	chrIV	363952	364779
2				23	71	55	36
1	YDL052C	SLC1	912	9752	4158	7220	2781	1-acyl-sn-glycerol-3-phosphate acyltransferase; catalyzes the acylation of lysophosphatidic acid to form phosphatidic acid, a key intermediate in lipid metabolism; enzymatic activity detected in lipid particles and microsomes	chrIV	362672	363583
2				23	68	61	35
1	YDL053C	PBP4	558	2364	1045	1636	162	Pbp1p binding protein; interacts strongly with Pab1p-binding protein 1 (Pbp1p) in the yeast two-hybrid system; also interacts with Lsm12p in a copurification assay; relative distribution to the nucleus increases upon DNA replication stress	chrIV	361699	362256
2				12	29	20	6
1	YDL054C	MCH1	1461	10362	10300	13120	5182	Protein with similarity to mammalian monocarboxylate permeases; monocarboxylate permeases are involved in transport of monocarboxylic acids across the plasma membrane but mutant is not deficient in monocarboxylate transport	chrIV	359825	361285
2				45	128	125	63
1	YDL055C	PSA1	1086	0	6	4	15	GDP-mannose pyrophosphorylase (mannose-1-phosphate guanyltransferase); synthesizes GDP-mannose from GTP and mannose-1-phosphate in cell wall biosynthesis; required for normal cell wall structure	chrIV	355674	356759
2				0	1	1	2
1	YDL056W	MBP1	2502	1274	1400	1957	1150	Transcription factor; involved in regulation of cell cycle progression from G1 to S phase, forms a complex with Swi6p that binds to MluI cell cycle box regulatory element in promoters of DNA synthesis genes	chrIV	352877	355378
2				8	46	55	31
1	YDL057W		987	2513	2426	6487	1064	Putative protein of unknown function; YDL057W is not an essential gene	chrIV	351434	352420
2				14	44	30	18
1	YDL058W	USO1	5373	177	452	578	243	Essential protein involved in vesicle-mediated ER to Golgi transport; binds membranes and functions during vesicle docking to the Golgi; required for assembly of the ER-to-Golgi SNARE complex	chrIV	345665	351037
2				3	23	22	13
1	YDL059C	RAD59	717	301	1739	2047	1399	Protein involved DNA double-strand break repair; repairs breaks in DNA during vegetative growth via recombination and single-strand annealing; anneals complementary single-stranded DNA; forms nuclear foci upon DNA replication stress; required for loading of Rad52p to DSBs; regulates replication fork progression in DNA ligase I-deficient cells; paralog of Rad52p	chrIV	344237	344953
2				10	36	38	21
1	YDL060W	TSR1	2367	482	669	487	134	Protein required for processing of 20S pre-rRNA in the cytoplasm; associates with pre-40S ribosomal particles; inhibits the premature association of 60S subunits with assembling 40S subunits in the cytoplasm; similar to Bms1p; relocalizes from nucleus to cytoplasm upon DNA replication stress	chrIV	341619	343985
2				1	8	8	2
1	YDL061C	RPS29B	171	1	190	27	0	Protein component of the small (40S) ribosomal subunit; homologous to mammalian ribosomal protein S29 and bacterial S14; RPS29B has a paralog, RPS29A, that arose from the whole genome duplication	chrIV	340628	340798
2				1	8	5	0
1	YDL062W		426	3439	3585	4400	7950	Dubious open reading frame; unlikely to encode a functional protein, based on available experimental and comparative sequence data; partially overlaps uncharacterized ORF YDL063C; YDL062W is not essential	chrIV	339857	340282
2				15	37	24	22
1	YDL063C	SYO1	1863	2714	4455	2948	5349	Transport adaptor or symportin; facilitates synchronized nuclear coimport of the two 5S-rRNA binding proteins Rpl5p and Rpl11p; binds to nascent Rpl5p during translation; required for biogenesis of the large ribosomal subunit; green fluorescent protein (GFP)-fusion protein localizes to the cytoplasm and nucleus	chrIV	338272	340134
2				18	56	48	40
1	YDL064W	UBC9	584	0	3	14	0	SUMO-conjugating enzyme involved in the Smt3p conjugation pathway; nuclear protein required for S- and M-phase cyclin degradation and mitotic control; involved in proteolysis mediated by the anaphase-promoting complex cyclosome (APCC)	chrIV	337487	338070
2				0	1	2	0
3				0	2	3	0
4				0	1	1	0
1	YDL065C	PEX19	1029	1019	1990	1141	364	Chaperone and import receptor for newly-synthesized class I PMPs; binds peroxisomal membrane proteins (PMPs) in the cytoplasm and delivers them to the peroxisome for subsequent insertion into the peroxisomal membrane; interacts with Myo2p and contributes to peroxisome partitioning	chrIV	336249	337277
2				10	20	19	11
1	YDL066W	IDP1	1287	19254	8691	17090	8277	Mitochondrial NADP-specific isocitrate dehydrogenase; catalyzes the oxidation of isocitrate to alpha-ketoglutarate; not required for mitochondrial respiration and may function to divert alpha-ketoglutarate to biosynthetic processes	chrIV	334835	336121
2				45	83	96	44
1	YDL067C	COX9	180	496	7	0	10	Subunit VIIa of cytochrome c oxidase (Complex IV); Complex IV is the terminal member of the mitochondrial inner membrane electron transport chain	chrIV	334217	334396
2				3	4	0	2
1	YDL068W		330	1476	44	213	35	Dubious open reading frame; unlikely to encode a functional protein, based on available experimental and comparative sequence data	chrIV	333500	333829
2				11	6	2	3
1	YDL069C	CBS1	690	8734	135	20	321	Mitochondrial translational activator of the COB mRNA; membrane protein that interacts with translating ribosomes, acts on the COB mRNA 5'-untranslated leader	chrIV	333121	333810
2				15	10	2	9
1	YDL070W	BDF2	1917	3025	7180	6086	7027	Protein involved in transcription initiation; acts at TATA-containing promoters; associates with the basal transcription factor TFIID; contains two bromodomains; corresponds to the C-terminal region of mammalian TAF1; redundant with Bdf1p; protein abundance increases in response to DNA replication stress; BDF2 has a paralog, BDF1, that arose from the whole genome duplication	chrIV	331024	332940
2				31	105	85	63
1	YDL071C		375	8674	12846	9074	9925	Dubious open reading frame; unlikely to encode a functional protein, based on available experimental and comparative sequence data; partially overlaps the verified ORF BDF2/YDL070W	chrIV	330666	331040
2				41	83	78	55
1	YDL072C	YET3	612	389	701	852	172	Protein of unknown function; YET3 null mutant decreases the level of secreted invertase; homolog of human BAP31 protein; protein abundance increases in response to DNA replication stress	chrIV	329836	330447
2				6	11	25	9
1	YDL073W	AHK1	2955	160	1280	3039	2483	Scaffold protein in the HKR1 sub-branch of the Hog1p-signaling pathway; physically interacts with the cytoplasmic domain of Hkr1p, and with Sho1p, Pbs2p, and Ste11p; prevents cross-talk signaling from Hkr1p of the osmotic stress MAPK cascade to the Kss1p MAPK cascade; non-essential gene	chrIV	326613	329567
2				13	62	70	28
1	YDL074C	BRE1	2103	9	26	871	0	E3 ubiquitin ligase; forms heterodimer with Rad6p to regulate K63 polyubiquitination in response to oxidative stress and to monoubiquinate histone H2B-K123, which is required for the subsequent methylation of histone H3-K4 and H3-K79; required for DSBR, transcription, silencing, and checkpoint control; interacts with RNA-binding protein Npl3p, linking histone ubiquitination to mRNA processing; Br…	chrIV	324047	326149
2				1	3	7	0
1	YDL075W	RPL31A	763	25	37	26	139	Ribosomal 60S subunit protein L31A; associates with karyopherin Sxm1p; loss of both Rpl31p and Rpl39p confers lethality; homologous to mammalian ribosomal protein L31, no bacterial homolog; RPL31A has a paralog, RPL31B, that arose from the whole genome duplication	chrIV	322226	322988
2				1	3	2	1
3				0	0	0	0
4				0	0	0	0
1	YDL076C	RXT3	885	186	3319	3841	1809	Component of the Rpd3L histone deacetylase complex; involved in histone deacetylation; protein abundance increases in response to DNA replication stress	chrIV	320668	321552
2				7	80	91	47
1	YDL077C	VAM6	3150	7	188	129	35	Guanine nucleotide exchange factor for the GTPase Gtr1p; subunit of the HOPS endocytic tethering complex; vacuole membrane protein; functions as a Rab GTPase effector, interacting with both GTP- and GDP-bound conformations of Ypt7p; facilitates tethering and promotes membrane fusion events at the late endosome and vacuole; required for both membrane and protein trafficking; component of vacuole-m…	chrIV	316971	320120
2				1	8	6	4
1	YDL078C	MDH3	1032	5070	13291	15342	5422	Peroxisomal malate dehydrogenase; catalyzes interconversion of malate and oxaloacetate; involved in the glyoxylate cycle	chrIV	315357	316388
2				53	137	143	69
1	YDL079C	MRK1	1798	17814	12675	14163	6852	Glycogen synthase kinase 3 (GSK-3) homolog; one of four GSK-3 homologs in S. cerevisiae that function to activate Msn2p-dependent transcription of stress responsive genes and that function in protein degradation; MRK1 has a paralog, RIM11, that arose from the whole genome duplication	chrIV	312951	314748
2				45	118	107	65
3				1555	2259	1600	863
4				8	35	30	13
1	YDL080C	THI3	1830	6489	2050	13015	3943	Regulatory protein that binds Pdc2p and Thi2p transcription factors; activates thiamine biosynthesis transcription factors Pdc2p and Thi2p by binding to them, but releases and de-activates them upon binding to thiamine pyrophosphate (TPP), the end product of the pathway; has similarity to decarboxylases but enzymatic activity is not detected	chrIV	310642	312471
2				30	78	75	41
1	YDL081C	RPP1A	321	15	113	69	0	Ribosomal stalk protein P1 alpha; involved in the interaction between translational elongation factors and the ribosome; free (non-ribosomal) P1 stimulates the phosphorylation of the eIF2 alpha subunit (Sui2p) by Gcn2p; accumulation of P1 in the cytoplasm is regulated by phosphorylation and interaction with the P2 stalk component	chrIV	309802	310122
2				2	8	7	0
1	YDL082W	RPL13A	965	869	1729	1170	5125	Ribosomal 60S subunit protein L13A; not essential for viability; homologous to mammalian ribosomal protein L13, no bacterial homolog; RPL13A has a paralog, RPL13B, that arose from the whole genome duplication	chrIV	308424	309388
2				4	23	23	18
3				12778	8173	7014	6583
4				11	28	21	18
1	YDL083C	RPS16B	864	264	463	228	88	Protein component of the small (40S) ribosomal subunit; homologous to mammalian ribosomal protein S16 and bacterial S9; RPS16B has a paralog, RPS16A, that arose from the whole genome duplication	chrIV	306926	307789
2				7	17	12	8
3				11	149	44	105
4				1	13	11	5
1	YDL084W	SUB2	1341	0	0	0	1	Component of the TREX complex required for nuclear mRNA export; member of the DEAD-box RNA helicase superfamily and is involved in early and late steps of spliceosome assembly; homolog of the human splicing factor hUAP56; relocalizes from nucleus to cytoplasm upon DNA replication stress	chrIV	305237	306577
2				0	0	0	1
1	YDL085C-A		207	1451	1847	3415	953	Putative protein of unknown function; green fluorescent protein (GFP)-fusion protein localizes to the cytoplasm and nucleus	chrIV	302464	302670
2				5	18	23	9
1	YDL085W	NDE2	1638	31431	13140	16734	8070	Mitochondrial external NADH dehydrogenase; catalyzes the oxidation of cytosolic NADH; Nde1p and Nde2p are involved in providing the cytosolic NADH to the mitochondrial respiratory chain; NDE2 has a paralog, NDE1, that arose from the whole genome duplication	chrIV	303211	304848
2				42	109	99	62
1	YDL086C-A		435	19440	13372	12902	3508	Dubious open reading frame; unlikely to encode a functional protein, based on available experimental and comparative sequence data; overlaps uncharacterized ORF YDL086W; identified by gene-trapping, microarray expression analysis, and genome-wide homology searching	chrIV	301655	302089
2				29	61	54	31
1	YDL086W		822	21461	16937	13978	4209	Putative carboxymethylenebutenolidase; the authentic, non-tagged protein is detected in highly purified mitochondria in high-throughput studies; YDL086W is not an essential gene	chrIV	301413	302234
2				42	91	76	47
1	YDL087C	LUC7	786	2337	6171	5895	4303	Essential protein associated with the U1 snRNP complex; splicing factor involved in recognition of 5' splice site; contains two zinc finger motifs; N-terminal zinc finger binds pre-mRNA; relocalizes to the cytosol in response to hypoxia	chrIV	300214	300999
2				11	19	17	13
1	YDL088C	ASM4	1587	2638	2871	2514	845	FG-nucleoporin component of central core of nuclear pore complex (NPC); contributes directly to nucleocytoplasmic transport; induces membrane tubulation, which may contribute to nuclear pore assembly; ASM4 has a paralog, NUP53, that arose from the whole genome duplication	chrIV	298417	300003
2				16	42	37	27
1	YDL089W	NUR1	1455	3764	4052	2284	1029	Protein involved in regulation of mitotic exit; dephosphorylation target of Cdc14p in anaphase, which promotes timely rDNA segregation and allows mitotic progression; interacts with Csm1p, Lrs4p; required for rDNA repeat stability; null mutant causes increase in unequal sister-chromatid exchange; GFP-fusion protein localizes to the nuclear periphery, possible Cdc28p substrate	chrIV	296820	298274
2				11	48	36	24
1	YDL090C	RAM1	1296	1677	1547	3475	672	Beta subunit of the CAAX farnesyltransferase (FTase); this complex prenylates the a-factor mating pheromone and Ras proteins; required for the membrane localization of Ras proteins and a-factor; homolog of the mammalian FTase beta subunit	chrIV	295034	296329
2				5	11	11	7
1	YDL091C	UBX3	1368	1453	1668	1139	660	Clathrin-coated vesicle component, regulator of endocytosis; copurifies with the DSC ubiquitin ligase complex; UBX (ubiquitin regulatory X) domain-containing protein that interacts with Cdc48p; required for efficient clathrin-mediated endocytosis; ortholog of fission yeast Ucp10	chrIV	293392	294759
2				14	32	24	11
1	YDL092W	SRP14	441	267	1570	3034	567	Signal recognition particle (SRP) subunit; interacts with the RNA component of SRP to form the Alu domain, which is the region of SRP responsible for arrest of nascent chain elongation during membrane targeting; homolog of mammalian SRP14	chrIV	292781	293221
2				4	12	9	5
1	YDL093W	PMT5	2232	15344	10180	11138	6122	Protein O-mannosyltransferase; transfers mannose residues from dolichyl phosphate-D-mannose to protein serine/threonine residues; acts in a complex with Pmt3p, can instead interact with Pmt2p in some conditions; target for new antifungals	chrIV	289909	292140
2				42	98	88	43
1	YDL094C		510	20575	16965	22682	6995	Dubious open reading frame; unlikely to encode a functional protein, based on available experimental and comparative sequence data; partially overlaps verfied gene PMT5/YDL093W; YDL094C is not essential	chrIV	289572	290081
2				23	62	56	29
1	YDL095W	PMT1	2454	31	1099	478	265	Protein O-mannosyltransferase of the ER membrane; transfers mannose from dolichyl phosphate-D-mannose to protein serine and threonine residues; 1 of 7 related proteins involved in O-glycosylation which is essential for cell wall rigidity; involved in ER quality control; amino terminus faces cytoplasm, carboxyl terminus faces ER lumen	chrIV	287059	289512
2				2	16	21	8
1	YDL096C	OPI6	327	17	52	20	23	Dubious open reading frame; unlikely to encode a functional protein, based on available experimental and comparative sequence data; partially overlaps verified gene PMT1/YDL095W; YDL096C is not essential	chrIV	286998	287324
2				1	1	4	4
1	YDL097C	RPN6	1305	0	7	80	5	Essential, non-ATPase regulatory subunit of the 26S proteasome lid; required for the assembly and activity of the 26S proteasome; the human homolog (S9 protein) partially rescues Rpn6p depletion; protein abundance increases in response to DNA replication stress	chrIV	285391	286695
2				0	1	3	2
1	YDL098C	SNU23	585	457	482	449	803	Component of the U4/U6.U5 snRNP complex; involved in mRNA splicing via spliceosome	chrIV	284581	285165
2				4	6	5	2
1	YDL099W	BUG1	1026	1053	3357	1554	562	Cis-golgi localized protein involved in ER to Golgi transport; forms a complex with the mammalian GRASP65 homolog, Grh1p; mutants are compromised for the fusion of ER-derived vesicles with Golgi membranes	chrIV	283419	284444
2				8	32	24	13
1	YDL100C	GET3	1065	25	223	51	49	Guanine nucleotide exchange factor for Gpa1p; amplifies G protein signaling; functions as a chaperone under ATP-depleted oxidative stress conditions; subunit of GET complex, involved in ATP dependent Golgi to ER trafficking and insertion of tail-anchored (TA) proteins into ER membrane under non-stress conditions; binds as dimer to transmembrane domain (TMD) cargo, shielding TMDs from aqueous solv…	chrIV	282112	283176
2				1	13	11	4
1	YDL101C	DUN1	1542	659	920	452	442	Cell-cycle checkpoint S/T protein kinase; required for transient G2/M arrest after DNA damage, damage-induced transcription, and nuclear-to-cytoplasmic redistribution of Rnr2p-Rnr4p after genotoxic stress and iron deprivation; phosphorylates repair protein Rad55p, transcriptional repressor Sml1p, superoxide dismutase, and ribonucleotide reductase inhibitors Crt1p and Dif1p; functions in the Mec1p…	chrIV	280307	281848
2				9	25	12	8
1	YDL102W	POL3	3294	0	6	22	8	Catalytic subunit of DNA polymerase delta; required for chromosomal DNA replication during mitosis and meiosis, intragenic recombination, repair of double strand DNA breaks, and DNA replication during nucleotide excision repair (NER)	chrIV	276872	280165
2				0	2	6	2
1	YDL103C	QRI1	1434	0	828	0	0	UDP-N-acetylglucosamine pyrophosphorylase; catalyzes the formation of UDP-N-acetylglucosamine (UDP-GlcNAc), which is important in cell wall biosynthesis, protein N-glycosylation, and GPI anchor biosynthesis; protein abundance increases in response to DNA replication stress	chrIV	275148	276581
2				0	3	0	0
1	YDL104C	QRI7	1224	2648	1626	229	832	Protein involved in threonylcarbamoyl adenosine biosynthesis; Sua5p and Qri7p are necessary and sufficient for RNA t6A modification in vitro; highly conserved mitochondrial protein; essential for t6A modification of mitochondrial tRNAs that decode ANN codons; similar to Kae1p and E. coli YgjD, both of which are also required for tRNA t6A modification; when directed to the cytoplasm, complements t…	chrIV	273653	274876
2				15	39	20	14
1	YDL105W	NSE4	1209	0	146	20	0	Component of the SMC5-SMC6 complex; this complex plays a key role in the removal of X-shaped DNA structures that arise between sister chromatids during DNA replication and repair	chrIV	272389	273597
2				0	3	3	0
1	YDL106C	PHO2	1680	55	753	589	444	Homeobox transcription factor; regulatory targets include genes involved in phosphate metabolism; binds cooperatively with Pho4p to the PHO5 promoter; phosphorylation of Pho2p facilitates interaction with Pho4p; relocalizes to the cytosol in response to hypoxia	chrIV	270222	271901
2				2	23	20	11
1	YDL107W	MSS2	1056	6306	247	0	105	Peripherally bound inner membrane protein of the mitochondrial matrix; involved in membrane insertion of C-terminus of Cox2p, interacts genetically and physically with Cox18p	chrIV	268921	269976
2				32	15	0	6
1	YDL108W	KIN28	1002	45	6	200	38	Serine/threonine protein kinase, subunit of transcription factor TFIIH; involved in transcription initiation at RNA polymerase II promoters; phosphorylates Ser5 residue of the PolII C-terminal domain (CTD) at gene promoters; relocalizes to the cytosol in response to hypoxia	chrIV	267698	268699
2				2	2	7	3
3				0	0	0	0
4				0	0	0	0
1	YDL109C		1944	2206	3317	3201	2828	Putative lipase; involved in lipid metabolism; not an essential gene; YDL109C has a paralog, ROG1, that arose from the whole genome duplication	chrIV	265258	267201
2				16	59	45	26
1	YDL110C	TMA17	453	4555	3096	5082	1497	ATPase dedicated chaperone that adapts proteasome assembly to stress; Tma17p is induced upon stress; interacts with Rpt6p to assist its pairing to Rpt3p and early steps in proteasome biogenesis; associates with ribosomes; heterozygous deletion demonstrated increases in chromosome instability in a rad9 deletion background; protein abundance is decreased upon intracellular iron depletion	chrIV	264512	264964
2				22	59	39	24
1	YDL111C	RRP42	798	0	2	0	14	Exosome non-catalytic core component; involved in 3'-5' RNA processing and degradation in both the nucleus and the cytoplasm; has similarity to E. coli RNase PH and to human hRrp42p (EXOSC7)	chrIV	263313	264110
2				0	1	0	2
1	YDL112W	TRM3	4311	25453	7629	5577	6972	2'-O-ribose methyltransferase; catalyzes the ribose methylation of the guanosine nucleotide at position 18 of tRNAs	chrIV	258915	263225
2				43	124	101	84
1	YDL113C	ATG20	1923	746	3543	2182	2688	Sorting nexin family member; required for the cytoplasm-to-vacuole targeting (Cvt) pathway and for endosomal sorting; has a Phox homology domain that binds phosphatidylinositol-3-phosphate; interacts with Snx4p; potential Cdc28p substrate	chrIV	256633	258555
2				14	53	41	25
1	YDL114W		927	584	1628	4612	1920	Putative short-chain dehydrogenase/reductase; YDL114W is not an essential gene	chrIV	255604	256530
2				11	32	35	22
1	YDL114W-A		114	0	0	0	0	Dubious open reading frame; unlikely to encode a functional protein, based on available experimental and comparative sequence data; identified based on homology to hemiascomycetous yeasts	chrIV	254935	255048
2				0	0	0	0
1	YDL115C	IWR1	1132	7990	4670	1962	4581	RNA polymerase II transport factor, conserved from yeast to humans; also has a role in transporting RNA polymerase III into the nucleus; interacts with most of the RNAP II subunits; nucleo-cytoplasmic shuttling protein; deletion causes hypersensitivity to K1 killer toxin; protein increases in abundance and relocalizes from nucleus to cytoplasm upon DNA replication stress	chrIV	253995	255126
2				12	22	20	18
3				0	0	0	0
4				0	0	0	0
1	YDL116W	NUP84	2181	0	217	80	27	Subunit of the Nup84p subcomplex of the nuclear pore complex (NPC); contributes to nucleocytoplasmic transport and NPC biogenesis; also plays roles in several processes that may require localization of genes or chromosomes at the nuclear periphery, including double-strand break repair, transcription and chromatin silencing; homologous to human NUP107	chrIV	251566	253746
2				0	18	10	3
1	YDL117W	CYK3	2658	9150	14207	15214	13891	SH3-domain protein located in the bud neck and cytokinetic actin ring; relocalizes from bud neck to nucleus upon DNA replication stress; activates the chitin synthase activity of Chs2p during cytokinesis; suppressor of growth and cytokinesis defects of chs2 phospho-mutants	chrIV	248581	251238
2				30	103	94	75
1	YDL118W		381	1439	2865	622	117	Dubious open reading frame, unlikely to encode a protein; overlaps almost completely with YDL119C; mutations that would affect both YDL118W and YDL119C confer defective telomere maintenance and are synthetically sick or lethal with alpha-synuclein	chrIV	247302	247682
2				10	14	13	4
1	YDL119C	HEM25	924	2310	6063	12567	283	Mitochondrial glycine transporter; required for the transport of glycine into mitochondria for initiation of heme biosynthesis, with YMC1 acting as a secondary transporter; homolog of human SLC25A38, a mitochondrial glycine transporter associated with nonsyndromic autosomal recessive congenital sideroblastic anemia; human SLC25A38 can complement the heme deficiency associated with the null mutant…	chrIV	246689	247612
2				27	56	47	16
1	YDL120W	YFH1	525	171	9	0	0	Mitochondrial matrix iron chaperone; oxidizes and stores iron; interacts with Isu1p to promote Fe-S cluster assembly; mutation results in multiple Fe/S-dependent enzyme deficiencies; human frataxin homolog FXN is mutated in Friedrich's ataxia; human FTL gene can complement yeast yfh1 null mutant	chrIV	245923	246447
2				2	2	0	0
1	YDL121C		450	5653	3457	4287	4690	Putative protein of unknown function; green fluorescent protein (GFP)-fusion protein localizes to the endoplasmic reticulum; YDL121C is not an essential protein	chrIV	245133	245582
2				10	23	24	18
1	YDL122W	UBP1	2430	3526	3947	4340	2708	Ubiquitin-specific protease; removes ubiquitin from ubiquitinated proteins; cleaves at the C terminus of ubiquitin fusions irrespective of their size; capable of cleaving polyubiquitin chains	chrIV	242552	244981
2				21	90	82	42
1	YDL123W	SNA4	423	1546	1498	1610	1173	Protein of unknown function; localized to the vacuolar outer membrane; predicted to be palmitoylated	chrIV	241418	241840
2				6	24	25	16
1	YDL124W		939	22161	20049	13182	5450	NADPH-dependent alpha-keto amide reductase; reduces aromatic alpha-keto amides, aliphatic alpha-keto esters, and aromatic alpha-keto esters; member of the aldo-keto reductase (AKR) family; protein abundance increases in response to DNA replication stress	chrIV	240259	241197
2				47	106	87	46
1	YDL125C	HNT1	588	47	778	1319	517	Adenosine 5'-monophosphoramidase; interacts physically and genetically with Kin28p, a CDK and TFIIK subunit, and genetically with CAK1; member of histidine triad (HIT) superfamily of nucleotide-binding proteins; protein abundance increases in response to DNA replication stress; human homolog HINT1 can complement yeast hnt1 mutant	chrIV	239019	239606
2				2	30	33	14
3				83	300	656	762
4				4	13	17	7
1	YDL126C	CDC48	2508	0	5	663	199	AAA ATPase; subunit of polyUb-selective segregase complex involved in ERAD, INM-associated degradation (INMAD), mitotic spindle disassembly, macroautophagy, PMN, ribosome-associated degradation, ribophagy, homotypic ER membrane fusion, SCF complex disassembly, cell wall integrity during heat stress, and telomerase regulation; mobilizes membrane-anchored transcription factors by regulated Ub/prote…	chrIV	236157	238664
2				0	1	2	4
1	YDL127W	PCL2	927	4942	4773	6489	3577	Cyclin, interacts with cyclin-dependent kinase Pho85p; member of the Pcl1,2-like subfamily, involved in the regulation of polarized growth and morphogenesis and progression through the cell cycle; localizes to sites of polarized cell growth; PCL2 has a paralog, PCL9, that arose from the whole genome duplication	chrIV	234927	235853
2				36	79	69	41
1	YDL128W	VCX1	1236	3858	3845	2568	2294	Vacuolar membrane antiporter with Ca2+/H+ and K+/H+ exchange activity; involved in control of cytosolic Ca2+ and K+ concentrations; has similarity to sodium/calcium exchangers, including the bovine Na+/Ca2+,K+ antiporter	chrIV	232652	233887
2				17	51	55	26
1	YDL129W		876	2809	2061	982	1610	Protein of unknown function; green fluorescent protein (GFP)-fusion protein localizes to the cytoplasm and the nucleus; YDL129W is not an essential gene; relative distribution to the nucleus increases upon DNA replication stress	chrIV	231024	231899
2				10	40	30	21
1	YDL130W	RPP1B	622	2055	1289	2164	4544	Ribosomal protein P1 beta; component of the ribosomal stalk, which is involved in interaction of translational elongation factors with ribosome; free (non-ribosomal) P1 stimulates the phosphorylation of the eIF2 alpha subunit (Sui2p) by Gcn2p; accumulation is regulated by phosphorylation and interaction with the P2 stalk component	chrIV	229906	230527
2				14	26	31	29
3				247	286	3491	1172
4				3	8	11	12
1	YDL130W-A	STF1	261	438	2819	1267	2782	Protein involved in regulation of the mitochondrial F1F0-ATP synthase; Stf1p and Stf2p act as stabilizing factors that enhance inhibitory action of the Inh1p protein; protein abundance increases in response to DNA replication stress; STF1 has a paralog, INH1, that arose from the whole genome duplication	chrIV	229171	229431
2				6	26	25	19
1	YDL131W	LYS21	1323	10033	20527	32676	10693	Homocitrate synthase isozyme; catalyzes the condensation of acetyl-CoA and alpha-ketoglutarate to form homocitrate, which is the first step in the lysine biosynthesis pathway; LYS21 has a paralog, LYS20, that arose from the whole genome duplication	chrIV	227393	228715
2				58	135	145	79
1	YDL132W	CDC53	2448	8	571	242	553	Cullin; structural protein of SCF complexes (which also contain Skp1p, Cdc34p, Hrt1p and an F-box protein) involved in ubiquitination; SCF promotes the G1-S transition by targeting G1 cyclins and the Cln-CDK inhibitor Sic1p for degradation; human homolog CUL1 can complement yeast cdc53 null mutant	chrIV	224304	226751
2				1	6	7	3
1	YDL133C-A	RPL41B	78	522	360	514	714	Ribosomal 60S subunit protein L41B; comprises only 25 amino acids; rpl41a rpl41b double null mutant is viable; homologous to mammalian ribosomal protein L41, no bacterial homolog; RPL41B has a paralog, RPL41A, that arose from the whole genome duplication	chrIV	221724	221801
2				2	7	4	4
1	YDL133W	SRF1	1314	962	4938	2343	2767	Regulator of phospholipase D (Spo14p); interacts with Spo14p and regulates its catalytic activity; capable of buffering the toxicity of C16:0 platelet activating factor, a lipid that accumulates intraneuronally in Alzheimer's patients	chrIV	222427	223740
2				18	83	64	43
1	YDL134C	PPH21	1110	227	1440	7848	4597	Catalytic subunit of protein phosphatase 2A (PP2A); functionally redundant with Pph22p; methylated at C terminus; forms alternate complexes with several regulatory subunits; involved in signal transduction and regulation of mitosis; forms nuclear foci upon DNA replication stress; PPH21 has a paralog, PPH22, that arose from the whole genome duplication	chrIV	219662	220771
2				10	55	51	30
1	YDL135C	RDI1	609	4004	3498	2334	2669	Rho GDP dissociation inhibitor; involved in the localization and regulation of Cdc42p and Rho1p; protein abundance increases in response to DNA replication stress	chrIV	218680	219288
2				19	41	42	22
1	YDL136W	RPL35B	768	6300	5527	5454	6778	Ribosomal 60S subunit protein L35B; homologous to mammalian ribosomal protein L35 and bacterial L29; RPL35B has a paralog, RPL35A, that arose from the whole genome duplication	chrIV	217600	218367
2				14	25	20	29
3				1546	3721	3947	2595
4				12	28	29	14
1	YDL137W	ARF2	546	734	3633	3369	2810	ADP-ribosylation factor; GTPase of the Ras superfamily involved in regulation of coated formation vesicles in intracellular trafficking within the Golgi; ARF2 has a paralog, ARF1, that arose from the whole genome duplication; arf1 arf2 double null mutation is complemented by human ARF1, ARF4, ARF5, or ARF6	chrIV	216529	217074
2				12	41	43	32
1	YDL138W	RGT2	2292	2522	8837	10928	5086	Plasma membrane high glucose sensor that regulates glucose transport; low affinity sesnor that contains 12 predicted transmembrane segments and a long C-terminal tail required for hexose transporter induction; phosphorylation of the tail by Yck1p/Yck2p facilitates binding to the HXT co-repressors, Mth1p and Std1p; RGT2 has a paralog, SNF3, that arose from the whole genome duplication	chrIV	213351	215642
2				36	140	121	56
1	YDL139C	SCM3	672	0	0	25	0	Nonhistone component of centromeric chromatin; binds to histone H3 variant, Cse4p, and recruits it to centromeres; involved in the assembly and maintenance of Cse4-H4 at centromeres; required for kinetochore assembly and G2/M progression; may protect Cse4p from ubiquitination; homolog of mammalian HJURP	chrIV	211375	212046
2				0	0	5	0
1	YDL140C	RPO21	5202	4	551	2743	399	RNA polymerase II largest subunit B220; part of central core; phosphorylation of C-terminal heptapeptide repeat domain regulates association with transcription and splicing factors; similar to bacterial beta-prime	chrIV	205360	210561
2				2	21	27	10
1	YDL141W	BPL1	2073	0	0	6	16	Biotin:apoprotein ligase; covalently modifies proteins with the addition of biotin, required for acetyl-CoA carboxylase (Acc1p) holoenzyme formation; comparative analysis suggests that a mitochondrially targeted form may result from translation starting at a non-canonical codon upstream of the annotated start codon; human homolog HLCS can complement yeast BPL1 mutant	chrIV	203039	205111
2				0	0	1	2
1	YDL142C	CRD1	852	14263	6144	5866	1835	Cardiolipin synthase; produces cardiolipin, which is a phospholipid of the mitochondrial inner membrane that is required for normal mitochondrial membrane potential and function and for correct integration of membrane-multispanning proteins into the mitochondrial outer membrane; required to maintain tubular mitochondrial morphology and functions in mitochondrial fusion; also required for normal v…	chrIV	201719	202570
2				39	80	65	29
1	YDL143W	CCT4	1587	0	2	21	1	Subunit of the cytosolic chaperonin Cct ring complex; related to Tcp1p, required for the assembly of actin and tubulins in vivo	chrIV	199996	201582
2				0	1	6	1
1	YDL144C		1071	5300	8448	9401	4137	Protein of unknown function; green fluorescent protein (GFP)-fusion protein localizes to the cytoplasm and nucleus; YDL144C is not an essential gene; protein abundance increases in response to DNA replication stress	chrIV	198662	199732
2				29	84	68	46
1	YDL145C	COP1	3606	0	305	750	1578	Alpha subunit of COPI vesicle coatomer complex; complex surrounds transport vesicles in the early secretory pathway	chrIV	194571	198176
2				0	14	14	7
1	YDL146W	LDB17	1476	267	431	1178	1030	Protein involved in the regulation of endocytosis; transiently recruited to actin cortical patches in a SLA1-dependent manner after late coat component assembly; GFP-fusion protein localizes to the periphery, cytoplasm, bud, and bud neck	chrIV	192750	194225
2				6	22	24	14
1	YDL147W	RPN5	1338	0	1809	1638	882	Subunit of the CSN and 26S proteasome lid complexes; similar to mammalian p55 subunit and to another S. cerevisiae regulatory subunit, Rpn7p; Rpn5p is an essential protein; the COP9 signalosome is also known as the CSN	chrIV	190924	192261
2				0	6	4	4
1	YDL148C	NOP14	2433	178	132	70	12	Nucleolar protein; forms a complex with Noc4p that mediates maturation and nuclear export of 40S ribosomal subunits; also present in the small subunit processome complex, which is required for processing of pre-18S rRNA	chrIV	188154	190586
2				3	10	7	2
1	YDL149W	ATG9	2994	2256	2690	7966	1923	Transmembrane protein involved in forming Cvt and autophagic vesicles; cycles between the phagophore assembly site (PAS) and other cytosolic punctate structures, not found in autophagosomes; may be involved in membrane delivery to the PAS	chrIV	184925	187918
2				20	73	78	30
1	YDL150W	RPC53	1269	32	197	46	75	RNA polymerase III subunit C53	chrIV	183343	184611
2				1	5	4	1
1	YDL151C	BUD30	582	0	1	1	0	Dubious open reading frame; unlikely to encode a functional protein, based on available experimental and comparative sequence data; not conserved in closely related Saccharomyces species; 96% of ORF overlaps the verified gene RPC53; diploid mutant displays a weak budding pattern phenotype in a systematic assay	chrIV	183318	183899
2				0	1	1	0
1	YDL152W		366	0	0	0	0	Dubious open reading frame; unlikely to encode a functional protein, based on available experimental and comparative sequence data; partially overlaps the verified ORF SAS10/YDL153C, a component of the small ribosomal subunit processosome	chrIV	182822	183187
2				0	0	0	0
1	YDL153C	SAS10	1833	0	4	2	0	Subunit of U3-containing Small Subunit (SSU) processome complex; involved in production of 18S rRNA and assembly of small ribosomal subunit; disrupts silencing when overproduced; mutant has increased aneuploidy tolerance; essential gene	chrIV	181186	183018
2				0	1	1	0
1	YDL154W	MSH5	2706	13826	4564	9140	2448	Protein of the MutS family; forms a dimer with Msh4p that facilitates crossovers between homologs during meiosis; msh5-Y823H mutation confers tolerance to DNA alkylating agents; homologs present in C. elegans and humans	chrIV	178334	181039
2				23	96	82	48
1	YDL155W	CLB3	1284	555	3053	1874	1417	B-type cyclin involved in cell cycle progression; activates Cdc28p to promote the G2/M transition; may be involved in DNA replication and spindle assembly; accumulates during S phase and G2, then targeted for ubiquitin-mediated degradation; relative distribution to the nucleus increases upon DNA replication stress; CLB3 has a paralog, CLB4, that arose from the whole genome duplication	chrIV	176773	178056
2				12	39	37	31
1	YDL156W	CMR1	1569	5700	4386	4877	2226	Nuclear protein with a role in protein quality control; localizes to the intranuclear quality control compartment (INQ) in response to proteasome inhibition or DNA replication stress; INQ likely sequesters proteins involved in DNA metabolism for degradation or re-folding; DNA-binding protein with preference for UV-damaged DNA; contains three WD domains (WD-40 repeat); human ortholog WDR76 also ex…	chrIV	174918	176486
2				28	78	59	32
1	YDL157C		357	2677	2126	820	487	Putative protein of unknown function; the authentic, non-tagged protein is detected in highly purified mitochondria in high-throughput studies	chrIV	174232	174588
2				8	23	20	7
1	YDL158C		309	2686	504	1052	631	Dubious open reading frame; unlikely to encode a functional protein, based on available experimental and comparative sequence data	chrIV	173866	174174
2				5	12	15	7
1	YDL159C-B		177	9	176	174	73	Putative protein of unknown function; identified by gene-trapping, microarray-based expression analysis, and genome-wide homology searching	chrIV	173056	173232
2				1	8	3	4
1	YDL159W	STE7	1548	2172	1958	4401	1350	Signal transducing MAP kinase kinase; involved in pheromone response where it phosphorylates Fus3p; involved in the pseudohyphal/invasive growth pathway where it phosphorylates of Kss1p; phosphorylated by Ste11p; degraded by ubiquitin pathway	chrIV	172481	174028
2				21	62	52	25
1	YDL159W-A		132	0	0	0	0	Putative protein of unknown function; identified by sequence comparison with hemiascomycetous yeast species	chrIV	172182	172313
2				0	0	0	0
1	YDL160C	DHH1	1521	0	40	91	2	Cytoplasmic DEAD-box helicase, stimulates mRNA decapping; coordinates distinct steps in mRNA function and decay, interacting with both decapping and deadenylase complexes; role in translational repression, mRNA decay, and possibly mRNA export; interacts and cooperates with Ngr1p to promote specific mRNA decay; ATP- and RNA-bound form promotes processing body (PB) assembly, while ATPase stimulatio…	chrIV	170410	171930
2				0	3	5	1
1	YDL160C-A	MHF2	243	540	2766	1072	733	Component of the heterotetrameric MHF histone-fold complex; in humans the MHF complex interacts with both DNA and Mph1p ortholog FANCM to stabilize and remodel blocked replication forks and repair damaged DNA; mhf2 srs2 double mutants are MMS hypersensitive; orthologous to human centromere constitutive-associated network (CCAN) subunit CENP-X, also known as MHF2	chrIV	169366	169608
2				6	19	11	10
1	YDL161W	ENT1	1365	563	2212	2447	1368	Epsin-like protein involved in endocytosis and actin patch assembly; functionally redundant with Ent2p; binds clathrin via a clathrin-binding domain motif at C-terminus; relocalizes from bud neck to cytoplasm upon DNA replication stress; ENT1 has a paralog, ENT2, that arose from the whole genome duplication	chrIV	167714	169078
2				7	37	23	20
1	YDL162C		357	7277	6956	8132	6293	Dubious open reading frame; unlikely to encode a functional protein, based on available experimental and comparative sequence data; partially overlaps ENT1/YDL161W, a verified gene involved in endocytosis and actin cortical patch assembly	chrIV	167359	167715
2				26	52	42	32
1	YDL163W		303	41	0	11	0	Dubious open reading frame; unlikely to encode a functional protein, based on available experimental and comparative sequence data; partially overlaps the verified gene CDC9/YDL164C encoding DNA ligase	chrIV	166956	167258
2				1	0	1	0
1	YDL164C	CDC9	2268	54	4	32	11	DNA ligase I found in nucleus and mitochondria; essential enzyme that joins Okazaki fragments during DNA replication; also acts in ribonucleotide excision repair, base excision repair, and recombination; DNA ligase I mutants trigger ubiquitination of PCNA at K107, facilitating Rad59p-mediated bypass of unligated Okazaki fragments; human homolog LIG1 can complement yeast cdc9 temperature-sensitive…	chrIV	164987	167254
2				2	1	6	1
1	YDL165W	CDC36	576	0	0	0	6	Component of the CCR4-NOT core complex, involved in mRNA decapping; this complex has multiple roles in regulating mRNA levels including regulation of transcription and destabilizing mRNAs through deadenylation; basal transcription factor	chrIV	164290	164865
2				0	0	0	1
1	YDL166C	FAP7	594	17	2	6	7	Essential NTPase required for small ribosome subunit synthesis; mediates processing of the 20S pre-rRNA at site D in the cytoplasm but associates only transiently with 43S preribosomes via Rps14p; complex with Rps14 is conserved between humans, yeast, and arches; may be the endonuclease for site D; depletion leads to accumulation of pre-40S ribosomes in 80S-like ribosomes; human TAF9 functionally…	chrIV	163449	164042
2				1	1	2	2
1	YDL167C	NRP1	2160	971	6516	24646	10936	Putative RNA binding protein of unknown function; localizes to stress granules induced by glucose deprivation; predicted to be involved in ribosome biogenesis	chrIV	160995	163154
2				7	94	100	52
1	YDL168W	SFA1	1161	16101	3640	3926	441	Bifunctional alcohol dehydrogenase and formaldehyde dehydrogenase; formaldehyde dehydrogenase activity is glutathione-dependent; functions in formaldehyde detoxification and formation of long chain and complex alcohols, regulated by Hog1p-Sko1p; protein abundance increases in response to DNA replication stress	chrIV	159604	160764
2				14	48	45	15
1	YDL169C	UGX2	672	2917	4074	3486	1538	Protein of unknown function; transcript accumulates in response to any combination of stress conditions	chrIV	158064	158735
2				15	41	36	17
1	YDL170W	UGA3	1587	1252	4703	4531	1487	Transcriptional activator for GABA-dependent induction of GABA genes; binds to DNA elements found in the promoters of target genes and increases their expression in the presence of GABA (gamma-aminobutyrate); zinc finger transcription factor of the Zn(2)-Cys(6) binuclear cluster domain type; localized to the nucleus; examples of GABA genes include UGA1, UGA2, and UGA4	chrIV	156318	157904
2				19	83	79	35
1	YDL171C	GLT1	6438	23887	28648	16579	10826	NAD(+)-dependent glutamate synthase (GOGAT); synthesizes glutamate from glutamine and alpha-ketoglutarate; with Gln1p, forms the secondary pathway for glutamate biosynthesis from ammonia; expression regulated by nitrogen source; assembles into filaments as cells approach stationary phase and under cytosolic acidification and starvation conditions	chrIV	149203	155640
2				122	311	289	144
1	YDL172C		480	0	10	0	3	Dubious open reading frame; unlikely to encode a functional protein, based on available experimental and comparative sequence data	chrIV	148607	149086
2				0	3	0	1
1	YDL173W	PAR32	888	0	3	1	3	Protein of unknown function; hyperphosphorylated upon rapamycin treatment in a Tap42p-dependent manner; green fluorescent protein (GFP)-fusion protein localizes to the cytoplasm; PAR32 is not an essential gene	chrIV	148191	149078
2				0	2	1	1
1	YDL174C	DLD1	1764	6944	10262	9162	2816	Major mitochondrial D-lactate dehydrogenase; oxidizes D-lactate to pyruvate, transcription is heme-dependent, repressed by glucose, and derepressed in ethanol or lactate; located in the mitochondrial inner membrane	chrIV	145826	147589
[truncated: 11,879 more rows]

## Sheet: Intron Containing Only
				YHE1609	YHE1608	YHE1609	YHE1609
1: Exon Counts Sequence Reads No Introns				[URE3] -Ade	[ure-o]	[URE3]	[URE3]
2: Exon Counts Unique Insertions No Introns	Systematic	Standard	Gene	-Ade		+Ade 1st	+Ade 2nd
3: Intron Counts Sequence Reads	Name	Name	length	Counts	Counts	Counts	Counts			Gene	Gene
4: Intron Counts Unique Insertions										start	end
1	YAL001C	TFC3	3573	385	518	200	171	Subunit of RNA polymerase III transcription initiation factor complex; part of the TauB domain of TFIIIC that binds DNA at the BoxB promoter sites of tRNA and similar genes; cooperates with Tfc6p in DNA binding; largest of six subunits of the RNA polymerase III transcription initiation factor complex (TFIIIC)	chrI	147594	151166
2				2	12	13	5
3				0	0	1	0
4				0	0	1	0
1	YAL003W	EFB1	987	0	51	33	0	Translation elongation factor 1 beta; stimulates nucleotide exchange to regenerate EF-1 alpha-GTP for the next elongation cycle; part of the EF-1 complex, which facilitates binding of aminoacyl-tRNA to the ribosomal A site; human homolog EEF1B2 can complement yeast efb1 mutants	chrI	142174	143160
2				0	2	1	0
3				0	14	0	0
4				0	2	0	0
1	YAL030W	SNC1	467	1181	530	721	774	Vesicle membrane receptor protein (v-SNARE); involved in the fusion between Golgi-derived secretory vesicles with the plasma membrane; proposed to be involved in endocytosis; member of the synaptobrevin/VAMP family of R-type v-SNARE proteins; SNC1 has a paralog, SNC2, that arose from the whole genome duplication	chrI	87286	87752
2				6	17	15	7
3				111	375	353	42
4				1	6	8	2
1	YBL018C	POP8	477	2	19	17	4	Subunit of both RNase MRP and nuclear RNase P; RNase MRP cleaves pre-rRNA, while nuclear RNase P cleaves tRNA precursors to generate mature 5' ends and facilitates turnover of nuclear RNAs; relocalizes to the cytosol in response to hypoxia	chrII	185998	186474
2				1	2	2	1
3				0	6	0	3
4				0	1	0	1
1	YBL026W	LSM2	416	5	69	13	0	Lsm (Like Sm) protein; part of heteroheptameric complexes (Lsm2p-7p and either Lsm1p or 8p): cytoplasmic Lsm1p complex involved in mRNA decay; nuclear Lsm8p complex part of U6 snRNP and possibly involved in processing tRNA, snoRNA, and rRNA; relocalizes from nucleus to cytoplasmic foci upon DNA replication stress	chrII	170623	171038
2				1	2	3	0
3				0	0	0	0
4				0	0	0	0
1	YBL027W	RPL19B	954	2479	1119	1271	3138	Ribosomal 60S subunit protein L19B; rpl19a and rpl19b single null mutations result in slow growth, while the double null mutation is lethal; homologous to mammalian ribosomal protein L19, no bacterial homolog; RPL19B has a paralog, RPL19A, that arose from the whole genome duplication	chrII	168423	169376
2				13	21	35	27
3				1605	808	765	1478
4				15	16	23	12
1	YBL040C	ERD2	757	2810	1137	1634	1479	HDEL receptor; an integral membrane protein that binds to the HDEL motif in proteins destined for retention in the endoplasmic reticulum; has a role in maintenance of normal levels of ER-resident proteins	chrII	142112	142868
2				2	3	5	5
3				0	0	0	0
4				0	0	0	0
1	YBL050W	SEC17	995	442	154	91	183	Alpha-SNAP cochaperone; SNARE-complex adaptor for Sec18 (NSF) during the disassembly of postfusion cis-SNARE complexes; stimulates the ATPase activity of Sec18p; peripheral membrane protein required for vesicular transport between ER and Golgi, the 'priming' step in homotypic vacuole fusion, and autophagy; similar to mammalian alpha-SNAP	chrII	125125	126119
2				1	3	3	2
3				0	0	0	0
4				0	0	0	0
1	YBL059C-A	CMC2	415	2427	1	213	37	Protein involved in respiratory chain complex assembly or maintenance; protein of the mitochondrial intermembrane space; contains twin Cx9C motifs that can form coiled coil-helix-coiled-coil helix fold	chrII	110125	110539
2				7	1	3	2
3				0	1	0	4
4				0	1	0	1
1	YBL059W		651	3688	2187	1250	475	Putative protein of unknown function; the authentic, non-tagged protein is detected in highly purified mitochondria in high-throughput studies; YBL059W has a paralog, YER093C-A, that arose from the whole genome duplication	chrII	110594	111244
2				8	27	23	16
3				2634	209	9	24
4				2	5	2	1
1	YBL087C	RPL23A	918	3311	1960	4317	5875	Ribosomal 60S subunit protein L23A; homologous to mammalian ribosomal protein L23 and bacterial L14; RPL23A has a paralog, RPL23B, that arose from the whole genome duplication	chrII	59822	60739
2				17	37	48	31
3				2589	5558	3164	13730
4				10	42	29	33
1	YBL091C-A	SCS22	616	1633	2201	2210	1443	Protein involved in regulation of phospholipid metabolism; one of 6 proteins (Ist2p, Scs2p, Scs22p, Tcb1p, Tcb2p, Tcb3p) that connect the ER and plasma membrane (PM); regulates PM PI4P levels by controlling access of the Sac1p phosphatase to its substrate, PI4P; human VAP homolog; similar to D. melanogaster inturned protein; SWAT-GFP and mCherry fusion proteins localize to the cytosol; SCS22 has …	chrII	46565	47180
2				12	40	28	17
3				582	131	5	65
4				2	3	1	3
1	YBL111C		2103	251545	233251	213079	149732	Helicase-like protein encoded within the telomeric Y' element; relocalizes from mitochondrion to cytoplasm upon DNA replication stress	chrII	2907	5009
2				166	324	294	202
3				3227	3038	2866	1431
4				8	20	16	8
1	YBR048W	RPS11B	982	207	524	187	140	Protein component of the small (40S) ribosomal subunit; homologous to mammalian ribosomal protein S11 and bacterial S17; RPS11B has a paralog, RPS11A, that arose from the whole genome duplication	chrII	332831	333812
2				8	27	23	11
3				70	260	155	145
4				2	14	8	8
1	YBR062C		625	7480	1973	3046	1416	Protein of unknown function that interacts with Msb2p; may play a role in activation of the filamentous growth pathway	chrII	365976	366600
2				11	21	16	16
3				5	13	0	27
4				1	3	0	2
1	YBR078W	ECM33	1620	0	7	0	10	GPI-anchored protein of unknown function; possible role in apical bud growth; GPI-anchoring on the plasma membrane crucial to function; phosphorylated in mitochondria; similar to Sps2p; ECM33 has a paralog, PST1, that arose from the whole genome duplication	chrII	393123	394742
2				0	1	0	2
3				0	2	5	36
4				0	1	2	6
1	YBR082C	UBC4	542	656	13683	6964	4265	Ubiquitin-conjugating enzyme (E2); key E2 partner with Ubc1p for the anaphase-promoting complex (APC); mediates degradation of abnormal or excess proteins, including calmodulin and histone H3; regulates levels of DNA Polymerase-{alpha} to promote efficient and accurate DNA replication; interacts with many SCF ubiquitin protein ligases; component of the cellular stress response; UBC4 has a paralog…	chrII	406628	407169
2				11	49	40	25
3				0	650	161	169
4				0	9	5	5
1	YBR084C-A	RPL19A	1076	9566	4323	6349	7707	Ribosomal 60S subunit protein L19A; rpl19a and rpl19b single null mutations result in slow growth, while the double null mutation is lethal; homologous to mammalian ribosomal protein L19, no bacterial homolog; RPL19A has a paralog, RPL19B, that arose from the whole genome duplication	chrII	414186	415261
2				23	46	41	34
3				3304	2201	2726	4747
4				7	26	25	18
1	YBR090C		726	27428	25773	37173	25262	Putative protein of unknown function; green fluorescent protein (GFP)-fusion protein localizes to the cytoplasm and nucleus	chrII	426333	427058
2				50	94	85	65
3				12682	19773	27749	15871
4				31	69	61	48
1	YBR111W-A	SUS1	441	0	1	0	4	Component of both the SAGA histone acetylase and TREX-2 complexes; interacts with RNA polymerase II; involved in mRNA export coupled transcription activation and elongation; involved in post-transcriptional tethering of active genes to the nuclear periphery and to non-nascent mRNP	chrII	462139	462579
2				0	1	0	1
3				0	1	0	0
4				0	1	0	0
1	YBR119W	MUD1	986	299	590	671	156	U1 snRNP A protein; homolog of human U1-A; involved in nuclear mRNA splicing	chrII	479338	480323
2				4	22	19	6
3				40	137	146	598
4				3	6	3	2
1	YBR181C	RPS6B	1063	10	145	37	18	Protein component of the small (40S) ribosomal subunit; homologous to mammalian ribosomal protein S6, no bacterial homolog; phosphorylated on S233 by Ypk3p in a TORC1-dependent manner, and on S232 in a TORC1/2-dependent manner by Ypk1/2/3p; RPS6B has a paralog, RPS6A, that arose from the whole genome duplication	chrII	591712	592774
2				2	12	6	4
3				20	108	256	28
4				1	10	9	2
1	YBR186W	PCH2	1808	1568	5343	5313	3771	Hexameric ring ATPase that remodels chromosome axis protein Hop1p; nucleolar component of the pachytene checkpoint, which prevents chromosome segregation when recombination and chromosome synapsis are defective; also represses meiotic interhomolog recombination in rDNA; required for meiotic double-stranded break formation	chrII	600553	602360
2				24	76	61	49
3				0	36	20	229
4				0	3	2	3
1	YBR189W	RPS9B	1001	1264	789	1188	648	Protein component of the small (40S) ribosomal subunit; homologous to mammalian ribosomal protein S9 and bacterial S4; RPS9B has a paralog, RPS9A, that arose from the whole genome duplication	chrII	604508	605508
2				5	8	11	7
3				0	0	6	0
4				0	0	2	0
1	YBR191W	RPL21A	871	837	370	188	956	Ribosomal 60S subunit protein L21A; homologous to mammalian ribosomal protein L21, no bacterial homolog; RPL21A has a paralog, RPL21B, that arose from the whole genome duplication	chrII	606270	607140
2				9	11	10	18
3				18	35	0	0
4				2	6	0	0
1	YBR215W	HPC2	1962	7	348	262	214	Subunit of the HIR complex; HIR is a nucleosome assembly complex involved in regulation of histone gene transcription; mutants display synthetic defects with subunits of FACT, a complex that allows passage of RNA Pol II through nucleosomes	chrII	653356	655317
2				1	27	19	6
3				0	2	42	20
4				0	1	3	2
1	YBR219C		805	19098	4266	3861	4632	Putative protein of unknown function; YBR219C is not an essential gene	chrII	662499	663303
2				17	35	32	19
3				24572	18945	12036	13310
4				33	73	61	49
1	YBR230C	OM14	502	12810	10109	9797	9870	Mitochondrial outer membrane receptor for cytosolic ribosomes; integral protein of the outer membrane that interacts with the nascent chain-associated complex (NAC) bound to ribosomes, contributing to co-translational mitochondrial import; interacts with porin (Por1p) and Om45p; abundance is decreased in cells grown in glucose relative to other carbon sources	chrII	679549	680050
2				19	46	40	38
3				1240	3107	1683	529
4				5	13	12	7
1	YBR255C-A	RCF3	457	453	1978	1750	2713	Putative protein of unknown function; may interact with respiratory chain complexes III (ubiquinol-cytochrome c reductase) or IV (cytochrome c oxidase); identified by sequence comparison with hemiascomycetous yeast species	chrII	726618	727074
2				4	15	13	9
3				0	0	0	0
4				0	0	0	0
1	YCL002C		868	1418	2090	2340	1090	Putative protein of unknown function; YCL002C is not an essential gene	chrIII	110808	111675
2				18	38	45	21
3				227	82	68	244
4				4	4	4	3
1	YCL005W-A	VMA9	395	61	19	113	319	Vacuolar H+ ATPase subunit e of the V-ATPase V0 subcomplex; essential for vacuolar acidification; interacts with the V-ATPase assembly factor Vma21p in the ER; involved in V0 biogenesis	chrIII	107023	107417
2				1	2	1	2
3				0	0	0	0
4				0	0	0	0
1	YCL012C		472	2448	1558	1241	2795	Protein of unknown function; SWAT-GFP and mCherry fusion proteins localize to the endoplasmic reticulum and vacuole respectively; orthologs are present in S. bayanus, S. paradoxus and Ashbya gossypii; YCL012C is not an essential gene	chrIII	101317	101788
2				7	17	15	18
3				556	750	724	643
4				4	6	11	8
1	YCR028C-A	RIM1	491	1056	0	0	42	ssDNA-binding protein essential for mitochondrial genome maintenance; involved in mitochondrial DNA replication; stimulates utilization by Mip1p DNA polymerase of RNA primers synthesized by Rpo41p	chrIII	172950	173440
2				6	0	0	2
3				0	0	0	0
4				0	0	0	0
1	YCR031C	RPS14A	721	3270	5010	4075	2758	Protein component of the small (40S) ribosomal subunit; required for ribosome assembly and 20S pre-rRNA processing; mutations confer cryptopleurine resistance; homologous to mammalian ribosomal protein S14 and bacterial S11; RPS14A has a paralog, RPS14B, that arose from the whole genome duplication	chrIII	177500	178220
2				9	36	30	23
3				170	745	439	89
4				4	17	18	7
1	YCR097W	HMRA1	487	2684	1330	1655	365	Silenced copy of a1 at HMR; homeobox corepressor that interacts with Alpha2p to repress haploid-specific gene transcription in diploid cells	chrIII	293835	294321
2				10	22	17	9
3				590	1530	992	1195
4				4	14	12	7
1	YDL012C		410	1596	775	547	981	Tail-anchored plasma membrane protein with a conserved CYSTM module; possibly involved in response to stress; may contribute to non-homologous end-joining (NHEJ) based on ydl012c htz1 double null phenotype; YDL012C has a paralog, YBR016W, that arose from the whole genome duplication	chrIV	431108	431517
2				2	12	11	6
3				242	28	58	39
4				1	4	4	3
1	YDL029W	ARP2	1299	0	4	2	5	Essential component of the Arp2/3 complex; Arp2/3 is a highly conserved actin nucleation center required for the motility and integrity of actin patches; involved in endocytosis and membrane growth and polarity; required for efficient Golgi-to-ER trafficking in COPI mutants	chrIV	399340	400638
2				0	2	1	1
3				0	4	0	0
4				0	1	0	0
1	YDL064W	UBC9	584	0	3	14	0	SUMO-conjugating enzyme involved in the Smt3p conjugation pathway; nuclear protein required for S- and M-phase cyclin degradation and mitotic control; involved in proteolysis mediated by the anaphase-promoting complex cyclosome (APCC)	chrIV	337487	338070
2				0	1	2	0
3				0	2	3	0
4				0	1	1	0
1	YDL075W	RPL31A	763	25	37	26	139	Ribosomal 60S subunit protein L31A; associates with karyopherin Sxm1p; loss of both Rpl31p and Rpl39p confers lethality; homologous to mammalian ribosomal protein L31, no bacterial homolog; RPL31A has a paralog, RPL31B, that arose from the whole genome duplication	chrIV	322226	322988
2				1	3	2	1
3				0	0	0	0
4				0	0	0	0
1	YDL079C	MRK1	1798	17814	12675	14163	6852	Glycogen synthase kinase 3 (GSK-3) homolog; one of four GSK-3 homologs in S. cerevisiae that function to activate Msn2p-dependent transcription of stress responsive genes and that function in protein degradation; MRK1 has a paralog, RIM11, that arose from the whole genome duplication	chrIV	312951	314748
2				45	118	107	65
3				1555	2259	1600	863
4				8	35	30	13
1	YDL082W	RPL13A	965	869	1729	1170	5125	Ribosomal 60S subunit protein L13A; not essential for viability; homologous to mammalian ribosomal protein L13, no bacterial homolog; RPL13A has a paralog, RPL13B, that arose from the whole genome duplication	chrIV	308424	309388
2				4	23	23	18
3				12778	8173	7014	6583
4				11	28	21	18
1	YDL083C	RPS16B	864	264	463	228	88	Protein component of the small (40S) ribosomal subunit; homologous to mammalian ribosomal protein S16 and bacterial S9; RPS16B has a paralog, RPS16A, that arose from the whole genome duplication	chrIV	306926	307789
2				7	17	12	8
3				11	149	44	105
4				1	13	11	5
1	YDL108W	KIN28	1002	45	6	200	38	Serine/threonine protein kinase, subunit of transcription factor TFIIH; involved in transcription initiation at RNA polymerase II promoters; phosphorylates Ser5 residue of the PolII C-terminal domain (CTD) at gene promoters; relocalizes to the cytosol in response to hypoxia	chrIV	267698	268699
2				2	2	7	3
3				0	0	0	0
4				0	0	0	0
1	YDL115C	IWR1	1132	7990	4670	1962	4581	RNA polymerase II transport factor, conserved from yeast to humans; also has a role in transporting RNA polymerase III into the nucleus; interacts with most of the RNAP II subunits; nucleo-cytoplasmic shuttling protein; deletion causes hypersensitivity to K1 killer toxin; protein increases in abundance and relocalizes from nucleus to cytoplasm upon DNA replication stress	chrIV	253995	255126
2				12	22	20	18
3				0	0	0	0
4				0	0	0	0
1	YDL125C	HNT1	588	47	778	1319	517	Adenosine 5'-monophosphoramidase; interacts physically and genetically with Kin28p, a CDK and TFIIK subunit, and genetically with CAK1; member of histidine triad (HIT) superfamily of nucleotide-binding proteins; protein abundance increases in response to DNA replication stress; human homolog HINT1 can complement yeast hnt1 mutant	chrIV	239019	239606
2				2	30	33	14
3				83	300	656	762
4				4	13	17	7
1	YDL130W	RPP1B	622	2055	1289	2164	4544	Ribosomal protein P1 beta; component of the ribosomal stalk, which is involved in interaction of translational elongation factors with ribosome; free (non-ribosomal) P1 stimulates the phosphorylation of the eIF2 alpha subunit (Sui2p) by Gcn2p; accumulation is regulated by phosphorylation and interaction with the P2 stalk component	chrIV	229906	230527
2				14	26	31	29
3				247	286	3491	1172
4				3	8	11	12
1	YDL136W	RPL35B	768	6300	5527	5454	6778	Ribosomal 60S subunit protein L35B; homologous to mammalian ribosomal protein L35 and bacterial L29; RPL35B has a paralog, RPL35A, that arose from the whole genome duplication	chrIV	217600	218367
2				14	25	20	29
3				1546	3721	3947	2595
4				12	28	29	14
1	YDL191W	RPL35A	854	5981	5251	5177	6044	Ribosomal 60S subunit protein L35A; homologous to mammalian ribosomal protein L35 and bacterial L29; RPL35A has a paralog, RPL35B, that arose from the whole genome duplication	chrIV	117664	118517
2				12	21	18	22
3				9	0	0	0
4				1	0	0	0
1	YDL219W	DTD1	524	604	264	222	377	D-Tyr-tRNA(Tyr) deacylase; functions in protein translation, may affect nonsense suppression via alteration of the protein synthesis machinery; ubiquitous among eukaryotes	chrIV	65242	65765
2				1	8	5	3
3				181	27	91	8
4				1	2	3	1
1	YDR005C	MAF1	1268	22	51	2	2	Highly conserved negative regulator of RNA polymerase III; involved in tRNA processing and stability; inhibits tRNA degradation via rapid tRNA decay (RTD) pathway; binds N-terminal domain of Rpc160p subunit of Pol III to prevent closed-complex formation; regulated by phosphorylation mediated by TORC1, protein kinase A, Sch9p, casein kinase 2; localizes to cytoplasm during vegetative growth and tr…	chrIV	456836	458103
2				2	4	1	2
3				0	0	0	0
4				0	0	0	0
1	YDR025W	RPS11A	810	220	829	258	102	Protein component of the small (40S) ribosomal subunit; homologous to mammalian ribosomal protein S11 and bacterial S17; N-terminally propionylated in vivo; RPS11A has a paralog, RPS11B, that arose from the whole genome duplication	chrIV	491515	492324
2				8	33	19	9
3				0	135	56	28
4				0	8	9	3
1	YDR059C	UBC5	537	971	1373	1778	795	Ubiquitin-conjugating enzyme; mediates selective degradation of short-lived, abnormal, or excess proteins, including histone H3; central component of the cellular stress response; expression is heat inducible; protein abundance increases in response to DNA replication stress; UBC5 has a paralog, UBC4, that arose from the whole genome duplication	chrIV	569234	569770
2				6	23	17	9
3				66	13	0	54
4				1	1	0	2
1	YDR064W	RPS13	995	0	88	10	6	Protein component of the small (40S) ribosomal subunit; homologous to mammalian ribosomal protein S13 and bacterial S15	chrIV	579458	580452
2				0	1	2	1
3				0	0	1	0
4				0	0	1	0
1	YDR092W	UBC13	730	0	55	56	145	E2 ubiquitin-conjugating enzyme; involved in the error-free DNA postreplication repair pathway; interacts with Mms2p to assemble ubiquitin chains at the Ub Lys-63 residue; DNA damage triggers redistribution from the cytoplasm to the nucleus	chrIV	629876	630605
2				0	5	6	4
3				1	107	270	122
4				1	13	12	3
1	YDR129C	SAC6	2040	0	100	210	135	Fimbrin, actin-bundling protein; cooperates with Scp1p in organization and maintenance of the actin cytoskeleton; phosphorylated by Cdc28p/Clb2p in metaphase on T103, to regulate conformation, and modulate actin filament binding affinity and actin cable dynamics; relocalizes from the plasma membrane to the cytoplasm upon DNA replication stress; human homologs PLS3 and LCP1 implicated in spinocere…	chrIV	713340	715379
2				0	10	14	12
3				0	0	54	2
4				0	0	3	1
1	YDR139C	RUB1	307	0	572	24	0	Ubiquitin-like protein with similarity to mammalian NEDD8; conjugation (neddylation) substrates include the cullins Cdc53p, Rtt101p, and Cul3p; activated by Ula1p and Uba3p (E1 enzyme pair); conjugation mediated by Ubc12p (E2 enzyme)	chrIV	733618	733924
2				0	12	4	0
3				0	2	0	0
4				0	1	0	0
1	YDR305C	HNT2	743	9748	3009	2819	3486	Dinucleoside triphosphate hydrolase; has similarity to the tumor suppressor FHIT and belongs to the histidine triad (HIT) superfamily of nucleotide-binding proteins	chrIV	1072746	1073488
2				10	33	33	28
3				2671	2645	1468	1574
4				3	9	13	9
1	YDR318W	MCM21	1190	1475	1223	1122	1083	Component of the kinetochore sub-complex COMA; COMA (Ctf19p, Okp1p, Mcm21p, Ame1p) bridges kinetochore subunits in contact with centromeric DNA with subunits bound to microtubules during kinetochore assembly; involved in minichromosome maintenance; modified by sumoylation; orthologous to human centromere constitutive-associated network (CCAN) subunit CENP-O and fission yeast mal2	chrIV	1103758	1104947
2				11	29	30	18
3				793	136	223	14
4				2	3	5	1
1	YDR367W	KEI1	767	484	1459	1536	1023	Component of inositol phosphorylceramide (IPC) synthase; forms a complex with Aur1p and regulates its activity; required for IPC synthase complex localization to the Golgi; post-translationally processed by Kex2p; KEI1 is an essential gene	chrIV	1212848	1213614
2				1	8	5	3
3				0	0	0	0
4				0	0	0	0
1	YDR381C-A		539	598	808	1	315	Protein of unknown function; localized to the mitochondrial outer membrane	chrIV	1238312	1238850
2				6	20	1	9
3				106	141	0	31
4				4	12	0	2
1	YDR381W	YRA1	1447	0	0	0	0	Nuclear polyadenylated RNA-binding protein; required for export of poly(A)+ mRNA from the nucleus; proposed to couple mRNA export with 3' end processing via its interactions with Mex67p and Pcf11p; interacts with DBP2; inhibits the helicase activity of Dbp2; functionally redundant with Yra2p, another REF family member	chrIV	1236558	1238004
2				0	0	0	0
3				0	0	2	0
4				0	0	1	0
1	YDR397C	NCB2	533	1814	323	1572	401	Subunit of a heterodimeric NC2 transcription regulator complex; complex binds to TBP and can repress transcription by preventing preinitiation complex assembly or stimulate activated transcription; homologous to human NC2beta; complex also includes Bur6p	chrIV	1266366	1266898
2				3	5	4	3
3				0	0	0	0
4				0	0	0	0
1	YDR424C	DYN2	455	4	539	254	73	Cytoplasmic light chain dynein, microtubule motor protein; required for intracellular transport and cell division; involved in mitotic spindle positioning; forms complex with dynein intermediate chain Pac11p that promotes Dyn1p homodimerization, potentiates motor processivity; Dyn2p-Pac11p complex important for interaction of dynein motor complex with dynactin complex; acts as molecular glue to d…	chrIV	1319387	1319841
2				1	19	18	6
3				0	151	57	5
4				0	8	7	1
1	YDR447C	RPS17B	725	314	993	666	602	Ribosomal protein 51 (rp51) of the small (40s) subunit; homologous to mammalian ribosomal protein S17, no bacterial homolog; RPS17B has a paralog, RPS17A, that arose from the whole genome duplication; protein abundance increases in response to DNA replication stress	chrIV	1354829	1355553
2				3	23	19	12
3				3003	2088	1271	353
4				7	23	20	11
1	YDR450W	RPS18A	876	69	1097	1007	78	Protein component of the small (40S) ribosomal subunit; homologous to mammalian ribosomal protein S18 and bacterial S13; RPS18A has a paralog, RPS18B, that arose from the whole genome duplication; protein increases in abundance and relocalizes from cytoplasm to nuclear foci upon DNA replication stress	chrIV	1359923	1360798
2				5	23	19	8
3				42	121	101	79
4				3	11	13	2
1	YDR471W	RPL27B	795	7776	5195	5796	12259	Ribosomal 60S subunit protein L27B; homologous to mammalian ribosomal protein L27, no bacterial homolog; RPL27B has a paralog, RPL27A, that arose from the whole genome duplication	chrIV	1401770	1402564
2				15	47	45	30
3				5598	5416	8227	3310
4				6	30	20	14
1	YDR500C	RPL37B	656	3951	1887	1732	2181	Ribosomal 60S subunit protein L37B; required for processing of 27SB pre-rRNA and formation of stable 66S assembly intermediates; protein abundance increases in response to DNA replication stress; homologous to mammalian ribosomal protein L37, no bacterial homolog; RPL37B has a paralog, RPL37A, that arose from the whole genome duplication	chrIV	1450198	1450853
2				11	23	23	16
3				3331	1861	2444	2070
4				9	24	23	15
1	YDR535C		757	7300	12294	9725	7538	Dubious open reading frame; unlikely to encode a functional protein, based on available experimental and comparative sequence data; YDR535C is not an essential gene	chrIV	1506606	1507362
2				23	69	63	37
3				39246	88338	76869	37835
4				37	87	73	61
1	YEL003W	GIM4	424	3846	4243	2408	5398	Subunit of the heterohexameric cochaperone prefoldin complex; complex binds specifically to cytosolic chaperonin and transfers target proteins to it	chrV	148176	148599
2				12	25	21	16
3				565	382	553	99
4				2	5	6	4
1	YEL012W	UBC8	780	468	652	1254	582	Ubiquitin-conjugating enzyme that regulates gluconeogenesis; negatively regulates gluconeogenesis by mediating the glucose-induced ubiquitination of fructose-1,6-bisphosphatase (FBPase); cytoplasmic enzyme that catalyzes the ubiquitination of histones in vitro	chrV	131772	132551
2				10	31	28	14
3				477	545	378	3859
4				4	8	10	5
1	YEL076C-A		930	31414	20678	17581	11625	Putative protein of unknown function	chrV	4185	5114
2				50	113	99	64
3				5282	5024	2951	2690
4				11	42	33	19
1	YER003C	PMI40	1383	0	73	7	0	Mannose-6-phosphate isomerase; catalyzes the interconversion of fructose-6-P and mannose-6-P; required for early steps in protein mannosylation	chrV	157736	159118
2				0	1	2	0
3				0	0	0	0
4				0	0	0	0
1	YER007C-A	TMA20	649	7575	2597	1591	897	Protein of unknown function that associates with ribosomes; has a putative RNA binding domain; interacts with Tma22p; null mutant exhibits translation defects; has homology to human oncogene MCT-1; protein abundance increases in response to DNA replication stress	chrV	166237	166885
2				11	29	20	11
3				2013	269	1022	195
4				1	5	7	3
1	YER014C-A	BUD25	970	0	28	0	0	Protein involved in bud-site selection; diploid mutants display a random budding pattern instead of the wild-type bipolar pattern	chrV	183731	184700
2				0	1	0	0
3				20971	9376	13324	6001
4				25	59	54	30
1	YER044C-A	MEI4	1315	12637	9367	6966	6677	Meiosis-specific protein involved in forming DSBs; involved in double-strand break (DSBs) formation during meiotic recombination; required for chromosome synapsis and production of viable spores	chrV	238460	239774
2				43	104	77	68
3				216	0	2	2
4				2	0	1	1
1	YER056C-A	RPL34A	763	1157	2888	1586	11176	Ribosomal 60S subunit protein L34A; homologous to mammalian ribosomal protein L34, no bacterial homolog; RPL34A has a paralog, RPL34B, that arose from the whole genome duplication	chrV	269423	270185
2				15	39	36	34
3				1275	528	343	3692
4				8	19	16	22
1	YER074W	RPS24A	874	1061	3163	724	593	Protein component of the small (40S) ribosomal subunit; homologous to mammalian ribosomal protein S24, no bacterial homolog; RPS24A has a paralog, RPS24B, that arose from the whole genome duplication	chrV	306323	307196
2				8	15	9	7
3				0	3	0	0
4				0	1	0	0
1	YER074W-A	YOS1	471	0	5	13	1	Integral membrane protein required for ER to Golgi transport; localized to the Golgi, the ER, and COPII vesicles; interacts with Yip1p and Yif1p	chrV	307653	308123
2				0	2	2	1
3				0	0	0	0
4				0	0	0	0
1	YER093C-A	AIM11	489	1855	1272	1929	878	Protein of unknown function; null mutant is viable but shows increased loss of mitochondrial genome and synthetic interaction with prohibitin (phb1); contains an intron; SWAT-GFP and mCherry fusion proteins localize to the mitochondria; YER093C-A has a paralog, YBL059W, that arose from the whole genome duplication	chrV	347912	348400
2				16	24	21	13
3				0	76	64	0
4				0	2	3	0
1	YER117W	RPL23B	885	21	100	78	3312	Ribosomal 60S subunit protein L23B; homologous to mammalian ribosomal protein L23 and bacterial L14; RPL23B has a paralog, RPL23A, that arose from the whole genome duplication	chrV	396769	397653
2				2	6	2	7
3				0	1	0	5
4				0	1	0	1
1	YER133W	GLC7	1464	0	1	0	0	Type 1 S/T protein phosphatase (PP1) catalytic subunit; involved in glycogen metabolism, sporulation and mitotic progression; interacts with multiple regulatory subunits; regulates actomyosin ring formation; subunit of CPF; recruited to mating projections by Afr1p interaction; regulates nucleocytoplasmic shuttling of Hxk2p; import into the nucleus is inhibited during spindle assembly checkpoint a…	chrV	432495	433958
2				0	1	0	0
3				0	0	3	0
4				0	0	1	0
1	YER179W	DMC1	1097	15346	20883	14165	12100	Meiosis-specific recombinase required for double-strand break repair; also required for pairing between homologous chromosomes; required for the normal morphogenesis of synaptonemal complex; homolog of Rad51p and the bacterial RecA protein; binds ssDNA and dsDNA, forms helical filaments; stimulated by Rdh54p	chrV	548421	549517
2				35	86	68	33
3				0	1798	877	92
4				0	1	4	3
1	YFL031W	HAC1	969	938	5211	2387	257	Basic leucine zipper (bZIP) transcription factor (ATF/CREB1 homolog); regulates the unfolded protein response, via UPRE binding, and membrane biogenesis; ER stress-induced splicing pathway facilitates efficient Hac1p synthesis; two functional forms of Hac1p are produced; translation initiation is repressed under non-stress conditions; protein abundance increases in response to DNA replication str…	chrVI	75179	76147
2				10	53	32	17
3				135	387	116	74
4				3	11	5	2
1	YFL034C-A	RPL22B	690	2023	4343	2931	2243	Ribosomal 60S subunit protein L22A; required for translation of long 5' UTR of IME1 mRNA and meiotic entry; homologous to mammalian ribosomal protein L22, no bacterial homolog; RPL22B has a paralog, RPL22A, that arose from the whole genome duplication	chrVI	64243	64932
2				10	37	34	14
3				780	590	1801	541
4				4	15	20	9
1	YFL034C-B	MOB2	978	0	248	57	164	Activator of Cbk1p kinase; component of the RAM signaling network that regulates cellular polarity and morphogenesis; activation of Cbk1p facilitates the Ace2p-dependent daughter cell-specific transcription of genes involved in cell separation; similar to Mob1p	chrVI	63016	63993
2				0	13	11	8
3				33	216	55	119
4				1	8	5	1
1	YFL039C	ACT1	1437	0	0	0	0	Actin; structural protein involved in cell polarization, endocytosis, and other cytoskeletal functions	chrVI	53260	54696
2				0	0	0	0
3				0	0	0	0
4				0	0	0	0
1	YFR024C-A	LSB3	1474	1198	1348	1637	1980	Protein containing a C-terminal SH3 domain; binds Las17p, which is a homolog of human Wiskott-Aldrich Syndrome protein involved in actin patch assembly and actin polymerization; protein abundance increases in response to DNA replication stress; LSB3 has a paralog, YSC84, that arose from the whole genome duplication	chrVI	201960	203433
2				13	36	41	24
3				10	30	2	17
4				1	1	1	1
1	YFR031C-A	RPL2A	912	21693	8465	10391	33486	Ribosomal 60S subunit protein L2A; homologous to mammalian ribosomal protein L2 and bacterial L2; RPL2A has a paralog, RPL2B, that arose from the whole genome duplication	chrVI	220507	221418
2				34	75	74	66
3				3197	1996	3730	7129
4				13	20	20	20
1	YFR045W		1002	13703	2384	1677	3288	Putative mitochondrial transport protein; null mutant is viable, exhibits decreased levels of chitin and normal resistance to calcofluor white	chrVI	241998	242999
2				11	33	23	14
3				0	0	150	0
4				0	0	2	0
1	YGL030W	RPL30	548	5	1	0	0	Ribosomal 60S subunit protein L30; involved in pre-rRNA processing in the nucleolus; autoregulates splicing of its transcript; homologous to mammalian ribosomal protein L30, no bacterial homolog	chrVII	439091	439638
2				1	1	0	0
3				0	0	0	0
4				0	0	0	0
1	YGL033W	HOP2	777	686	988	521	450	Meiosis-specific protein that localizes to chromosomes; prevents synapsis between nonhomologous chromosomes and ensures synapsis between homologs; complexes with Mnd1p to promote homolog pairing and meiotic double-strand break repair; heterodimer of Hop2p-Mnd1p stimulates the Dmc1p-mediated strand invasion	chrVII	435625	436401
2				6	19	15	10
3				114	190	109	0
4				1	2	2	0
1	YGL076C	RPL7A	1662	10229	5291	4811	1868	Ribosomal 60S subunit protein L7A; required for processing of 27SA3 pre-rRNA to 27SB pre-rRNA during assembly of large ribosomal subunit; depletion leads to a turnover of pre-rRNA; contains a conserved C-terminal Nucleic acid Binding Domain (NDB2); binds to Domain II of 25S and 5.8S rRNAs; homologous to mammalian ribosomal protein L7 and bacterial L30; RPL7A has a paralog, RPL7B, that arose from …	chrVII	364335	365996
2				20	40	34	21
3				6	13	11	5
4				1	4	3	2
1	YGL087C	MMS2	499	36	109	236	108	Ubiquitin-conjugating enzyme variant; involved in error-free postreplication repair; forms a heteromeric complex with Ubc13p, an active ubiquitin-conjugating enzyme; cooperates with chromatin-associated RING finger proteins, Rad18p and Rad5p; protein abundance increases in response to DNA replication stress	chrVII	346406	346904
2				3	9	11	7
3				0	15	7	0
4				0	2	4	0
1	YGL103W	RPL28	961	0	8	39	40	Ribosomal 60S subunit protein L28; homologous to mammalian ribosomal protein L27A and bacterial L15; may have peptidyl transferase activity; can mutate to cycloheximide resistance	chrVII	310967	311927
2				0	1	2	2
3				0	8	1	0
4				0	2	1	0
1	YGL137W	SEC27	2870	303	1017	614	75	Essential beta'-coat protein of the COPI coatomer; involved in ER-to-Golgi and Golgi-to-ER transport; contains WD40 domains that mediate cargo selective interactions; 45% sequence identity to mammalian beta'-COP	chrVII	249869	252738
2				3	14	13	3
3				0	0	5	0
4				0	0	1	0
1	YGL178W	MPT5	3220	830	476	934	2654	mRNA-binding protein of the PUF family; binds to specific mRNAs, often in the 3' UTR; has broad specificity and binds to more than 1000 mRNAs (16% of the transcriptome); recruits the CCR4-NOT deadenylase complex to mRNAs along with Dhh1p and Dcp1p to promote deadenylation, decapping, and decay; also interacts with the Caf20p translational initiation repressor, affecting its mRNA target specificity	chrVII	167352	170571
2				9	19	23	22
3				862	683	385	3791
4				15	43	33	45
1	YGL183C	MND1	743	1652	5150	6201	1835	Protein required for recombination and meiotic nuclear division; forms a complex with Hop2p, which is involved in chromosome pairing and repair of meiotic double-strand breaks	chrVII	156543	157285
2				16	56	61	22
3				288	1413	1583	74
4				1	13	13	3
1	YGL226C-A	OST5	410	30	239	92	166	Zeta subunit of the oligosaccharyltransferase complex of the ER lumen; complex catalyzes asparagine-linked glycosylation of newly synthesized proteins	chrVII	72749	73158
2				1	9	5	3
3				149	650	315	262
4				4	6	8	3
1	YGL232W	TAN1	928	0	170	11	0	Putative tRNA acetyltransferase; RNA-binding protein required for the formation of the modified nucleoside N(4)-acetylcytidine in serine and leucine tRNAs but not required for the same modification in 18S rRNA; protein abundance increases in response to DNA replication stress	chrVII	62075	63002
2				0	7	3	0
3				0	66	0	33
4				0	2	0	2
1	YGL251C	HFM1	3716	19753	22663	21024	9629	Meiosis specific DNA helicase; involved in the conversion of double-stranded breaks to later recombination intermediates and in crossover control; catalyzes the unwinding of Holliday junctions; has ssDNA and dsDNA stimulated ATPase activity	chrVII	27921	31636
2				48	136	114	68
3				1406	4995	3760	1223
4				5	13	12	8
1	YGR001C	EFM5	902	15650	9837	8566	6066	S-adenosylmethionine-dependent lysine methyltransferase; involved in the trimethylation of eEF1A (Tef1p/Tef2p) at lysine 79; green fluorescent protein (GFP)-fusion protein localizes to the cytoplasm; required for replication of Brome mosaic virus in budding yeast; expresses a circular RNA; originally misclassified as a N-6-adenine specific DNA methyltransferase based on sequence similarity; both …	chrVII	497133	498034
2				40	87	89	62
3				1740	1150	1731	897
4				11	17	17	16
1	YGR029W	ERV1	653	17	3	0	0	Flavin-linked sulfhydryl oxidase of the mitochondrial IMS; N-terminus is an intrinsically disordered domain that in the cytosol helps target Erv1p to mitochondria, and in the intermembrane space oxidizes Mia40p as part of a disulfide relay system that promotes intermembrane space retention of imported proteins; functional ortholog of human GFER (ALR); human GFER carrying N-terminal 21 amino acids…	chrVII	543553	544205
2				1	1	0	0
3				0	0	0	0
4				0	0	0	0
1	YGR034W	RPL26B	861	43	231	262	205	Ribosomal 60S subunit protein L26B; binds to 5.8S rRNA; non-essential even when paralog is also deleted; deletion has minimal affections on ribosome biosynthesis; homologous to mammalian ribosomal protein L26 and bacterial L24; RPL26B has a paralog, RPL26A, that arose from the whole genome duplication	chrVII	555812	556672
2				3	18	17	7
3				786	741	1835	278
4				6	22	20	9
1	YGR118W	RPS23A	757	1938	3678	1129	475	Ribosomal protein 28 (rp28) of the small (40S) ribosomal subunit; required for translational accuracy; homologous to mammalian ribosomal protein S23 and bacterial S12; RPS23A has a paralog, RPS23B, that arose from the whole genome duplication; deletion of both RPS23A and RPS23B is lethal	chrVII	726974	727730
2				7	48	33	15
3				21	618	219	122
4				3	18	12	6
1	YGR183C	QCR9	414	1238	1686	710	88	Subunit 9 of ubiquinol cytochrome-c reductase (Complex III); Complex III is a component of the mitochondrial inner membrane electron transport chain; required for electron transfer at the ubiquinol oxidase site of the complex	chrVII	859063	859476
2				7	10	11	4
3				1156	101	1	62
4				10	9	1	6
1	YGR214W	RPS0A	1214	122	344	155	99	Ribosomal 40S subunit protein S0A; required for maturation of 18S rRNA along with Rps0Bp; deletion of either RPS0 gene reduces growth rate, deletion of both genes is lethal; homologous to human ribosomal protein SA and bacterial S2; RPS0A has a paralog, RPS0B, that arose from the whole genome duplication;	chrVII	920575	921788
2				6	21	17	10
3				0	40	18	5
4				0	9	8	1
1	YGR225W	AMA1	1875	7102	3414	5963	2166	Activator of meiotic anaphase promoting complex (APC/C); Cdc20p family member; required for initiation of spore wall assembly; required for Clb1p degradation during meiosis; prevents premature assembly of the meiosis I spindle, required for DSB induced prophase I arrest	chrVII	945145	947019
2				13	51	41	16
3				0	9	12	27
4				0	2	1	2
1	YGR296W	YRF1-3	5728	395960	397203	344365	253813	Helicase encoded by the Y' element of subtelomeric regions; highly expressed in the mutants lacking the telomerase component TLC1; potentially phosphorylated by Cdc28p	chrVII	1084864	1090591
2				507	1125	965	688
3				8902	10642	7522	11102
4				13	26	20	15
1	YHL001W	RPL14B	815	3560	6238	4521	19983	Ribosomal 60S subunit protein L14B; homologous to mammalian ribosomal protein L14, no bacterial homolog; RPL14B has a paralog, RPL14A, that arose from the whole genome duplication; protein abundance increases in response to DNA replication stress	chrVIII	104277	105091
2				15	34	37	39
3				4398	5038	6634	21863
4				19	41	42	46
1	YHL050C		2867	45692	41276	31348	23981	Putative protein of unknown function; potential Cdc28p substrate	chrVIII	445	3311
2				121	233	203	140
3				10193	5823	6629	3378
4				25	55	47	39
1	YHR001W-A	QCR10	297	50081	9120	5906	2927	Subunit of the ubiqunol-cytochrome c oxidoreductase complex; this complex comprises part of the mitochondrial respiratory chain; members include Cobp, Rip1p, Cyt1p, Cor1p, Qcr2p, Qcr6p, Qcr7p, Qcr8p, Qcr9p, and Qcr10p and comprises part of the mitochondrial respiratory chain	chrVIII	107826	108122
2				16	30	34	23
3				1578	1172	808	688
4				7	15	13	11
1	YHR010W	RPL27A	972	0	0	0	0	Ribosomal 60S subunit protein L27A; homologous to mammalian ribosomal protein L27, no bacterial homolog; RPL27A has a paralog, RPL27B, that arose from the whole genome duplication	chrVIII	126521	127492
2				0	0	0	0
3				0	0	0	0
4				0	0	0	0
1	YHR012W	VPS29	968	0	1	0	26	Subunit of the membrane-associated retromer complex; endosomal protein; essential for endosome-to-Golgi retrograde transport; forms a subcomplex with Vps35p and Vps26p that selects cargo proteins for endosome-to-Golgi retrieval	chrVIII	129481	130448
2				0	1	0	4
3				0	0	2	0
4				0	0	1	0
1	YHR016C	YSC84	1575	7570	3149	2954	3067	Actin-binding protein; involved in bundling of actin filaments and endocytosis of actin cortical patches; activity stimulated by Las17p; contains SH3 domain similar to Rvs167p; YSC84 has a paralog, LSB3, that arose from the whole genome duplication	chrVIII	136881	138455
2				23	48	47	27
3				911	588	895	24
4				3	9	7	2
1	YHR021C	RPS27B	799	0	0	0	0	Protein component of the small (40S) ribosomal subunit; homologous to mammalian ribosomal protein S27, no bacterial homolog; RPS27B has a paralog, RPS27A, that arose from the whole genome duplication	chrVIII	147871	148669
2				0	0	0	0
3				0	4	0	0
4				0	1	0	0
1	YHR039C-A	VMA10	507	0	121	221	6	Subunit G of the V1 peripheral membrane domain of V-ATPase; part of the electrogenic proton pump found throughout the endomembrane system; involved in vacuolar acidification; the V1 peripheral membrane domain of the vacuolar H+-ATPase (V-ATPase) has eight subunits	chrVIII	187173	187679
2				0	2	3	2
3				0	0	1	0
4				0	0	1	0
1	YHR041C	SRB2	734	0	35	9	6	Subunit of the RNA polymerase II mediator complex; associates with core polymerase subunits to form the RNA polymerase II holoenzyme; general transcription factor involved in telomere maintenance	chrVIII	189131	189864
2				0	2	1	1
3				0	0	0	1
4				0	0	0	1
1	YHR076W	PTC7	1125	4067	1667	2148	2131	Type 2C serine/threonine protein phosphatase (PP2C); alternatively spliced to create two mRNA isoforms; protein from spliced form localizes to the mitochondria while the one from the unspliced form is localized to the nuclear envelope; activates coenzyme Q6 biosynthesis by dephosphorylation of demethoxy-Q6 hydroxylase Coq7p	chrVIII	251101	252225
2				10	28	31	17
3				77	2	29	10
4				2	2	3	3
1	YHR077C	NMD2	3383	4966	9101	14005	13684	Protein involved in the nonsense-mediated mRNA decay (NMD) pathway; interacts with Nam7p and Upf3p; involved in telomere maintenance	chrVIII	252374	255756
2				22	98	89	74
3				580	1228	1905	603
4				5	18	8	4
1	YHR079C-A	SAE3	362	360	305	181	552	Meiosis-specific protein involved in meiotic recombination; involved in DMC1-dependent meiotic recombination; forms heterodimer with Mei5p; proposed to be an assembly factor for Dmc1p	chrVIII	262192	262553
2				2	7	3	3
3				0	4	1	46
4				0	1	1	1
1	YHR097C		1225	7421	10930	9880	3243	Putative protein of unknown function; green fluorescent protein (GFP)-fusion protein localizes to the cytoplasm and the nucleus; YHR097C has a paralog, PAL1, that arose from the whole genome duplication	chrVIII	297385	298609
2				34	78	70	34
3				1232	739	1322	472
4				5	14	13	6
1	YHR101C	BIG1	1095	133	247	354	7	Integral membrane protein of the endoplasmic reticulum; required for normal content of cell wall beta-1,6-glucan	chrVIII	314874	315968
2				3	7	6	3
3				0	0	0	0
4				0	0	0	0
1	YHR123W	EPT1	1267	4526	8121	6524	2824	sn-1,2-diacylglycerol ethanolamine- and cholinephosphotranferase; not essential for viability; EPT1 has a paralog, CPT1, that arose from the whole genome duplication	chrVIII	354815	356081
2				26	75	55	38
3				1158	441	136	6
4				8	12	5	2
1	YHR199C-A	NBL1	289	776	575	344	630	Subunit of the conserved chromosomal passenger complex (CPC); complex regulates mitotic chromosome segregation; not required for the kinase activity of the complex; mediates the interaction of Sli15p and Bir1p; other complex members are Ipl1p, Sli15p, and Bir1p	chrVIII	498571	498859
2				7	4	12	3
3				28	11	37	2
4				2	3	7	1
1	YHR203C	RPS4B	1055	7040	11229	4144	3984	Protein component of the small (40S) ribosomal subunit; homologous to mammalian ribosomal protein S4, no bacterial homolog; RPS4B has a paralog, RPS4A, that arose from the whole genome duplication	chrVIII	504476	505530
2				34	97	76	63
3				818	3575	1162	721
4				7	21	18	14
1	YHR218W		1911	284330	260681	234966	169564	Helicase-like protein encoded within the telomeric Y' element	chrVIII	558014	559924
2				209	406	369	259
3				3282	3046	2912	1476
4				9	19	16	9
1	YIL004C	BET1	560	0	0	0	0	Type II membrane protein required for vesicular transport; required for vesicular transport between the endoplasmic reticulum and Golgi complex; v-SNARE with similarity to synaptobrevins	chrIX	347946	348505
2				0	0	0	0
3				0	0	0	0
4				0	0	0	0
1	YIL018W	RPL2B	1165	1576	953	1413	3576	Ribosomal 60S subunit protein L2B; homologous to mammalian ribosomal protein L2 and bacterial L2; RPL2B has a paralog, RPL2A, that arose from the whole genome duplication; expression is upregulated at low temperatures	chrIX	316768	317932
2				15	17	17	19
3				0	20	4	0
4				0	5	1	0
1	YIL052C	RPL34B	838	174	67	177	980	Ribosomal 60S subunit protein L34B; homologous to mammalian ribosomal protein L34, no bacterial homolog; RPL34B has a paralog, RPL34A, that arose from the whole genome duplication	chrIX	256226	257063
2				3	6	4	4
3				12	7	11	2
4				1	2	1	1
1	YIL069C	RPS24B	817	2247	4424	1402	1830	Protein component of the small (40S) ribosomal subunit; homologous to mammalian ribosomal protein S24, no bacterial homolog; RPS24B has a paralog, RPS24A, that arose from the whole genome duplication	chrIX	231553	232369
2				11	26	24	13
3				2444	2176	1193	238
4				7	24	26	10
1	YIL073C	SPO22	3018	4400	5952	4844	2915	Meiosis-specific protein essential for chromosome synapsis; involved in completion of nuclear divisions during meiosis; induced early in meiosis	chrIX	222937	225954
2				36	90	64	46
3				142	1	180	0
4				1	1	4	0
1	YIL106W	MOB1	1030	0	223	84	63	Component of the mitotic exit network; associates with and is required for the activation and Cdc15p-dependent phosphorylation of the Dbf2p kinase; required for cytokinesis and cell separation; component of the CCR4 transcriptional complex; relocalizes from cytoplasm to the nuclear periphery upon DNA replication stress	chrIX	166415	167444
2				0	4	4	1
3				0	0	0	0
4				0	0	0	0
1	YIL111W	COX5B	544	8957	902	1444	1088	Subunit Vb of cytochrome c oxidase; cytochrome c oxidase is the terminal member of the mitochondrial inner membrane electron transport chain; Cox5Bp is predominantly expressed during anaerobic growth while its isoform Va (Cox5Ap) is expressed during aerobic growth; COX5B has a paralog, COX5A, that arose from the whole genome duplication	chrIX	155222	155765
2				20	19	20	16
3				11680	2260	1128	516
4				10	10	10	8
1	YIL133C	RPL16A	890	14136	2798	6040	6342	Ribosomal 60S subunit protein L16A; N-terminally acetylated, binds 5.8 S rRNA; transcriptionally regulated by Rap1p; homologous to mammalian ribosomal protein L13A and bacterial L13; RPL16A has a paralog, RPL16B, that arose from the whole genome duplication; protein abundance increases in response to DNA replication stress	chrIX	98527	99416
2				15	42	39	33
3				4646	4450	4926	6415
4				12	37	27	29
1	YIL148W	RPL40A	821	19	952	74	348	Ubiquitin-ribosomal 60S subunit protein L40A fusion protein; cleaved to yield ubiquitin and ribosomal protein L40A; ubiquitin may facilitate assembly of the ribosomal protein into ribosomes; homologous to mammalian ribosomal protein L40, no bacterial homolog; RPL40A has a paralog, RPL40B, that arose from the whole genome duplication; relative distribution to the nucleus increases upon DNA replica…	chrIX	68708	69528
2				2	11	8	9
3				53	23	38	18
4				3	6	4	2
1	YIL156W-B		284	11901	5954	9160	4970	Putative protein of unknown function; originally identified based on homology to <i>Ashbya gossypii</i> and other related yeasts; SWAT-GFP and mCherry fusion proteins localize to the vacuole, while SWAT-GFP fusion also localizes to the endoplasmic reticulum	chrIX	47690	47973
2				10	34	25	15
3				0	931	391	1141
4				0	4	4	3
1	YIL177C		5665	206433	227523	212995	140984	Putative Y' element ATP-dependent helicase	chrIX	483	6147
2				376	821	738	501
3				3273	13563	10976	6514
4				15	59	53	30
1	YJL001W	PRE3	764	3	6	0	0	Beta 1 subunit of the 20S proteasome; responsible for cleavage after acidic residues in peptides	chrX	435163	435926
2				1	3	0	0
3				0	34	0	437
4				0	1	0	1
1	YJL024C	APS3	662	0	93	204	300	Small subunit of the clathrin-associated adaptor complex AP-3; involved in vacuolar protein sorting; related to the sigma subunit of the mammalian clathrin AP-3 complex; suppressor of loss of casein kinase 1 function; protein abundance increases in response to DNA replication stress	chrX	395931	396592
2				0	8	14	5
3				0	10	31	7
4				0	2	4	1
1	YJL031C	BET4	1071	727	269	337	83	Alpha subunit of Type II geranylgeranyltransferase; required for vesicular transport between the endoplasmic reticulum and the Golgi; provides a membrane attachment moiety to Rab-like proteins Ypt1p and Sec4p	chrX	386368	387438
2				3	6	8	4
3				0	1	26	0
4				0	1	1	0
1	YJL041W	NSP1	2590	0	0	0	1	FG-nucleoporin component of central core of the nuclear pore complex; also part of the nuclear pore complex (NPC) nuclear basket; contributes directly to nucleocytoplasmic transport and maintenance of the NPC permeability barrier; found in stable complex with Nup82p, Gle2p and two other FG-nucleoporins (Nup159p and Nup116p); also found in stable complex with Nic96p and two other FG-nucleoproteins…	chrX	365784	368373
2				0	0	0	1
3				0	0	0	0
4				0	0	0	0
1	YJL136C	RPS21B	724	0	0	2	0	Protein component of the small (40S) ribosomal subunit; homologous to mammalian ribosomal protein S21, no bacterial homolog; RPS21B has a paralog, RPS21A, that arose from the whole genome duplication	chrX	156550	157273
2				0	0	2	0
3				65	9	17	1
4				2	2	7	1
1	YJL177W	RPL17B	872	1529	2288	2060	5171	Ribosomal 60S subunit protein L17B; required for processing of 27SB pre-rRNA and formation of stable 66S assembly intermediates; homologous to mammalian ribosomal protein L17 and bacterial L22; RPL17B has a paralog, RPL17A, that arose from the whole genome duplication	chrX	90786	91657
2				14	24	26	23
3				727	721	1666	954
4				3	10	14	10
1	YJL189W	RPL39	542	0	0	0	0	Ribosomal 60S subunit protein L39; required for ribosome biogenesis; loss of both Rpl31p and Rpl39p confers lethality; also exhibits genetic interactions with SIS1 and PAB1; homologous to mammalian ribosomal protein L39, no bacterial homolog	chrX	75933	76474
2				0	0	0	0
3				0	2	0	610
4				0	2	0	1
1	YJL191W	RPS14B	825	19072	30321	21731	39513	Protein component of the small (40S) ribosomal subunit; required for ribosome assembly and 20S pre-rRNA processing; mutations confer cryptopleurine resistance; homologous to mammalian ribosomal protein S14 and bacterial S11; RPS14B has a paralog, RPS14A, that arose from the whole genome duplication	chrX	73787	74611
2				36	69	66	60
3				11174	18218	16602	13960
4				34	66	61	39
1	YJL205C	NCE101	305	3007	2244	2582	402	Protein of unknown function; involved in secretion of proteins that lack classical secretory signal sequences; SWAT-GFP and mCherry fusion proteins localize to the cytosol	chrX	50139	50443
2				9	22	14	9
3				3	919	155	61
4				1	7	5	2
1	YJL225C		5665	206966	228902	214434	141535	Putative Y' element ATP-dependent helicase	chrX	466	6130
2				379	832	742	495
3				3296	13800	10859	6559
4				15	62	53	30
1	YJR021C	REC107	1025	2777	2019	862	165	Protein involved in early stages of meiotic recombination; involved in coordination between the initiation of recombination and the first division of meiosis; part of a complex (Rec107p-Mei4p-Rec114p) required for ds break formation	chrX	468555	469579
2				17	36	29	16
3				321	230	264	441
4				2	4	3	2
1	YJR079W		1035	13118	4894	4778	6563	Putative protein of unknown function; mutation results in impaired mitochondrial respiration	chrX	580205	581239
2				13	30	29	21
3				12201	3328	2639	2492
4				13	42	35	24
1	YJR094W-A	RPL43B	554	4674	13681	6835	15056	Ribosomal 60S subunit protein L43B; homologous to mammalian ribosomal protein L37A, no bacterial homolog; RPL43B has a paralog, RPL43A, that arose from the whole genome duplication; protein abundance increases in response to DNA replication stress	chrX	608305	608858
2				10	28	21	22
3				2451	2716	4975	5443
4				11	35	29	25
1	YJR112W-A		379	1687	2316	5697	2321	Putative protein of unknown function; SWAT-GFP and mCherry fusion proteins localize to the endoplasmic reticulum; identified based on homology to <i>Ashbya gossypii</i>	chrX	637790	638168
2				14	54	49	18
3				121	700	845	1015
4				3	10	8	5
1	YJR145C	RPS4A	1042	3412	5454	2059	1641	Protein component of the small (40S) ribosomal subunit; mutation affects 20S pre-rRNA processing; homologous to mammalian ribosomal protein S4, no bacterial homolog; RPS4A has a paralog, RPS4B, that arose from the whole genome duplication	chrX	702027	703068
2				21	73	58	44
3				61	428	145	84
4				3	12	7	6
1	YKL002W	DID4	767	0	4	5	0	Class E Vps protein of the ESCRT-III complex; required for sorting of integral membrane proteins into lumenal vesicles of multivesicular bodies, and for delivery of newly synthesized vacuolar enzymes to the vacuole, involved in endocytosis	chrXI	437778	438544
2				0	1	3	0
3				0	0	0	0
4				0	0	0	0
1	YKL006C-A	SFT1	435	0	0	0	0	Intra-Golgi v-SNARE; required for transport of proteins between an early and a later Golgi compartment	chrXI	430198	430632
2				0	0	0	0
3				134	105	3	0
4				1	2	1	0
1	YKL006W	RPL14A	815	143	2468	521	2549	Ribosomal 60S subunit protein L14A; N-terminally acetylated; homologous to mammalian ribosomal protein L14, no bacterial homolog; RPL14A has a paralog, RPL14B, that arose from the whole genome duplication	chrXI	431906	432720
2				2	9	9	14
3				0	3	2	0
4				0	1	1	0
1	YKL081W	TEF4	1565	6214	7176	6268	8100	Gamma subunit of translational elongation factor eEF1B; stimulates the binding of aminoacyl-tRNA (AA-tRNA) to ribosomes by releasing eEF1A (Tef1p/Tef2p) from the ribosomal complex	chrXI	282891	284455
2				32	64	71	36
3				711	2033	1755	473
4				9	22	19	13
1	YKL156W	RPS27A	600	229	624	571	679	Protein component of the small (40S) ribosomal subunit; homologous to mammalian ribosomal protein S27, no bacterial homolog; RPS27A has a paralog, RPS27B, that arose from the whole genome duplication; protein abundance increases in response to DNA replication stress	chrXI	158613	159212
2				3	11	11	9
3				1725	2009	679	509
4				9	18	14	8
1	YKL157W	APE2	3242	10457	10472	8536	4043	Aminopeptidase yscII; may have a role in obtaining leucine from dipeptide substrates; APE2 has a paralog, AAP1, that arose from the whole genome duplication	chrXI	154991	158232
2				40	112	106	51
3				5711	6406	5088	2749
4				29	57	49	36
1	YKL180W	RPL17A	861	102	39	66	9	Ribosomal 60S subunit protein L17A; required for processing of 27SB pre-rRNA and formation of stable 66S assembly intermediates; copurifies with the Dam1 complex (aka DASH complex); homologous to mammalian ribosomal protein L17 and bacterial L22; RPL17A has a paralog, RPL17B, that arose from the whole genome duplication; protein abundance increases in response to DNA replication stress	chrXI	109269	110129
2				2	2	2	1
3				0	0	0	0
4				0	0	0	0
1	YKL190W	CNB1	604	0	2	0	0	Calcineurin B; regulatory subunit of calcineurin, a Ca++/calmodulin-regulated type 2B protein phosphatase which regulates Crz1p (stress-response transcription factor); other calcineurin subunit encoded by CNA1 and/or CMP1; regulates function of Aly1p alpha-arrestin; myristoylation by Nmt1p reduces calcineurin activity in response to submaximal Ca signals, is needed to prevent constitutive phospha…	chrXI	82947	83550
2				0	1	0	0
3				0	0	0	0
4				0	0	0	0
1	YKR004C	ECM9	1238	34	10	0	3	Non-essential protein of unknown function	chrXI	446799	448036
2				1	3	0	1
3				0	0	0	0
4				0	0	0	0
1	YKR005C		1647	20243	12647	20843	13480	Putative protein of unknown function	chrXI	448521	450167
2				69	153	153	77
3				310	191	589	408
4				4	5	5	4
1	YKR057W	RPS21A	586	177	405	221	10	Protein component of the small (40S) ribosomal subunit; homologous to mammalian ribosomal protein S21, no bacterial homolog; RPS21A has a paralog, RPS21B, that arose from the whole genome duplication	chrXI	551657	552242
2				4	15	11	1
3				31	130	98	24
4				3	12	9	3
1	YKR094C	RPL40B	755	3535	3221	2385	8742	Ubiquitin-ribosomal 60S subunit protein L40B fusion protein; cleaved to yield ubiquitin and ribosomal protein L40B; ubiquitin may facilitate assembly of the ribosomal protein into ribosomes; homologous to mammalian ribosomal protein L40, no bacterial homolog; RPL40B has a paralog, RPL40A, that arose from the whole genome duplication	chrXI	617996	618750
2				9	32	28	32
3				1680	2102	2651	7100
4				5	31	29	30
1	YKR095W-A	PCC1	342	101	25	46	738	Component of the EKC/KEOPS protein complex; EKC/KEOPS complex is required for t6A tRNA modification and telomeric TG1-3 recombination; may have role in transcription; other complex members are Kae1p, Gon7p, Bud32p, and Cgi121p	chrXI	625864	626205
2				1	4	3	2
3				0	15	0	0
4				0	1	0	0
1	YLL050C	COF1	611	427	94	581	28	Cofilin, involved in pH-dependent actin filament depolarization; binds both actin monomers and filaments and severs filaments; involved in the selective sorting, export of the secretory cargo from the late golgi; genetically interacts with pmr1; thought to be regulated by phosphorylation at SER4; ubiquitous and essential in eukaryotes	chrXII	39804	40414
2				2	2	1	1
3				0	0	0	0
4				0	0	0	0
1	YLL066C		3717	289615	261396	242781	163638	Putative Y' element ATP-dependent helicase; YLL066C is not an essential gene	chrXII	6120	9836
2				271	560	482	346
3				3298	3100	2934	1441
4				8	19	16	8
1	YLL067C		3717	285685	255859	237066	162640	Putative Y' element ATP-dependent helicase	chrXII	585	4301
2				249	501	444	319
3				3236	3067	2894	1479
4				9	20	16	9
1	YLR048W	RPS0B	1118	0	243	246	0	Protein component of the small (40S) ribosomal subunit; RPS0B has a paralog, RPS0A, that arose from the whole genome duplication; required for maturation of 18S rRNA along with Rps0Ap; deletion of either RPS0 gene reduces growth rate, deletion of both genes is lethal; homologous to human ribosomal protein SA and bacterial S2	chrXII	242232	243349
2				0	6	3	0
3				0	69	0	0
4				0	3	0	0
1	YLR054C	OSW2	2262	22586	15359	28470	6934	Protein of unknown function reputedly involved in spore wall assembly	chrXII	248717	250978
2				63	121	137	66
3				0	0	0	116
4				0	0	0	2
1	YLR061W	RPL22A	755	380	362	265	2688	Ribosomal 60S subunit protein L22A; required for translation of long 5' UTR of IME1 mRNA and meiotic entry; required for the oxidative stress response, pseudohyphal and invasive growth; homologous to mammalian ribosomal protein L22, no bacterial homolog; RPL22A has a paralog, RPL22B, that arose from the whole genome duplication	chrXII	263194	263948
2				9	11	19	14
3				94	62	100	1
4				3	8	11	1
1	YLR078C	BOS1	824	0	94	1	2	v-SNARE (vesicle specific SNAP receptor); localized to the endoplasmic reticulum membrane and necessary for vesicular transport from the ER to the Golgi; required for efficient nuclear fusion during mating	chrXII	285736	286559
2				0	3	1	1
3				0	77	105	8
4				0	2	4	1
1	YLR093C	NYV1	903	4514	1854	2272	1111	v-SNARE component of the vacuolar SNARE complex; involved in vesicle fusion; inhibits ATP-dependent Ca(2+) transport activity of Pmc1p in the vacuolar membrane	chrXII	326513	327415
2				18	30	30	12
3				123	352	434	629
4				3	7	6	5
1	YLR128W	DCN1	904	392	1301	618	272	Scaffold-type E3 ligase; required for cullin neddylation and ubiquitin ligase activation; contains a ubiquitin-binding domain (UBA) for ubiquitin and Nedd8 (Rub1p) interaction and a PONY domain involved in cullin binding and neddylation	chrXII	398530	399433
2				4	23	14	8
3				0	0	0	6
4				0	0	0	1
1	YLR185W	RPL37A	626	519	2111	3732	2630	Ribosomal 60S subunit protein L37A; required for processing of 27SB pre-rRNA and formation of stable 66S assembly intermediates; homologous to mammalian ribosomal protein L37, no bacterial homolog; RPL37A has a paralog, RPL37B, that arose from the whole genome duplication	chrXII	522663	523288
2				5	39	29	31
3				4714	2646	2823	2020
4				15	21	21	17
1	YLR199C	PBA1	917	1006	6830	14015	12338	Protein involved in 20S proteasome assembly; forms a heterodimer with Add66p that binds to proteasome precursors; interaction with Pba1p-Add66p may affect function of the mature proteasome and its role in maintaining respiratory metabolism; similar to human PAC1 constituent of the PAC1-PAC2 complex involved in proteasome assembly	chrXII	547853	548769
2				8	45	43	35
3				0	83	0	11
4				0	1	0	1
1	YLR202C		443	6859	2552	650	590	Dubious open reading frame; unlikely to encode a functional protein, based on available experimental and comparative sequence data; partially overlaps the verified ORF YLR201C; ORF contains a putative intron	chrXII	550194	550636
2				16	25	16	12
3				7146	2903	2417	1400
4				9	13	11	9
1	YLR211C	ATG38	740	1471	2413	2269	1722	Homodimeric subunit of autophagy-specific PtdIns-3-kinase complex I; required for the integrity of the active PtdIns-3-kinase complex I by maintaining an association between Vps15p-Vps34p and Atg14p-Vps30p subcomplexes; localizes to the pre-autophagosomal structure (PAS) in an Atg14p-dependent manner; ATG38 is non-essential but is required for macroautophagy	chrXII	563792	564531
2				3	19	16	11
3				665	801	736	439
4				2	3	4	4
1	YLR275W	SMD2	423	0	0	0	1	Core Sm protein Sm D2; part of heteroheptameric complex (with Smb1p, Smd1p, Smd3p, Sme1p, Smx3p, and Smx2p) that is part of the spliceosomal U1, U2, U4, and U5 snRNPs; homolog of human Sm D2	chrXII	694378	694800
2				0	0	0	1
3				0	0	2	0
4				0	0	1	0
1	YLR287C-A	RPS30A	622	577	513	66	148	Protein component of the small (40S) ribosomal subunit; homologous to mammalian ribosomal protein S30, no bacterial homolog; RPS30A has a paralog, RPS30B, that arose from the whole genome duplication	chrXII	712537	713158
2				4	10	7	4
3				45	669	269	123
4				4	9	6	8
1	YLR306W	UBC12	701	0	403	3	4	Enzyme that mediates the conjugation of Rub1p; a ubiquitin-like protein, to other proteins; related to E2 ubiquitin-conjugating enzymes	chrXII	744151	744851
2				0	11	3	1
3				21	8055	9263	19
4				2	20	9	3
1	YLR316C	TAD3	1093	0	4	0	15	Subunit of tRNA-specific adenosine-34 deaminase; forms a heterodimer with Tad2p that converts adenosine to inosine at the wobble position of several tRNAs	chrXII	765266	766358
2				0	1	0	1
3				0	0	0	0
4				0	0	0	0
1	YLR329W	REC102	892	3141	3901	4054	3532	Protein involved in early stages of meiotic recombination; required for chromosome synapsis; forms a complex with Rec104p and Spo11p necessary during the initiation of recombination	chrXII	786442	787333
2				12	39	40	21
3				728	243	684	22
4				3	7	8	1
1	YLR344W	RPL26A	831	429	1682	1380	871	Ribosomal 60S subunit protein L26A; binds to 5.8S rRNA; non-essential even when paralog is also deleted; deletion has minimal affections on ribosome biosynthesis; homologous to mammalian ribosomal protein L26 and bacterial L24; RPL26A has a paralog, RPL26B, that arose from the whole genome duplication	chrXII	819312	820142
2				11	23	20	16
3				2406	2119	2320	1770
4				9	32	28	16
1	YLR367W	RPS22B	876	246	3657	1013	1209	Protein component of the small (40S) ribosomal subunit; homologous to mammalian ribosomal protein S15A and bacterial S8; RPS22B has a paralog, RPS22A, that arose from the whole genome duplication	chrXII	856442	857317
2				6	23	20	13
3				1373	1985	1120	1234
4				8	25	28	17
1	YLR406C	RPL31B	691	13205	16069	14168	6764	Ribosomal 60S subunit protein L31B; associates with karyopherin Sxm1p; loss of both Rpl31p and Rpl39p confers lethality; homologous to mammalian ribosomal protein L31, no bacterial homolog; RPL31B has a paralog, RPL31A, that arose from the whole genome duplication	chrXII	931065	931755
2				21	49	41	35
3				10186	11748	7437	4003
4				8	34	27	19
1	YLR426W	TDA5	1052	0	69	0	0	Putative protein of unknown function; detected in highly purified mitochondria in high-throughput studies; proposed to be involved in resistance to mechlorethamine and streptozotocin; null mutant sensitive to expression of top1-T722A allele	chrXII	987062	988113
2				0	2	0	0
3				0	0	0	0
4				0	0	0	0
1	YLR445W	GMC2	649	4944	5627	2582	1919	Protein involved in meiotic crossing over; component of the Synaptonemal Complex (SC) along with Ecm11p; required for the efficient loading of the SC transverse filament protein, Zip1p; promotes SUMOylation of Ecm11p; mutants are delayed in meiotic nuclear division and are defective in synaptonemal complex assembly; transcription is regulated by Ume6p and induced in response to alpha factor	chrXII	1024189	1024837
2				10	36	24	15
3				0	94	11	0
4				0	2	1	0
1	YLR448W	RPL6B	915	975	415	759	1967	Ribosomal 60S subunit protein L6B; binds 5.8S rRNA; homologous to mammalian ribosomal protein L6, no bacterial homolog; RPL6B has a paralog, RPL6A, that arose from the whole genome duplication	chrXII	1028854	1029768
2				6	18	19	18
3				10589	3129	4742	6139
4				17	32	38	35
1	YLR464W		930	31912	20739	17591	11697	Putative protein of unknown function; intron is predicted but not detected experimentally; YLR464W overlaps the verified gene YRF1-4/YLR466W and two dubious ORFs YLR463C and YLR465C	chrXII	1066572	1067501
2				56	124	104	65
3				5198	4484	2982	2302
4				11	37	34	15
1	YML017W	PSP2	2144	27	1144	1314	141	Asn rich cytoplasmic protein that contains RGG motifs; high-copy suppressor of group II intron-splicing defects of a mutation in MRS2 and of a conditional mutation in POL1 (DNA polymerase alpha); possible role in mitochondrial mRNA splicing	chrXIII	236588	238731
2				1	52	44	11
3				0	175	30	4
4				0	8	4	1
1	YML024W	RPS17A	809	2	15	31	2	Ribosomal protein 51 (rp51) of the small (40s) subunit; homologous to mammalian ribosomal protein S17, no bacterial homolog; RPS17A has a paralog, RPS17B, that arose from the whole genome duplication	chrXIII	225889	226697
2				1	7	6	1
3				18	25	4	0
4				1	5	1	0
1	YML025C	YML6	960	79	221	23	63	Mitochondrial ribosomal protein of the large subunit; has similarity to E. coli L4 ribosomal protein and human mitoribosomal MRP-L4 protein; essential for viability, unlike most other mitoribosomal proteins	chrXIII	224406	225365
2				3	3	3	6
3				164	4	1	69
4				4	1	1	3
1	YML026C	RPS18B	842	993	2941	1149	922	Protein component of the small (40S) ribosomal subunit; homologous to mammalian ribosomal protein S18 and bacterial S13; RPS18B has a paralog, RPS18A, that arose from the whole genome duplication; protein abundance increases in response to DNA replication stress	chrXIII	222987	223828
2				13	31	20	13
3				697	1379	732	426
4				6	24	25	13
1	YML034W	SRC1	2631	4892	4256	3047	2546	Inner nuclear membrane protein; highly enriched at telomeres and subtelomeric regions; functions in regulation of subtelomeric genes and is linked to TREX (transcription export) factors; SRC1 produces 2 splice variant proteins with different functions; alternative splicing of SRC1 pre-mRNA is promoted by Hub1p; mutant has aneuploidy tolerance; SEC1 has a paralog, HEH2, that arose from the whole g…	chrXIII	209525	212155
2				38	83	64	43
3				135	18	22	0
4				1	2	1	0
1	YML036W	CGI121	652	643	523	1445	218	Component of the EKC/KEOPS complex; EKC/KEOPS complex is required for t6A tRNA modification and telomeric TG1-3 recombination; may have role in transcription; Cgi121p is dispensable for tRNA modification; other complex members are Bud32p, Kae1p, Pcc1p, and Gon7p	chrXIII	205642	206293
2				7	16	9	12
3				0	0	3	0
4				0	0	1	0
1	YML056C	IMD4	1983	2498	6581	5396	5626	Inosine monophosphate dehydrogenase; catalyzes the rate-limiting step in the de novo synthesis of GTP; member of a four-gene family in S. cerevisiae, constitutively expressed; IMD4 has a paralog, IMD3, that arose from the whole genome duplication	chrXIII	162194	164176
2				29	104	69	62
3				29	613	54	173
4				3	14	9	3
1	YML067C	ERV41	1152	129	693	754	957	Protein localized to COPII-coated vesicles; forms a complex with Erv46p; involved in the membrane fusion stage of transport; has homology to human ERGIC2 (PTX1) protein	chrXIII	139063	140214
2				6	37	21	19
3				0	69	1	0
4				0	4	1	0
1	YML073C	RPL6A	946	138	72	11	35	Ribosomal 60S subunit protein L6A; N-terminally acetylated; binds 5.8S rRNA; homologous to mammalian ribosomal protein L6, no bacterial homolog; RPL6A has a paralog, RPL6B, that arose from the whole genome duplication	chrXIII	123227	124172
2				4	10	3	6
3				88	28	18	0
4				5	4	5	0
1	YML085C	TUB1	1460	197	49	41	6	Alpha-tubulin; associates with beta-tubulin (Tub2p) to form tubulin dimer, which polymerizes to form microtubules; relative distribution to nuclear foci increases upon DNA replication stress; TUB1 has a paralog, TUB3, that arose from the whole genome duplication	chrXIII	97941	99400
2				1	1	2	1
3				0	0	0	0
4				0	0	0	0
1	YML094W	GIM5	575	3918	4038	1933	2091	Subunit of the heterohexameric cochaperone prefoldin complex; prefoldin binds specifically to cytosolic chaperonin and transfers target proteins to it; prefoldin complex also localizes to chromatin of actively transcribed genes in the nucleus and facilitates transcriptional elongation	chrXIII	82275	82849
2				12	21	21	14
3				0	593	72	49
4				0	2	4	1
1	YML124C	TUB3	1636	4533	6309	7384	5685	Alpha-tubulin; associates with beta-tubulin (Tub2p) to form tubulin dimer, which polymerizes to form microtubules; expressed at lower level than Tub1p; TUB3 has a paralog, TUB1, that arose from the whole genome duplication	chrXIII	22048	23683
2				14	69	60	46
3				389	746	867	822
4				1	13	14	6
1	YML133C		4224	284863	263986	251795	170131	Putative Y' element ATP-dependent helicase; the authentic, non-tagged protein is detected in highly purified mitochondria in high-throughput studies; YML133C contains an intron	chrXIII	461	4684
2				324	624	544	384
3				3214	2177	2572	1255
4				7	19	15	8
1	YMR033W	ARP9	1490	0	0	0	0	Component of both the SWI/SNF and RSC chromatin remodeling complexes; actin-related protein involved in transcriptional regulation	chrXIII	337788	339277
2				0	0	0	0
3				0	0	0	3
4				0	0	0	1
1	YMR079W	SEC14	1071	170	63	74	192	Phosphatidylinositol/phosphatidylcholine transfer protein; involved in regulating PtdIns, PtdCho, and ceramide metabolism, products of which regulate intracellular transport and UPR; has a role in localization of lipid raft proteins; functionally homologous to mammalian PITPs; SEC14 has a paralog, YKL091C, that arose from the whole genome duplication	chrXIII	424989	426059
2				1	1	1	3
3				0	0	0	0
4				0	0	0	0
3				0	0	0	0
4				0	0	0	0
1	YMR125W	STO1	2908	116	325	230	13	Large subunit of the nuclear mRNA cap-binding protein complex; interacts with Npl3p to carry nuclear poly(A)+ mRNA to cytoplasm; also involved in nuclear mRNA degradation and telomere maintenance; orthologous to mammalian CBP80	chrXIII	517539	520446
2				2	25	25	3
3				135	5142	2382	1936
4				5	35	27	23
1	YMR133W	REC114	1403	1269	3719	2465	986	Protein involved in early stages of meiotic recombination; possibly involved in the coordination of recombination and meiotic division; mutations lead to premature initiation of the first meiotic division	chrXIII	536207	537609
2				13	47	28	28
3				10	939	126	584
4				1	9	7	4
1	YMR142C	RPL13B	1002	17	359	76	670	Ribosomal 60S subunit protein L13B; not essential for viability; homologous to mammalian ribosomal protein L13, no bacterial homolog; RPL13B has a paralog, RPL13A, that arose from the whole genome duplication	chrXIII	550206	551207
2				1	7	4	5
3				0	0	0	0
4				0	0	0	0
1	YMR143W	RPS16A	976	13	224	13	16	Protein component of the small (40S) ribosomal subunit; homologous to mammalian ribosomal protein S16 and bacterial S9; RPS16A has a paralog, RPS16B, that arose from the whole genome duplication	chrXIII	551928	552903
2				1	12	4	2
3				0	66	29	0
4				0	10	4	0
1	YMR194C-B	CMC4	294	10835	12493	7477	7295	Protein that localizes to the mitochondrial intermembrane space; localizes via the Mia40p-Erv1p system; contains twin cysteine-x(9)-cysteine motifs	chrXIII	652594	652887
2				24	58	44	34
3				452	426	753	391
4				1	5	3	5
1	YMR194W	RPL36A	766	1326	1073	1727	1430	Ribosomal 60S subunit protein L36A; N-terminally acetylated; binds to 5.8 S rRNA; homologous to mammalian ribosomal protein L36, no bacterial homolog; RPL36A has a paralog, RPL36B, that arose from the whole genome duplication	chrXIII	651145	651910
2				10	21	25	18
3				2066	5185	2494	5611
4				16	44	37	34
1	YMR201C	RAD14	1200	2331	1694	2130	3094	Protein that recognizes and binds damaged DNA during NER; subunit of Nucleotide Excision Repair Factor 1 (NEF1); contains zinc finger motif; homolog of human XPA protein; NER stands for nucleotide excision repair	chrXIII	665845	667044
2				24	45	52	27
3				221	377	220	365
4				2	4	2	3
1	YMR225C	MRPL44	444	593	791	382	52	Mitochondrial ribosomal protein of the large subunit; protein abundance increases in response to DNA replication stress	chrXIII	720960	721403
2				5	17	5	4
3				1845	274	4	11
4				3	4	1	1
1	YMR230W	RPS10B	728	730	1255	322	1307	Protein component of the small (40S) ribosomal subunit; homologous to mammalian ribosomal protein S10, no bacterial homolog; RPS10B has a paralog, RPS10A, that arose from the whole genome duplication; mutations in the human homolog associated with Diamond-Blackfan anemia	chrXIII	732414	733141
2				7	23	14	18
3				369	509	743	228
4				5	17	16	10
1	YMR242C	RPL20A	996	138	172	141	375	Ribosomal 60S subunit protein L20A; homologous to mammalian ribosomal protein L18A, no bacterial homolog; RPL20A has a paralog, RPL20B, that arose from the whole genome duplication	chrXIII	753225	754220
2				7	18	18	15
3				636	483	233	865
4				13	23	24	19
1	YMR292W	GOT1	499	194	1848	1404	1748	Homodimeric protein that is packaged into COPII vesicles; cycles between the ER and Golgi; involved in secretory transport but not directly required for aspects of transport assayed in vitro; may influence membrane composition	chrXIII	854795	855293
2				5	28	23	16
3				59	96	565	881
4				1	3	2	3
1	YNL004W	HRB1	1707	102845	48365	67917	58725	Poly(A+) RNA-binding protein; key surveillance factor for the selective export of spliced mRNAs from the nucleus to the cytoplasm; preference for intron-containing genes; similar to Npl3p; HRB1 has a paralog, GBP2, that arose from the whole genome duplication	chrXIV	622915	624621
2				99	177	160	132
3				10920	2594	3813	2725
4				13	17	13	14
1	YNL012W	SPO1	1980	8933	6243	5199	4013	Meiosis-specific prospore protein; required for meiotic spindle pole body duplication and separation; required to produce bending force necessary for proper prospore membrane assembly during sporulation; has similarity to phospholipase B	chrXIV	609686	611665
2				29	88	65	48
3				77	4	36	11
4				1	1	1	2
1	YNL038W	GPI15	764	0	6	19	1	Protein involved in the synthesis of GlcNAc-PI; GlcNAc-PI is the first intermediate in the synthesis of glycosylphosphatidylinositol (GPI) anchors; homologous to the human PIG-H protein; GlcNAc-PI stands for N-acetylglucosaminyl phosphatidylinositol	chrXIV	557020	557783
2				0	1	3	1
3				0	0	0	0
4				0	0	0	0
1	YNL044W	YIP3	610	334	2926	1379	1808	Protein localized to COPII vesicles; proposed to be involved in ER to Golgi transport; interacts with members of the Rab GTPase family and Yip1p; also interacts with Rtn1p	chrXIV	545268	545877
2				10	30	33	22
3				76	81	27	58
4				3	4	3	4
1	YNL050C		904	2103	2254	1429	866	Putative protein of unknown function; YNL050c is not an essential gene	chrXIV	534079	534982
2				10	19	13	8
3				1870	0	0	19
4				2	0	0	1
1	YNL069C	RPL16B	1046	7	16	98	228	Ribosomal 60S subunit protein L16B; N-terminally acetylated, binds 5.8 S rRNA; transcriptionally regulated by Rap1p; homologous to mammalian ribosomal protein L13A and bacterial L13; RPL16B has a paralog, RPL16A, that arose from the whole genome duplication	chrXIV	493956	495001
2				1	3	4	4
3				0	0	0	0
4				0	0	0	0
1	YNL096C	RPS7B	918	3505	3738	2140	2155	Protein component of the small (40S) ribosomal subunit; interacts with Kti11p; deletion causes hypersensitivity to zymocin; homologous to mammalian ribosomal protein S7, no bacterial homolog; RPS7B has a paralog, RPS7A, that arose from the whole genome duplication; protein abundance increases in response to DNA replication stress	chrXIV	443398	444315
2				11	42	38	25
3				1401	2902	3239	1605
4				10	22	22	13
1	YNL112W	DBP2	2643	868	938	1664	369	ATP-dependent RNA helicase of the DEAD-box protein family; has strong preference for dsRNA; interacts with YRA1; required for assembly of Yra1p, Nab2p and Mex67p onto mRNA and formation of nuclear mRNP; involved in mRNA decay and rRNA processing; may be involved in suppression of transcription from cryptic initiation sites	chrXIV	413639	416281
2				7	16	12	9
3				0	2	4	703
4				0	1	2	1
1	YNL130C	CPT1	1274	4093	4273	5872	4432	Cholinephosphotransferase; required for phosphatidylcholine biosynthesis and for inositol-dependent regulation of EPT1 transcription; CPT1 has a paralog, EPT1, that arose from the whole genome duplication	chrXIV	379558	380831
2				19	62	62	35
3				15	122	22	1956
4				2	4	4	3
1	YNL138W-A	YSF3	380	279	430	587	0	Component of the SF3b subcomplex of the U2 snRNP; essential protein required for splicing and for assembly of SF3b	chrXIV	366033	366412
2				3	5	3	0
3				0	0	0	2
4				0	0	0	1
1	YNL147W	LSM7	444	891	247	376	264	Lsm (Like Sm) protein; part of heteroheptameric complexes (Lsm2p-7p and either Lsm1p or 8p): cytoplasmic Lsm1p complex involved in mRNA decay; nuclear Lsm8p complex part of U6 snRNP and possibly involved in processing tRNA, snoRNA, and rRNA; protein abundance increases and forms cytoplasmic foci in response to DNA replication stress	chrXIV	350940	351383
2				3	3	4	3
3				28	0	62	0
4				2	0	2	0
1	YNL162W	RPL42A	833	249	496	466	1483	Ribosomal 60S subunit protein L42A; homologous to mammalian ribosomal protein L36A, no bacterial homolog; RPL42A has a paralog, RPL42B, that arose from the whole genome duplication	chrXIV	331322	332154
2				7	18	17	18
3				694	364	332	587
4				11	20	22	15
1	YNL246W	VPS75	890	502	318	323	51	NAP family histone chaperone; binds to histones and Rtt109p, stimulating histone acetyltransferase activity; possesses nucleosome assembly activity in vitro; proposed role in vacuolar protein sorting and in double-strand break repair; protein abundance increases in response to DNA replication stress; relocalizes to the cytosol in response to hypoxia	chrXIV	185460	186349
2				7	11	11	3
3				0	4	0	0
4				0	1	0	0
1	YNL265C	IST1	1002	604	1044	839	1203	Protein with positive role in the multivesicular body sorting pathway; functions and forms a complex with Did2p; recruitment to endosomes is mediated by the Vps2p-Vps24p subcomplex of ESCRT-III; also interacts with Vps4p	chrXIV	144280	145281
2				4	20	12	15
3				18	128	341	130
4				2	5	6	4
1	YNL301C	RPL18B	993	8603	5378	8407	5110	Ribosomal 60S subunit protein L18B; homologous to mammalian ribosomal protein L18, no bacterial homolog; RPL18B has a paralog, RPL18A, that arose from the whole genome duplication	chrXIV	63570	64562
2				26	41	38	28
3				3271	1887	1477	579
4				6	14	24	7
1	YNL302C	RPS19B	986	13	128	77	42	Protein component of the small (40S) ribosomal subunit; required for assembly and maturation of pre-40 S particles; homologous to mammalian ribosomal protein S19, no bacterial homolog; mutations in human RPS19 are associated with Diamond Blackfan anemia; RPS19B has a paralog, RPS19A, that arose from the whole genome duplication	chrXIV	61958	62943
2				2	14	9	6
3				3	23	7	3
4				1	5	2	2
1	YNL312W	RFA2	930	18	2	90	27	Subunit of heterotrimeric Replication Protein A (RPA); RPA is a highly conserved single-stranded DNA binding protein involved in DNA replication, repair, and recombination; RPA protects against inappropriate telomere recombination, and upon telomere uncapping, prevents cell proliferation by a checkpoint-independent pathway; in concert with Sgs1p-Top2p-Rmi1p, stimulates DNA catenation/decatenation…	chrXIV	48287	49216
2				1	2	3	3
3				0	0	0	3
4				0	0	0	1
1	YNL339C	YRF1-6	5728	341402	346432	309122	222791	Helicase encoded by the Y' element of subtelomeric regions; highly expressed in the mutants lacking the telomerase component TLC1; potentially phosphorylated by Cdc28p	chrXIV	371	6098
2				433	943	816	577
3				9069	10506	7417	11030
4				12	23	20	14
1	YNR053C	NOG2	1993	15	63	98	274	Putative GTPase; associates with pre-60S ribosomal subunits in the nucleolus and is required for their nuclear export and maturation; recruited by ribosomal proteins L17, L35, and L37 to assembling ribosomes after 27SB pre-rRNA is generated, immediately preceding removal of ITS2	chrXIV	721120	723112
2				1	6	3	2
3				0	0	1	0
4				0	0	1	0
1	YOL047C	LDS2	1134	5857	7522	5365	5451	Protein Involved in spore wall assembly; localizes to lipid droplets found on or outside of the prospore membrane; shares similarity with Lds1p and Rrt8p, and a strain mutant for all 3 genes exhibits reduced dityrosine fluorescence relative to the single mutants; green fluorescent protein (GFP)-fusion protein localizes to the cytoplasm in a punctate pattern	chrXV	241614	242747
2				15	55	37	27
3				724	368	434	131
4				5	4	6	3
1	YOL048C	RRT8	1107	5306	5069	3443	3926	Protein involved in spore wall assembly; shares similarity with Lds1p and Lds2p and a strain mutant for all 3 genes exhibits reduced dityrosine fluorescence relative to the single mutants; identified in a screen for mutants with increased levels of rDNA transcription; green fluorescent protein (GFP)-fusion protein localizes to lipid particles; protein abundance increases in response to DNA replic…	chrXV	240204	241310
2				16	48	35	22
3				0	288	1	194
4				0	2	1	2
1	YOL120C	RPL18A	1008	1519	402	364	255	Ribosomal 60S subunit protein L18A; intron of RPL18A pre-mRNA forms stem-loop structures that are a target for Rnt1p cleavage leading to degradation; homologous to mammalian ribosomal protein L18, no bacterial homolog; RPL18A has a paralog, RPL18B, that arose from the whole genome duplication	chrXV	93395	94402
2				11	9	10	10
3				0	2	7	0
4				0	1	4	0
1	YOL121C	RPS19A	825	122	288	124	201	Protein component of the small (40S) ribosomal subunit; required for assembly and maturation of pre-40 S particles; homologous to mammalian ribosomal protein S19, no bacterial homolog; mutations in human RPS19 are associated with Diamond Blackfan anemia; RPS19A has a paralog, RPS19B, that arose from the whole genome duplication	chrXV	92026	92850
2				5	17	21	15
3				510	669	402	131
4				4	16	8	9
1	YOL127W	RPL25	843	0	0	1	0	Ribosomal 60S subunit protein L25; primary rRNA-binding ribosomal protein component of large ribosomal subunit; binds to 25S rRNA via a conserved C-terminal motif; homologous to mammalian ribosomal protein L23A and bacterial L23	chrXV	80348	81190
2				0	0	1	0
3				0	0	6	0
4				0	0	3	0
1	YOR096W	RPS7A	974	0	2	61	0	Protein component of the small (40S) ribosomal subunit; interacts with Kti11p; deletion causes hypersensitivity to zymocin; homologous to mammalian ribosomal protein S7, no bacterial homolog; RPS7A has a paralog, RPS7B, that arose from the whole genome duplication	chrXV	505794	506767
2				0	2	5	0
3				0	17	3	0
4				0	3	2	0
1	YOR122C	PFY1	590	3	115	408	427	Profilin; binds actin, phosphatidylinositol 4,5-bisphosphate, and polyproline regions; involved in cytoskeleton organization; required for normal timing of actin polymerization in response to thermal stress; protein abundance increases in response to DNA replication stress; highly conserved protein; human PFN1 (profilin 1) complements temperature sensitive pfy1 mutants, PFN1 mutations are a rare …	chrXV	552298	552887
2				1	6	1	1
3				0	5	2	8
4				0	1	1	2
1	YOR182C	RPS30B	603	325	1189	769	309	Protein component of the small (40S) ribosomal subunit; homologous to mammalian ribosomal protein S30, no bacterial homolog; RPS30B has a paralog, RPS30A, that arose from the whole genome duplication; protein abundance increases in response to DNA replication stress	chrXV	678191	678793
2				5	20	19	8
3				417	1078	643	154
4				8	25	20	11
1	YOR234C	RPL33B	851	2325	1827	4267	3137	Ribosomal 60S subunit protein L33B; rpl33b null mutant exhibits normal growth while rpl33a rpl33b double null mutant is inviable; homologous to mammalian ribosomal protein L35A, no bacterial homolog; RPL33B has a paralog, RPL33A, that arose from the whole genome duplication	chrXV	778555	779405
2				11	34	28	22
3				1324	3083	1613	2394
4				9	35	31	22
1	YOR293W	RPS10A	755	297	832	207	354	Protein component of the small (40S) ribosomal subunit; homologous to mammalian ribosomal protein S10, no bacterial homolog; RPS10A has a paralog, RPS10B, that arose from the whole genome duplication; mutations in the human homolog associated with Diamond-Blackfan anemia	chrXV	867098	867852
2				3	12	7	9
3				122	296	68	28
4				6	30	17	7
1	YOR312C	RPL20B	945	34	58	17	8	Ribosomal 60S subunit protein L20B; homologous to mammalian ribosomal protein L18A, no bacterial homolog; RPL20B has a paralog, RPL20A, that arose from the whole genome duplication	chrXV	900250	901194
2				2	6	4	2
3				28	29	30	9
4				1	3	7	2
1	YOR318C		653	27360	26102	14996	9452	Dubious open reading frame; unlikely to encode a functional protein, based on available experimental and comparative sequence data; transcript is predicted to be spliced but there is no evidence that it is spliced in vivo	chrXV	911784	912436
2				34	82	64	42
3				13457	18307	13341	6884
4				35	84	56	24
1	YPL031C	PHO85	1020	0	193	117	2	Cyclin-dependent kinase; has ten cyclin partners; involved in regulating the cellular response to nutrient levels and environmental conditions and progression through the cell cycle; human lissencephaly-associated homolog CDK5 functionally complements null mutation	chrXVI	492018	493037
2				0	7	3	1
3				0	265	1	973
4				0	2	1	1
1	YPL075W	GCR1	3109	42	99	60	5	Transcriptional activator of genes involved in glycolysis; DNA-binding protein that interacts and functions with the transcriptional activator Gcr2p	chrXVI	412254	415362
2				2	5	5	1
3				5878	3164	2187	2172
4				15	32	25	19
1	YPL079W	RPL21B	904	14687	7999	5959	26457	Ribosomal 60S subunit protein L21B; homologous to mammalian ribosomal protein L21, no bacterial homolog; RPL21B has a paralog, RPL21A, that arose from the whole genome duplication	chrXVI	406636	407539
2				25	63	54	51
3				6074	3331	810	10346
4				23	32	24	38
1	YPL081W	RPS9A	1095	4016	5876	3888	4130	Protein component of the small (40S) ribosomal subunit; homologous to mammalian ribosomal protein S9 and bacterial S4; RPS9A has a paralog, RPS9B, that arose from the whole genome duplication	chrXVI	404950	406044
2				28	74	57	39
3				1002	8994	8236	3206
4				22	64	61	40
1	YPL090C	RPS6A	1105	14	32	30	5	Protein component of the small (40S) ribosomal subunit; homologous to mammalian ribosomal protein S6, no bacterial homolog; phosphorylated on S233 by Ypk3p in a TORC1-dependent manner, and on S232 in a TORC1/2-dependent manner by Ypk1/2/3p; RPS6A has a paralog, RPS6B, that arose from the whole genome duplication	chrXVI	377291	378395
2				2	6	7	1
3				10	101	42	442
4				1	9	7	4
1	YPL109C		2126	2971	3632	1091	2186	UbiB family protein; contains transmembrane domain and mitochondrial targeting sequence; the authentic, non-tagged protein is detected in highly purified mitochondria in high-throughput studies	chrXVI	345264	347389
2				22	66	44	34
3				82	124	51	85
4				1	2	1	3
1	YPL129W	TAF14	840	0	0	0	0	Subunit of TFIID, TFIIF, INO80, SWI/SNF, and NuA3 complexes; involved in RNA polymerase II transcription initiation and in chromatin modification; contains a YEATS domain	chrXVI	305298	306137
2				0	0	0	0
3				0	0	0	0
4				0	0	0	0
1	YPL143W	RPL33A	849	0	21	12	0	Ribosomal 60S subunit protein L33A; N-terminally acetylated; rpl33a null mutant exhibits slow growth while rpl33a rpl33b double null mutant is inviable; homologous to mammalian ribosomal protein L35A, no bacterial homolog; RPL33A has a paralog, RPL33B, that arose from the whole genome duplication	chrXVI	282122	282970
2				0	1	1	0
3				0	0	1	0
4				0	0	1	0
1	YPL175W	SPT14	1459	0	308	14	1	UDP-glycosyltransferase subunit of the GPI-GnT complex; UDP-GlcNAc-binding and catalytic subunit of the enzyme that mediates the first step in glycosylphosphatidylinositol (GPI) biosynthesis, mutations cause defects in transcription and in biogenesis of cell wall proteins	chrXVI	218630	220088
2				0	1	2	1
3				0	0	0	0
4				0	0	0	0
1	YPL198W	RPL7B	1551	16360	8417	6631	2399	Ribosomal 60S subunit protein L7B; required for processing of 27SA3 pre-rRNA to 27SB pre-rRNA during assembly of large ribosomal subunit; depletion leads to a turnover of pre-rRNA; contains a conserved C-terminal Nucleic acid Binding Domain (NDB2); binds to Domain II of 25S and 5.8S rRNAs; homologous to mammalian ribosomal protein L7 and bacterial L30; RPL7B has a paralog, RPL7A, that arose from …	chrXVI	173152	174702
2				27	69	54	34
3				15069	10320	9814	9134
4				23	60	52	47
1	YPL218W	SAR1	712	0	0	3	0	ARF family GTPase; component of the COPII vesicle coat; required for transport vesicle formation during ER to Golgi protein transport; lowers membrane rigidity aiding vesicle formation; localizes to ER-mitochondrial contact sites where it enhances membrane curvature, thereby reducing contact size via its N-terminal amphipathic helix; regulates mitochondrial fission and fusion dynamics	chrXVI	138698	139409
2				0	0	2	0
3				0	0	1	0
4				0	0	1	0
1	YPL241C	CIN2	887	7537	16069	15611	10542	GTPase-activating protein (GAP) for Cin4p; tubulin folding factor C involved in beta-tubulin (Tub2p) folding; mutants display increased chromosome loss and benomyl sensitivity; human homolog RP2 complements yeast null mutant	chrXVI	95372	96258
2				47	125	118	59
3				0	71	29	64
4				0	4	2	2
1	YPL249C-A	RPL36B	541	107	309	139	14	Ribosomal 60S subunit protein L36B; binds to 5.8 S rRNA; homologous to mammalian ribosomal protein L36, no bacterial homolog; RPL36B has a paralog, RPL36A, that arose from the whole genome duplication	chrXVI	75699	76239
2				3	7	8	3
3				0	10	7	0
4				0	1	2	0
1	YPL283C	YRF1-7	5728	341145	348364	309069	222159	Helicase encoded by the Y' element of subtelomeric regions; highly expressed in the mutants lacking the telomerase component TLC1; potentially phosphorylated by Cdc28p	chrXVI	280	6007
2				428	971	815	581
3				8892	10577	7483	11082
4				12	22	21	15
1	YPR010C-A		362	108	568	736	761	Putative protein of unknown function; SWAT-GFP, seamless-GFP and mCherry fusion proteins localize to the cytosol; conserved among Saccharomyces sensu stricto species	chrXVI	582373	582734
2				3	13	12	9
3				303	475	865	649
4				3	8	5	3
1	YPR028W	YOP1	676	1899	2243	1326	1329	Reticulon-interacting protein; ER integral membrane protein involved in the generation of tubular ER morphology; promotes membrane curvature; forms tubules in vitro; regulates the ER asymmetry-induced inheritance block during ER stress; role in ER-derived peroxisomal biogenesis; interacts with Yip1p to mediate membrane traffic and with Sey1p to maintain ER morphology; facilitates lipid exchange b…	chrXVI	623527	624202
2				14	37	30	18
3				1934	2248	4505	1797
4				8	18	12	7
1	YPR043W	RPL43A	682	355	198	99	150	Ribosomal 60S subunit protein L43A; null mutation confers a dominant lethal phenotype; homologous to mammalian ribosomal protein L37A, no bacterial homolog; RPL43A has a paralog, RPL43B, that arose from the whole genome duplication	chrXVI	654166	654847
2				7	12	10	4
3				307	73	73	223
4				6	11	14	10
1	YPR063C		509	3305	4736	5662	1941	ER-localized protein of unknown function	chrXVI	677812	678320
2				6	24	27	17
3				1722	875	669	165
4				5	11	10	3
1	YPR098C		582	5483	5692	5141	3149	Protein of unknown function; localized to the mitochondrial outer membrane	chrXVI	728947	729528
2				19	64	51	35
3				676	1678	274	178
4				4	10	7	5
1	YPR132W	RPS23B	803	1742	672	282	188	Ribosomal protein 28 (rp28) of the small (40S) ribosomal subunit; required for translational accuracy; homologous to mammalian ribosomal protein S23 and bacterial S12; RPS23B has a paralog, RPS23A, that arose from the whole genome duplication; deletion of both RPS23A and RPS23B is lethal	chrXVI	794965	795767
2				3	12	11	4
3				52	37	3	0
4				2	4	3	0
1	YPR153W	MAY24	557	66	822	1433	954	Protein of unknown function	chrXVI	833689	834245
2				1	19	18	15
3				52	308	383	42320
4				2	11	10	6
1	YPR170W-B		357	1184	1989	1206	1577	Putative protein of unknown function; conserved in fungi; SWAT-GFP fusion protein localizes to the vacuole membrane; partially overlaps the dubious genes YPR169W-A, YPR170W-A and YRP170C	chrXVI	883239	883595
2				7	14	17	8
3				120	251	44	0
4				1	5	3	0
1	YPR187W	RPO26	544	0	0	0	0	RNA polymerase subunit ABC23; common to RNA polymerases I, II, and III; part of central core; similar to bacterial omega subunit	chrXVI	911257	911800
2				0	0	0	0
3				0	0	0	0
4				0	0	0	0
1	YPR202W		865	47025	35324	27501	25474	Putative protein of unknown function; similar to telomere-encoded helicases; down-regulated at low calcium levels; YPR202W is not an essential gene; transcript is predicted to be spliced but there is no evidence that it is spliced in vivo	chrXVI	943032	943896
2				66	128	112	74
3				9153	11305	6804	10998
4				15	21	24	14
